# Supplementary material for: New Mannich-type arylidenerhodanines as potent inhibitors of AChE and BChE: synthesis, biological evaluation, cytotoxicity and molecular modeling
Source: Royal Society of Chemistry journal article supplement (doi:10.1039/d5ra07416a), 2025-01-01
Supplement: d5ra07416a1.pdf [file d5ra07416a1.pdf]

## SUPPORTING INFORMATION

| <b>CONTENTS</b>                                              | <b>Page</b> |
|--------------------------------------------------------------|-------------|
| Figure S1. <sup>1</sup> H NMR Spectrum of Compound 1.....    | 3           |
| Figure S2. <sup>13</sup> C NMR Spectrum of Compound 1.....   | 3           |
| Figure S3. FTIR Spectrum of Compound 1.....                  | 4           |
| Figure S4. HRMS Spectrum of Compound 1.....                  | 4           |
| Figure S5. <sup>1</sup> H NMR Spectrum of Compound 2.....    | 5           |
| Figure S6. <sup>13</sup> C NMR Spectrum of Compound 2.....   | 5           |
| Figure S7. FTIR Spectrum of Compound 2.....                  | 6           |
| Figure S8. HRMS Spectrum of Compound 2.....                  | 6           |
| Figure S9. <sup>1</sup> H NMR Spectrum of Compound 3.....    | 7           |
| Figure S10. <sup>13</sup> C NMR Spectrum of Compound 3.....  | 7           |
| Figure S11. FTIR Spectrum of Compound 3.....                 | 8           |
| Figure S12. HRMS Spectrum of Compound 3.....                 | 8           |
| Figure S13. <sup>1</sup> H NMR Spectrum of Compound 4.....   | 9           |
| Figure S14. <sup>13</sup> C NMR Spectrum of Compound 4.....  | 9           |
| Figure S15. FTIR Spectrum of Compound 4.....                 | 10          |
| Figure S16. HRMS Spectrum of Compound 4.....                 | 10          |
| Figure S17. <sup>1</sup> H NMR Spectrum of Compound 5.....   | 11          |
| Figure S18. <sup>13</sup> C NMR Spectrum of Compound 5.....  | 11          |
| Figure S19. FTIR Spectrum of Compound 5.....                 | 12          |
| Figure S20. HRMS Spectrum of Compound 5.....                 | 12          |
| Figure S21. <sup>1</sup> H NMR Spectrum of Compound 6.....   | 13          |
| Figure S22. <sup>13</sup> C NMR Spectrum of Compound 6.....  | 13          |
| Figure S23. FTIR Spectrum of Compound 6.....                 | 14          |
| Figure S24. HRMS Spectrum of Compound 6.....                 | 14          |
| Figure S25. <sup>1</sup> H NMR Spectrum of Compound 7.....   | 15          |
| Figure S26. <sup>13</sup> C NMR Spectrum of Compound 7.....  | 15          |
| Figure S27. FTIR Spectrum of Compound 7.....                 | 16          |
| Figure S28. HRMS Spectrum of Compound 7.....                 | 16          |
| Figure S29. <sup>1</sup> H NMR Spectrum of Compound 8.....   | 17          |
| Figure S30. <sup>13</sup> C NMR Spectrum of Compound 8.....  | 17          |
| Figure S31. FTIR Spectrum of Compound 8.....                 | 18          |
| Figure S32. HRMS Spectrum of Compound 8.....                 | 18          |
| Figure S33. <sup>1</sup> H NMR Spectrum of Compound 9.....   | 19          |
| Figure S34. <sup>13</sup> C NMR Spectrum of Compound 9.....  | 19          |
| Figure S35. FTIR Spectrum of Compound 9.....                 | 20          |
| Figure S36. HRMS Spectrum of Compound 9.....                 | 20          |
| Figure S37. <sup>1</sup> H NMR Spectrum of Compound 10.....  | 21          |
| Figure S38. <sup>13</sup> C NMR Spectrum of Compound 10..... | 21          |
| Figure S39. FTIR Spectrum of Compound 10.....                | 22          |
| Figure S40. HRMS Spectrum of Compound 10.....                | 22          |
| Figure S41. <sup>1</sup> H NMR Spectrum of Compound 11.....  | 23          |
| Figure S42. <sup>13</sup> C NMR Spectrum of Compound 11..... | 23          |
| Figure S43. FTIR Spectrum of Compound 11.....                | 24          |
| Figure S44. HRMS Spectrum of Compound 11.....                | 24          |
| Figure S45. <sup>1</sup> H NMR Spectrum of Compound 12.....  | 25          |
| Figure S46. <sup>13</sup> C NMR Spectrum of Compound 12..... | 25          |
| Figure S47. FTIR Spectrum of Compound 12.....                | 26          |
| Figure S48. HRMS Spectrum of Compound 12.....                | 26          |
| Figure S49. <sup>1</sup> H NMR Spectrum of Compound 13.....  | 27          |

|                                                                  |    |
|------------------------------------------------------------------|----|
| Figure S50. $^{13}\text{C}$ NMR Spectrum of Compound 13.....     | 27 |
| Figure S51. FTIR Spectrum of Compound 13.....                    | 28 |
| Figure S52. HRMS Spectrum of Compound 13.....                    | 28 |
| Figure S53. Lineweaver-Burk plots of compound 1 for AChE.....    | 29 |
| Figure S54. Lineweaver-Burk plots of compound 2 for AChE.....    | 29 |
| Figure S55. Lineweaver-Burk plots of compound 3 for AChE.....    | 29 |
| Figure S56. Lineweaver-Burk plots of compound 4 for AChE.....    | 30 |
| Figure S57. Lineweaver-Burk plots of compound 5 for AChE.....    | 30 |
| Figure S58. Lineweaver-Burk plots of compound 6 for AChE.....    | 30 |
| Figure S59. Lineweaver-Burk plots of compound 7 for AChE.....    | 31 |
| Figure S60. Lineweaver-Burk plots of compound 8 for AChE.....    | 31 |
| Figure S61. Lineweaver-Burk plots of compound 9 for AChE.....    | 31 |
| Figure S62. Lineweaver-Burk plots of compound 10 for AChE.....   | 32 |
| Figure S63. Lineweaver-Burk plots of compound 11 for AChE.....   | 32 |
| Figure S64. Lineweaver-Burk plots of compound 12 for AChE.....   | 32 |
| Figure S65. Lineweaver-Burk plots of compound 13 for AChE.....   | 33 |
| Figure S66. Lineweaver-Burk plots of compound 1 for BChE.....    | 33 |
| Figure S67. Lineweaver-Burk plots of compound 2 for BChE.....    | 33 |
| Figure S68. Lineweaver-Burk plots of compound 3 for BChE.....    | 34 |
| Figure S69. Lineweaver-Burk plots of compound 4 for BChE.....    | 34 |
| Figure S70. Lineweaver-Burk plots of compound 5 for BChE.....    | 34 |
| Figure S71. Lineweaver-Burk plots of compound 6 for BChE.....    | 35 |
| Figure S72. Lineweaver-Burk plots of compound 7 for BChE.....    | 35 |
| Figure S73. Lineweaver-Burk plots of compound 8 for BChE.....    | 35 |
| Figure S74. Lineweaver-Burk plots of compound 9 for BChE.....    | 36 |
| Figure S75. Lineweaver-Burk plots of compound 10 for BChE.....   | 36 |
| Figure S76. Lineweaver-Burk plots of compound 11 for BChE.....   | 36 |
| Figure S77. Lineweaver-Burk plots of compound 12 for BChE.....   | 37 |
| Figure S78. Lineweaver-Burk plots of compound 13 for BChE.....   | 37 |
| Figure S79. $\text{IC}_{50}$ Graph of compound 4 for HUVEC.....  | 38 |
| Figure S80. $\text{IC}_{50}$ Graph of compound 6 for HUVEC.....  | 38 |
| Figure S81. $\text{IC}_{50}$ Graph of compound 7 for HUVEC.....  | 38 |
| Figure S82. $\text{IC}_{50}$ Graph of compound 10 for HUVEC..... | 39 |
| Figure S83. $\text{IC}_{50}$ Graph of compound 11 for HUVEC..... | 39 |

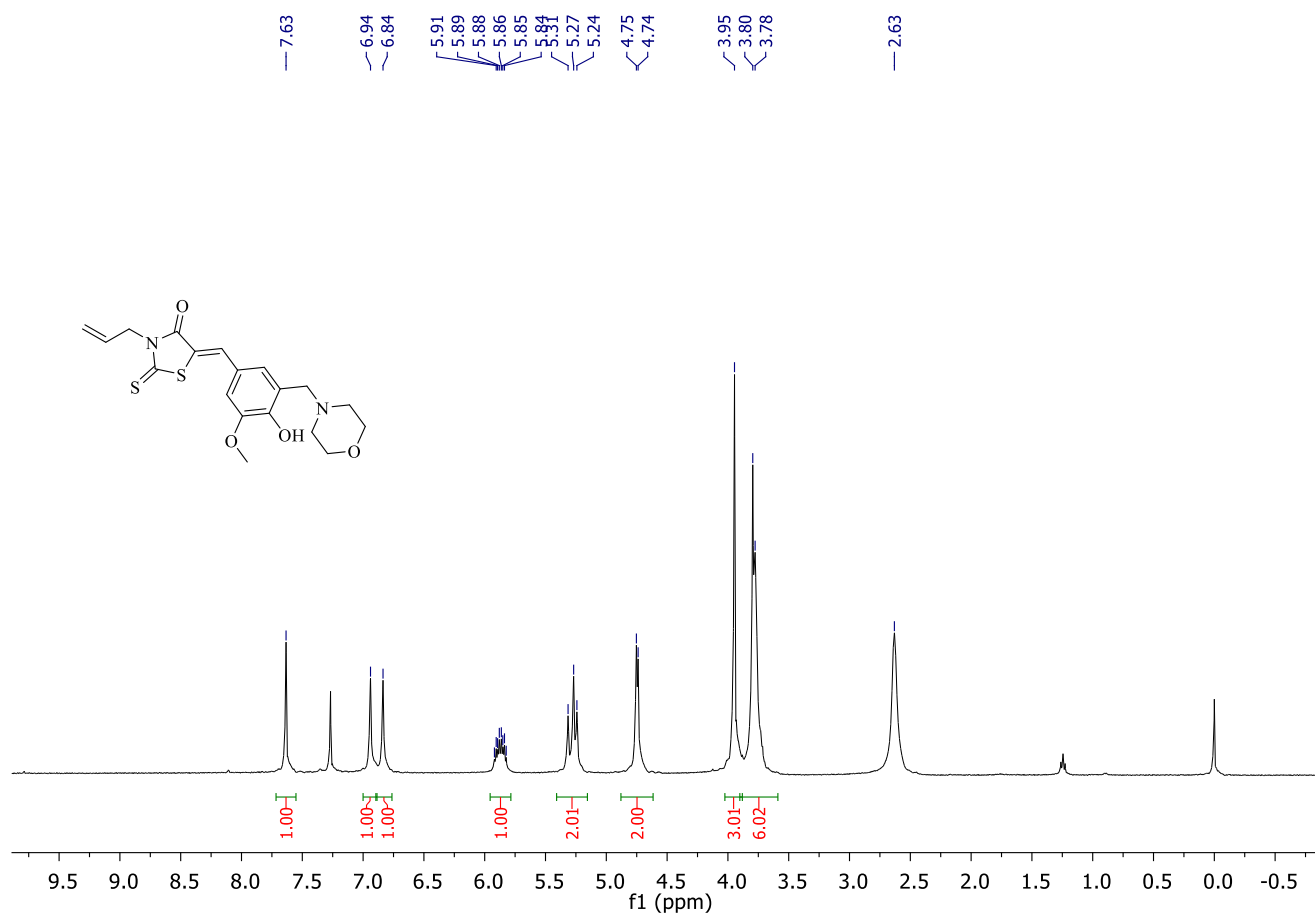

Figure S1. <sup>1</sup>H NMR Spectrum of Compound 1

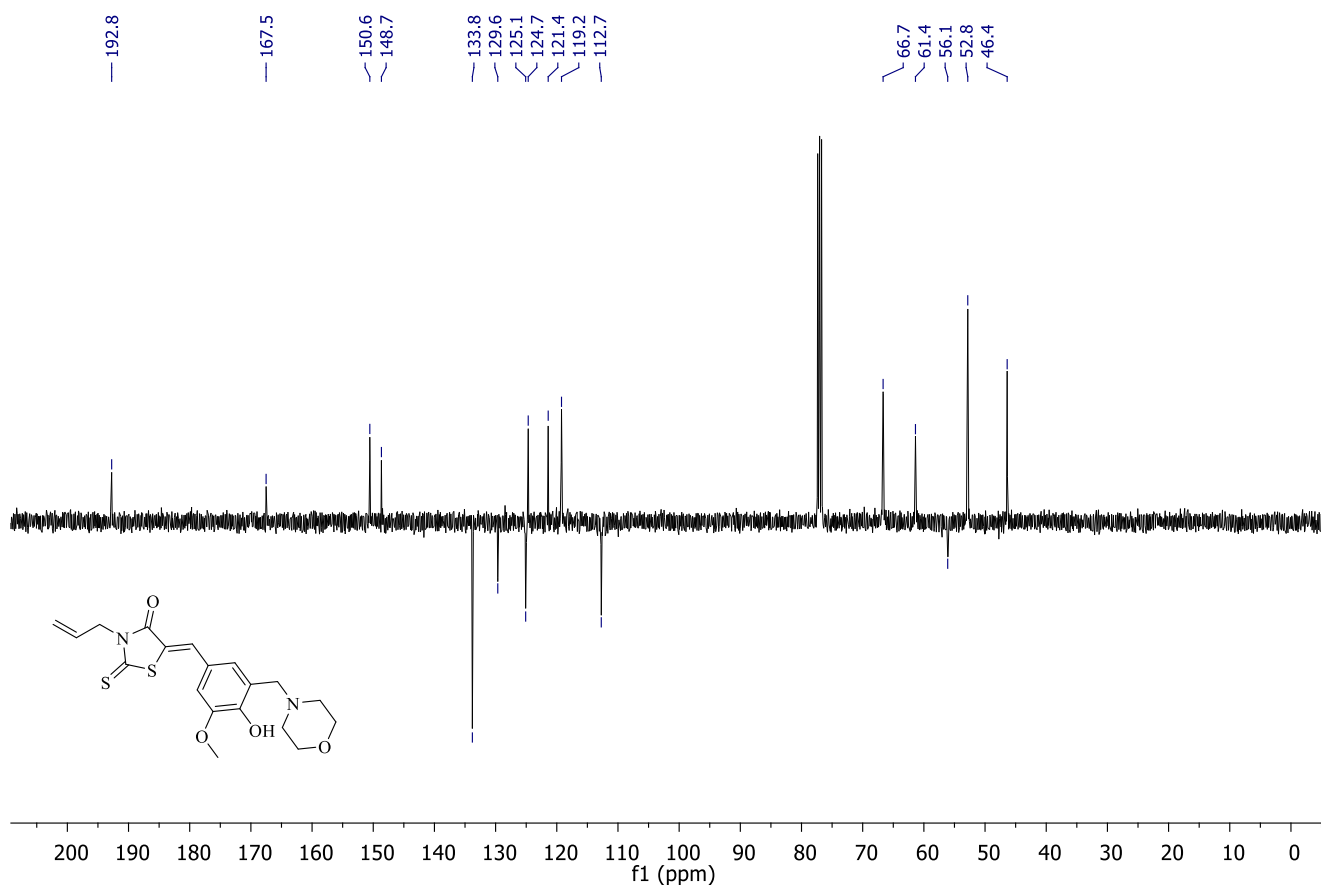

Figure S2. <sup>13</sup>C NMR Spectrum of Compound 1

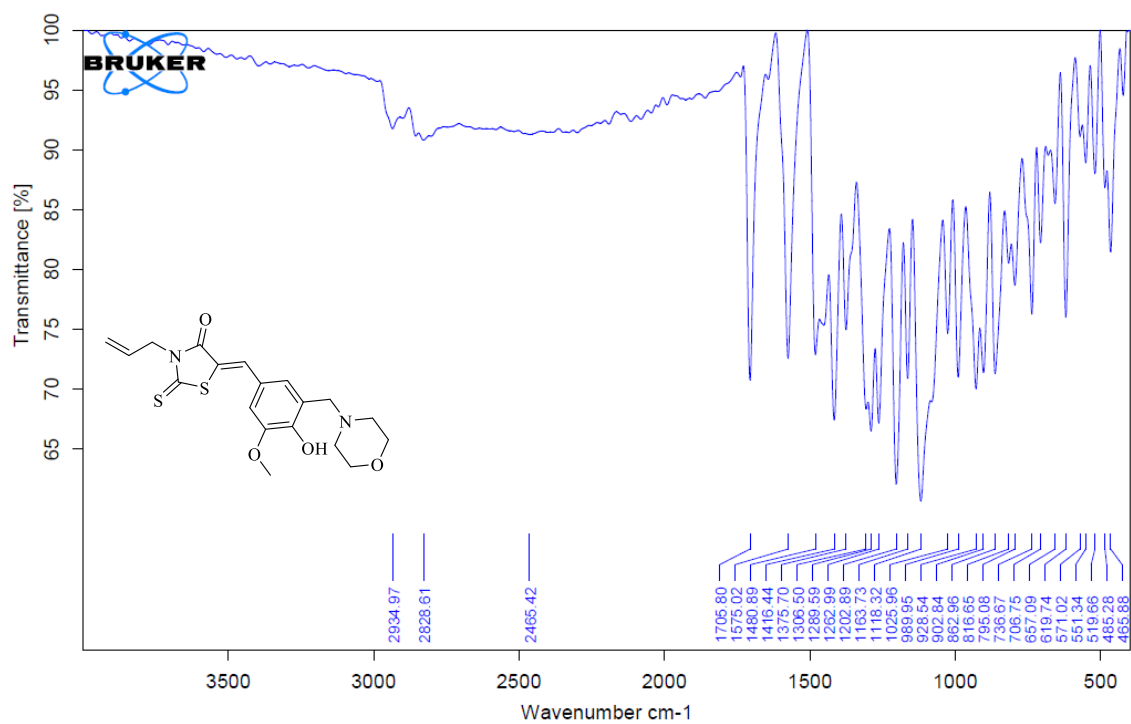

Figure S3. FTIR Spectrum of Compound 1

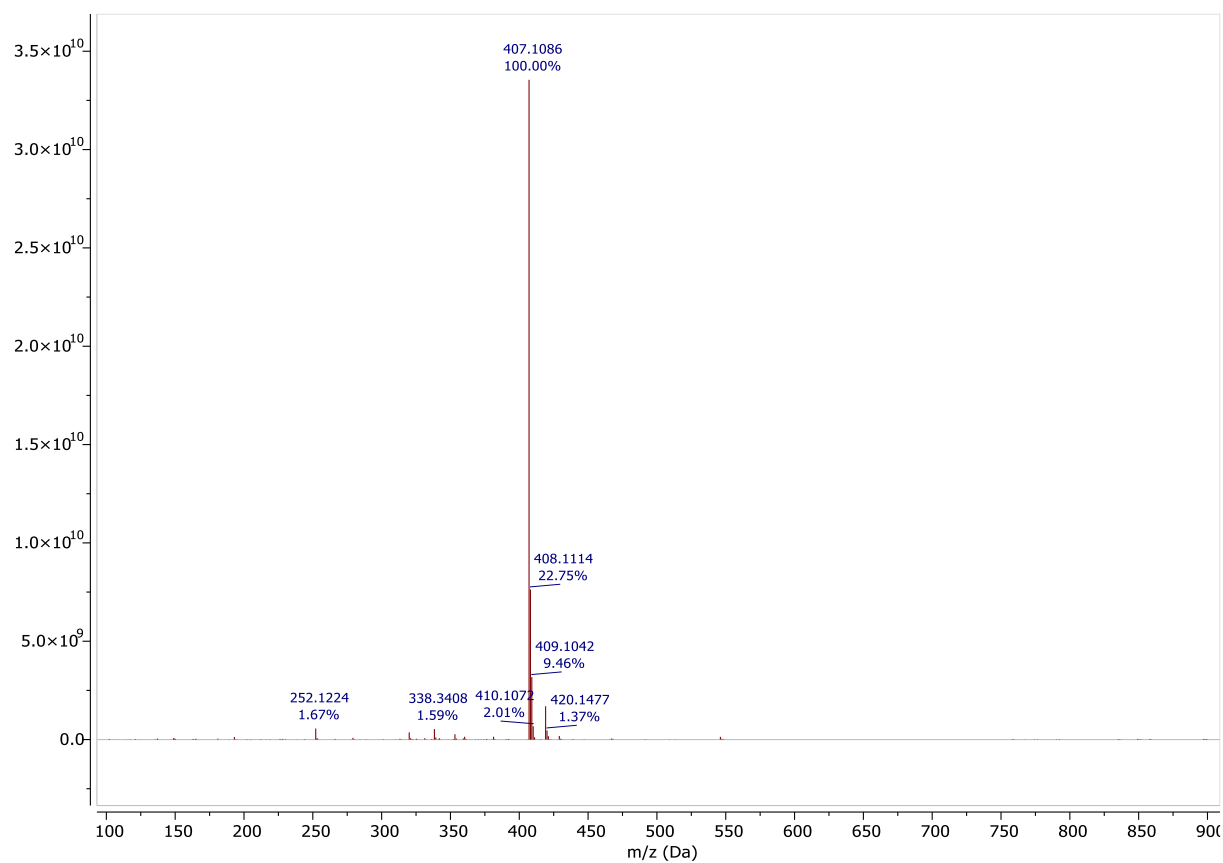

Figure S4. HRMS Spectrum of Compound 1

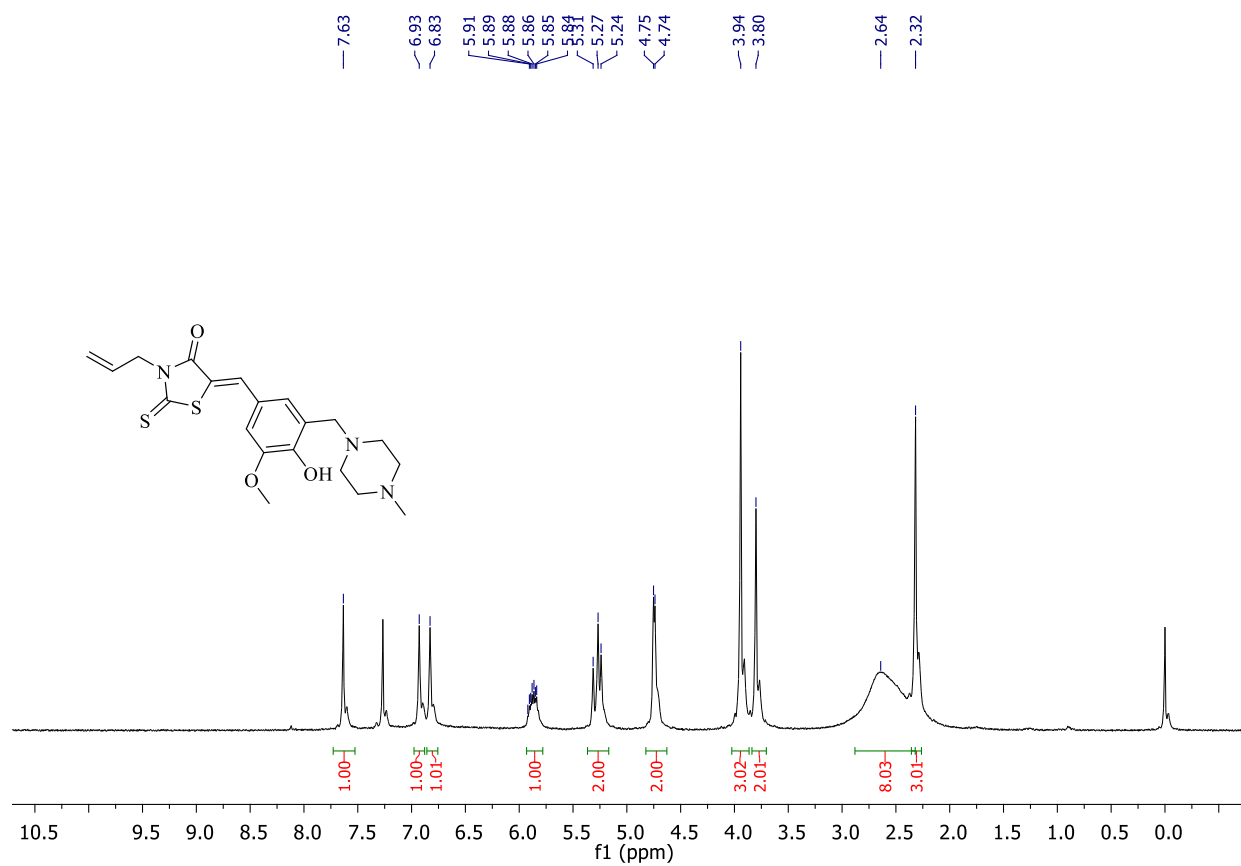

Figure S5. <sup>1</sup>H NMR Spectrum of Compound 2

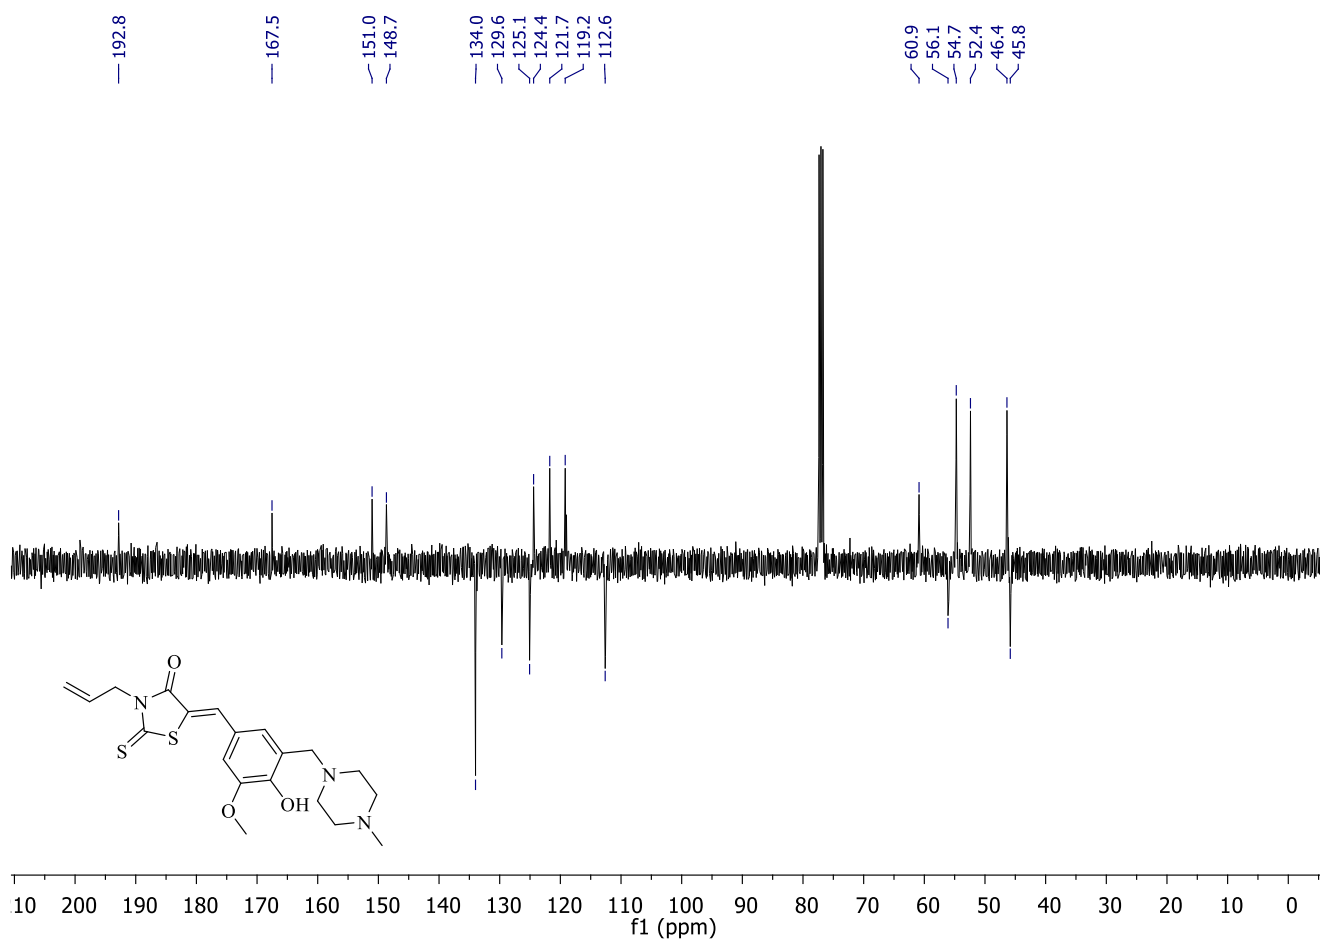

Figure S6. <sup>13</sup>C NMR Spectrum of Compound 2

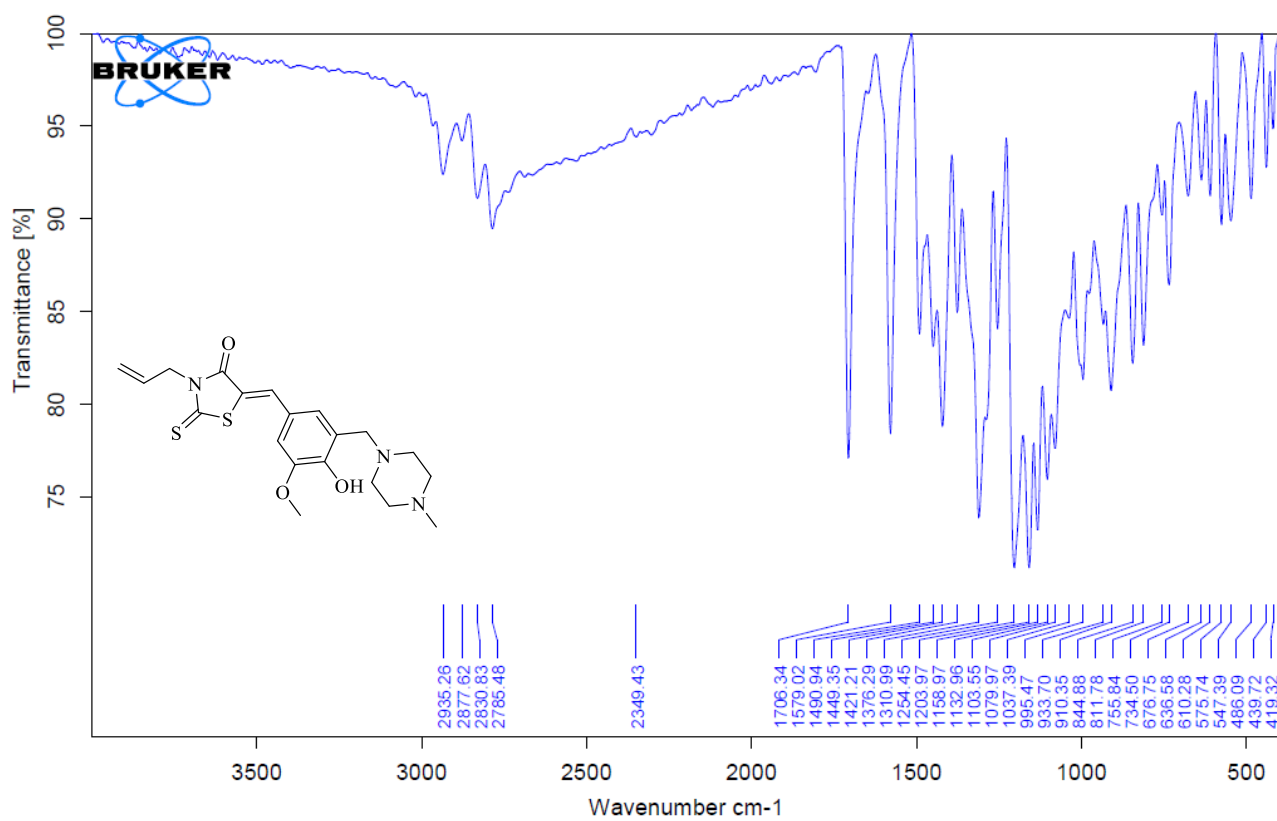

Figure S7. FTIR Spectrum of Compound 2

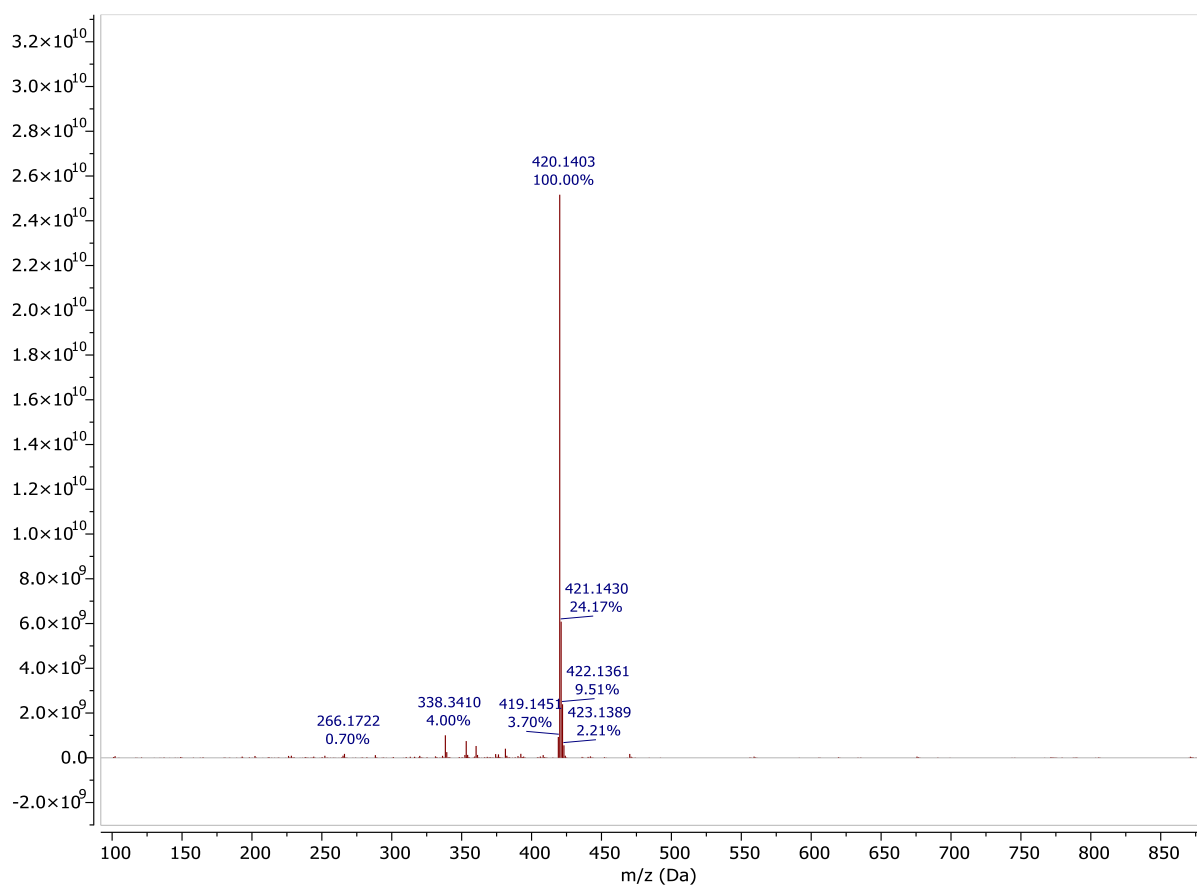

Figure S8. HRMS Spectrum of Compound 2

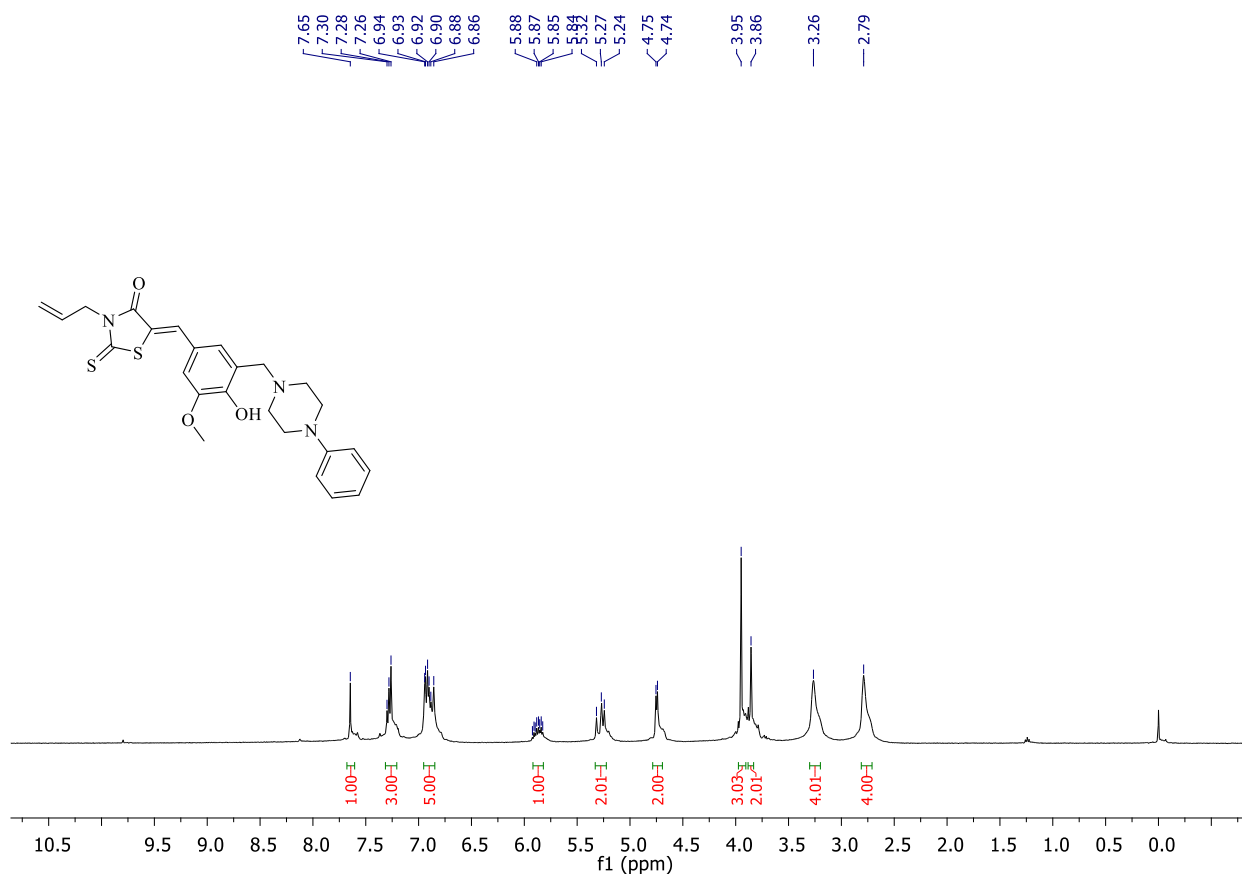

Figure S9. <sup>1</sup>H NMR Spectrum of Compound 3

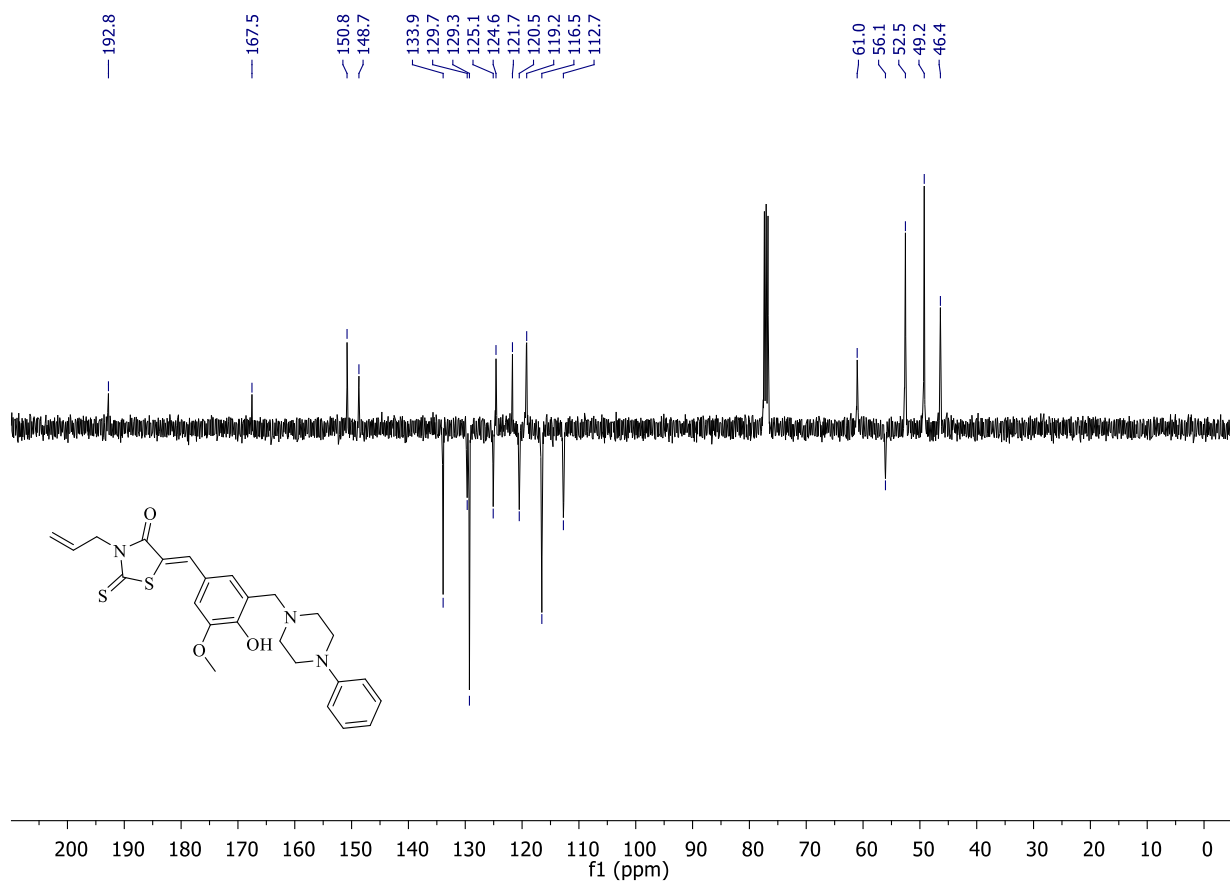

Figure S10. <sup>13</sup>C NMR Spectrum of Compound 3

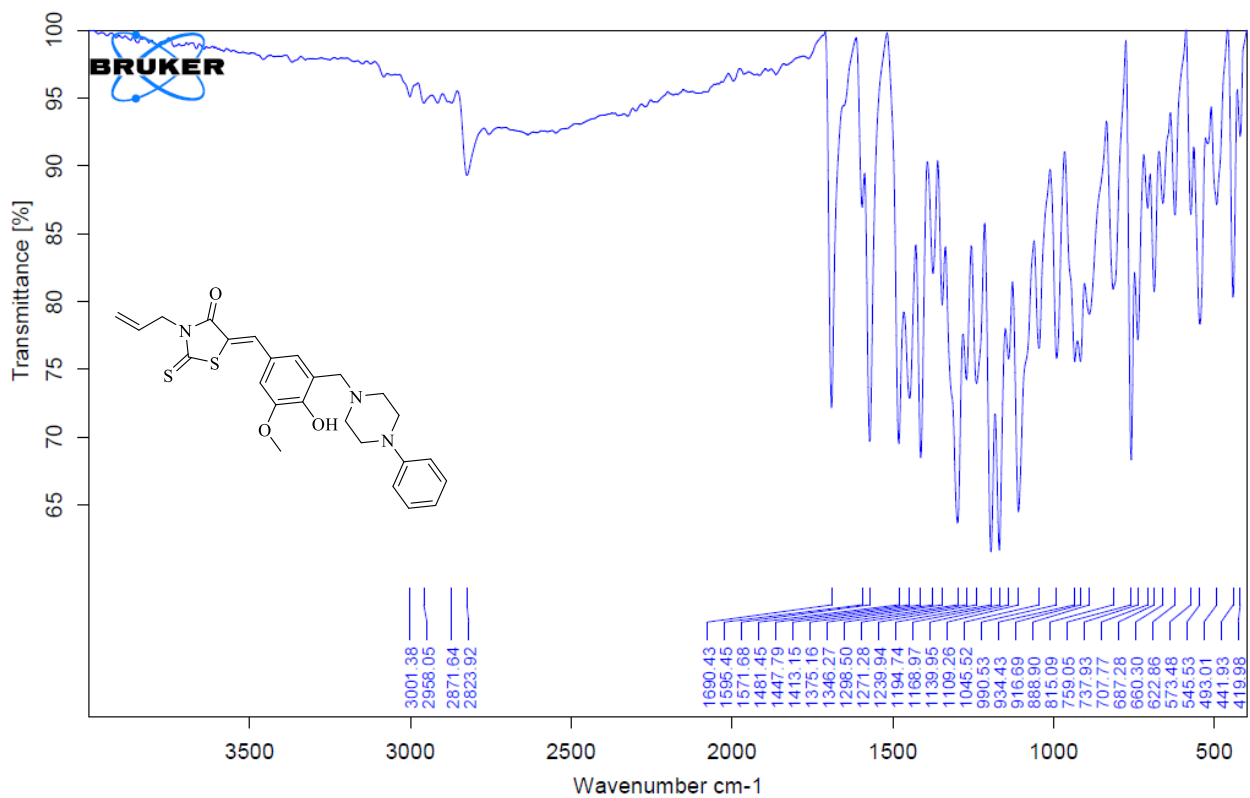

Figure S11. FTIR Spectrum of Compound 3

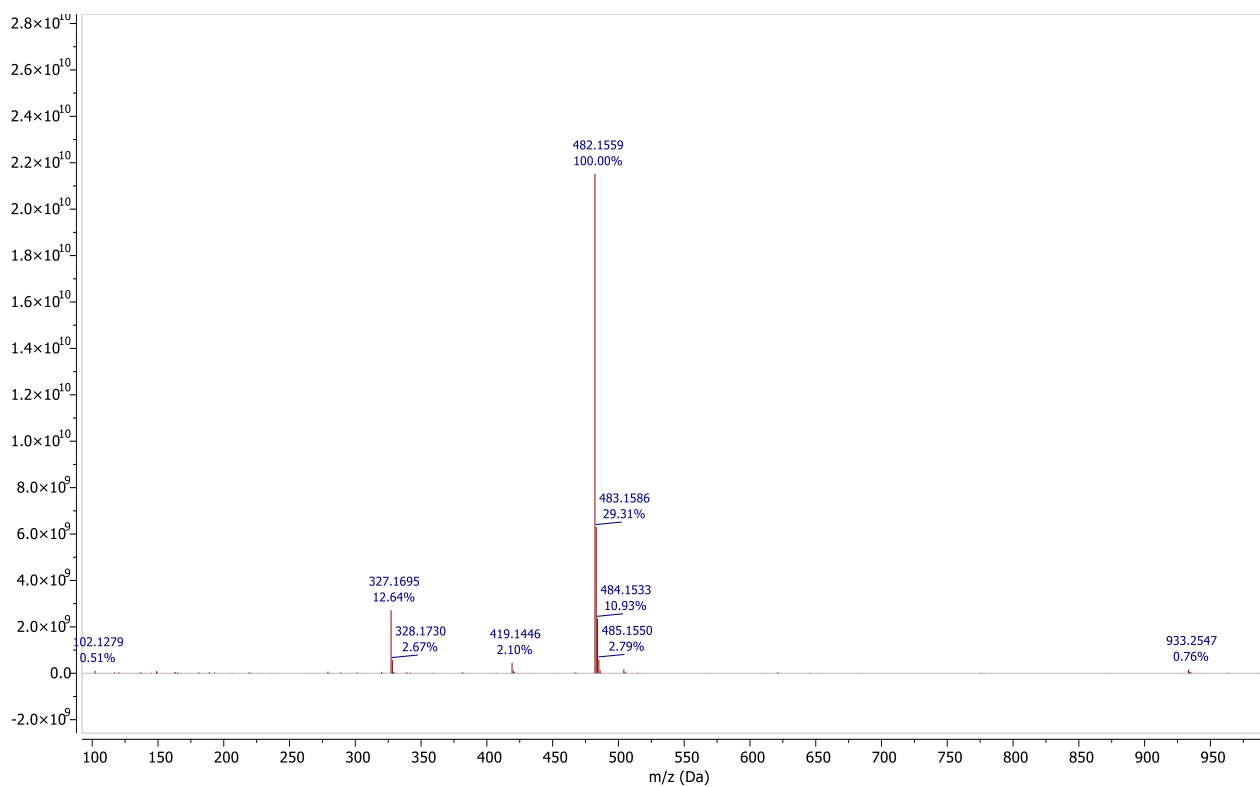

Figure S2. HRMS Spectrum of Compound 3



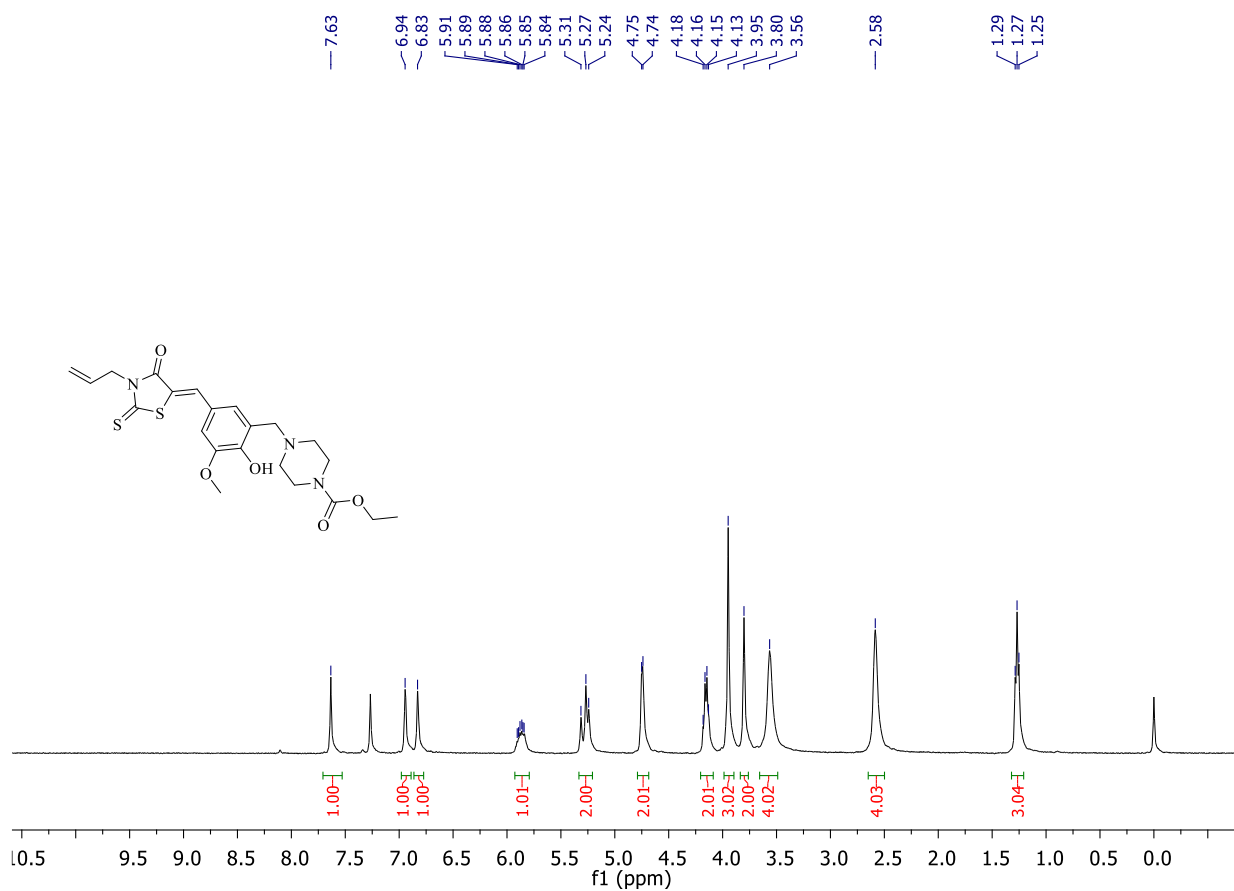

Figure S13. <sup>1</sup>H NMR Spectrum of Compound 4

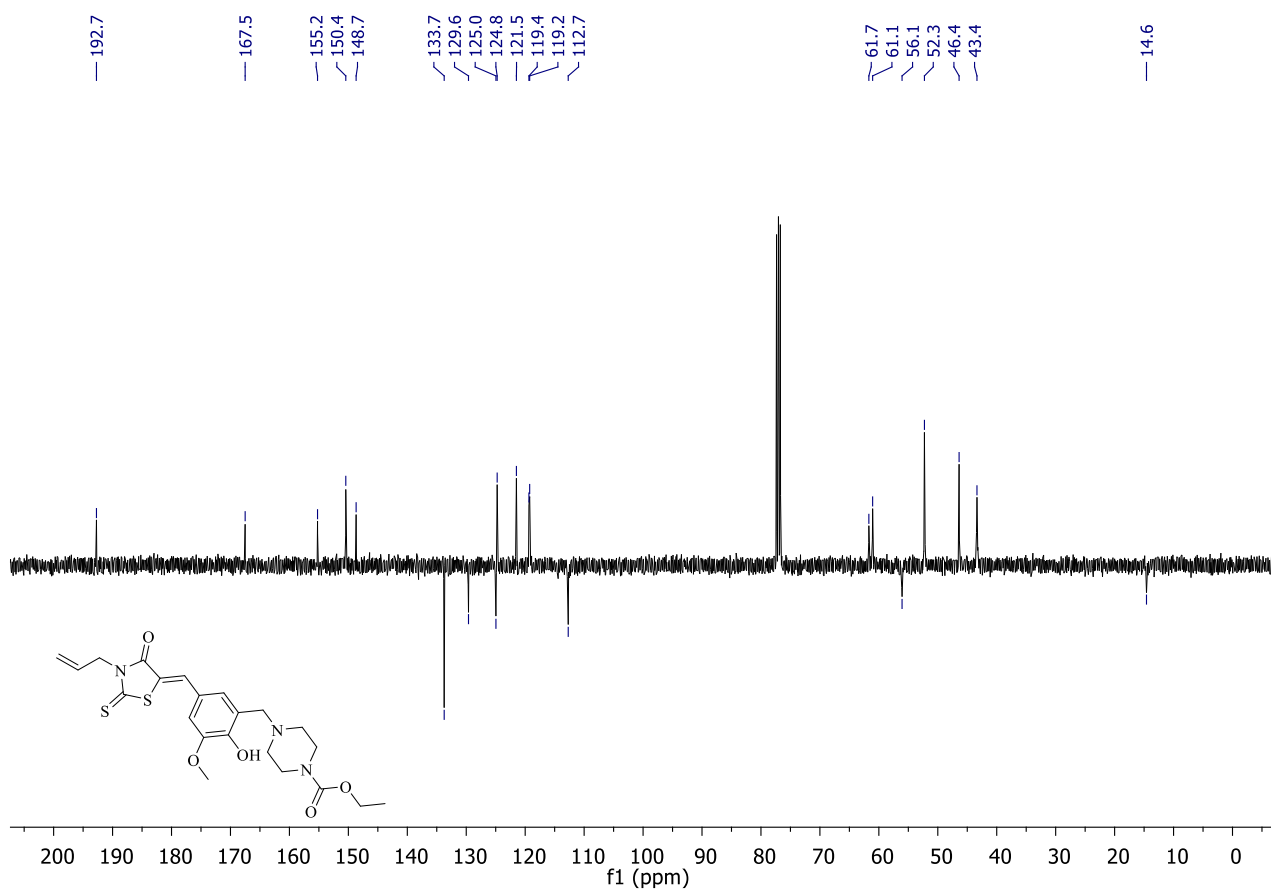

Figure S14. <sup>13</sup>C NMR Spectrum of Compound 4

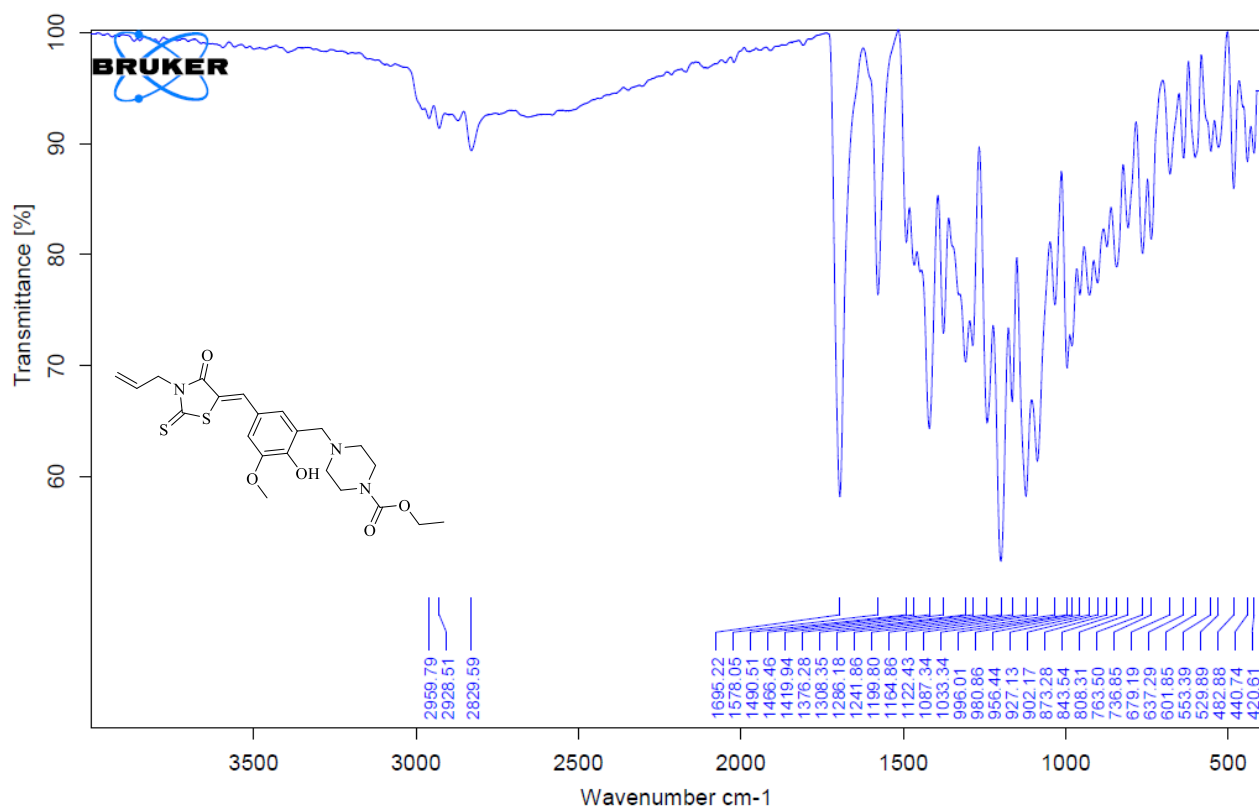

Figure S15. FTIR Spectrum of Compound 4

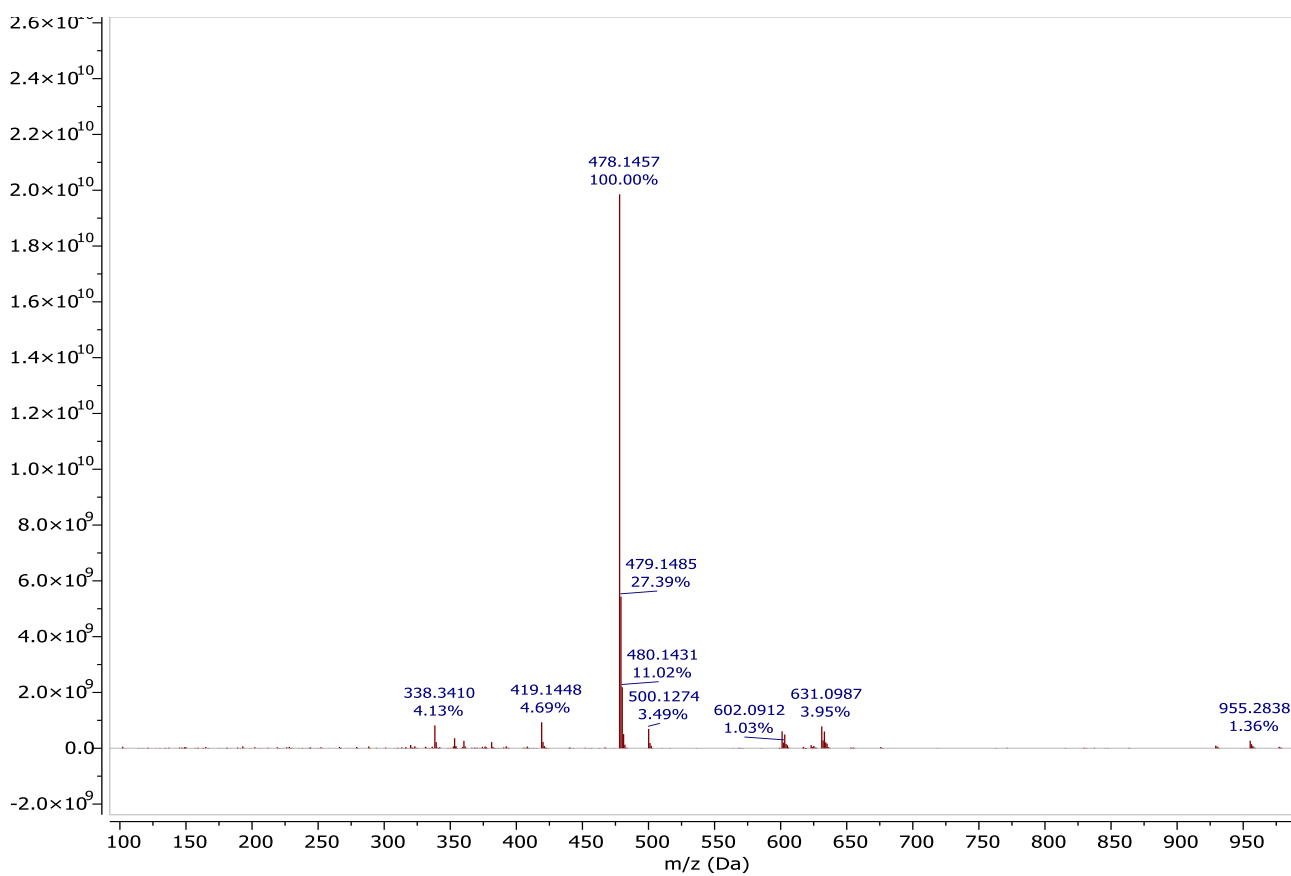

Figure S16. HRMS Spectrum of Compound 4

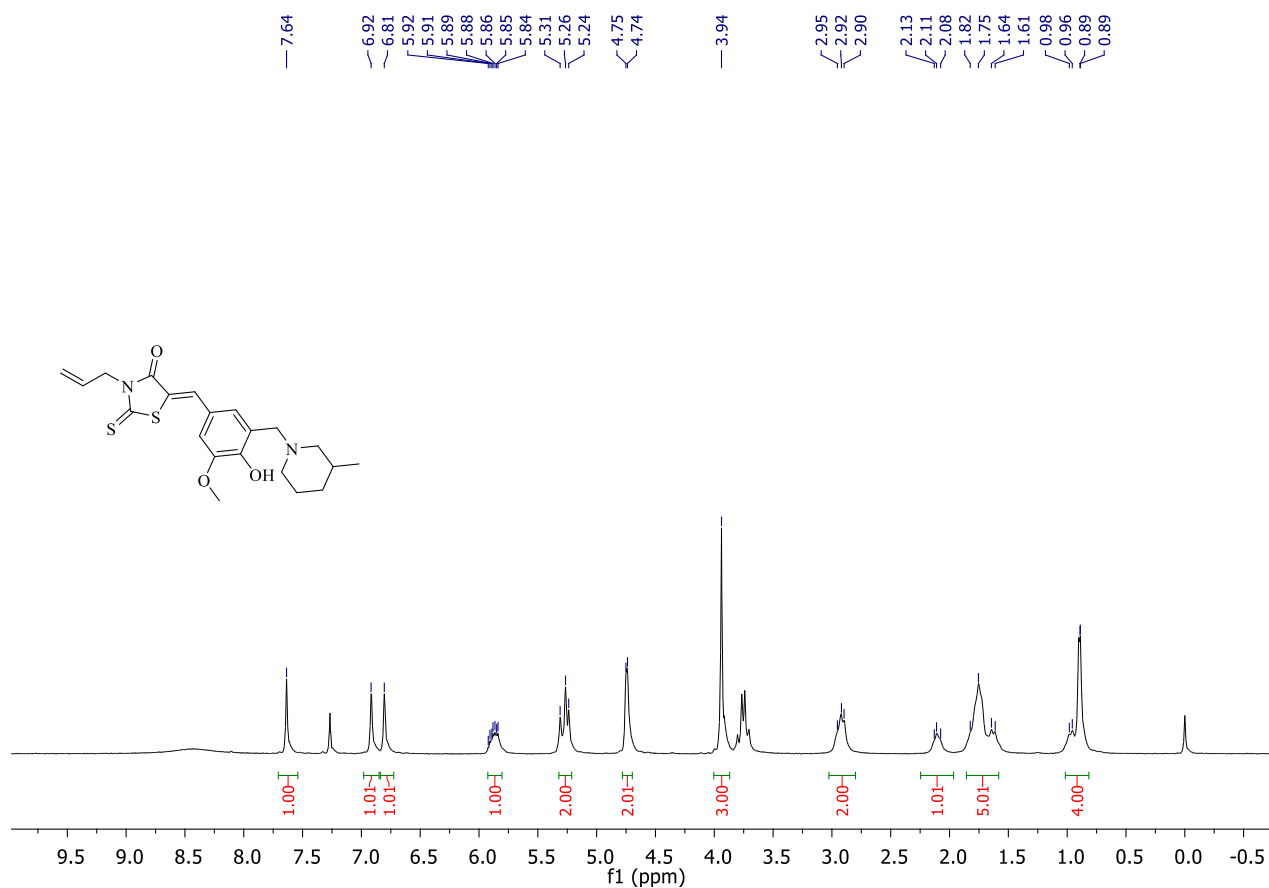

Figure S17. <sup>1</sup>H NMR Spectrum of Compound 5

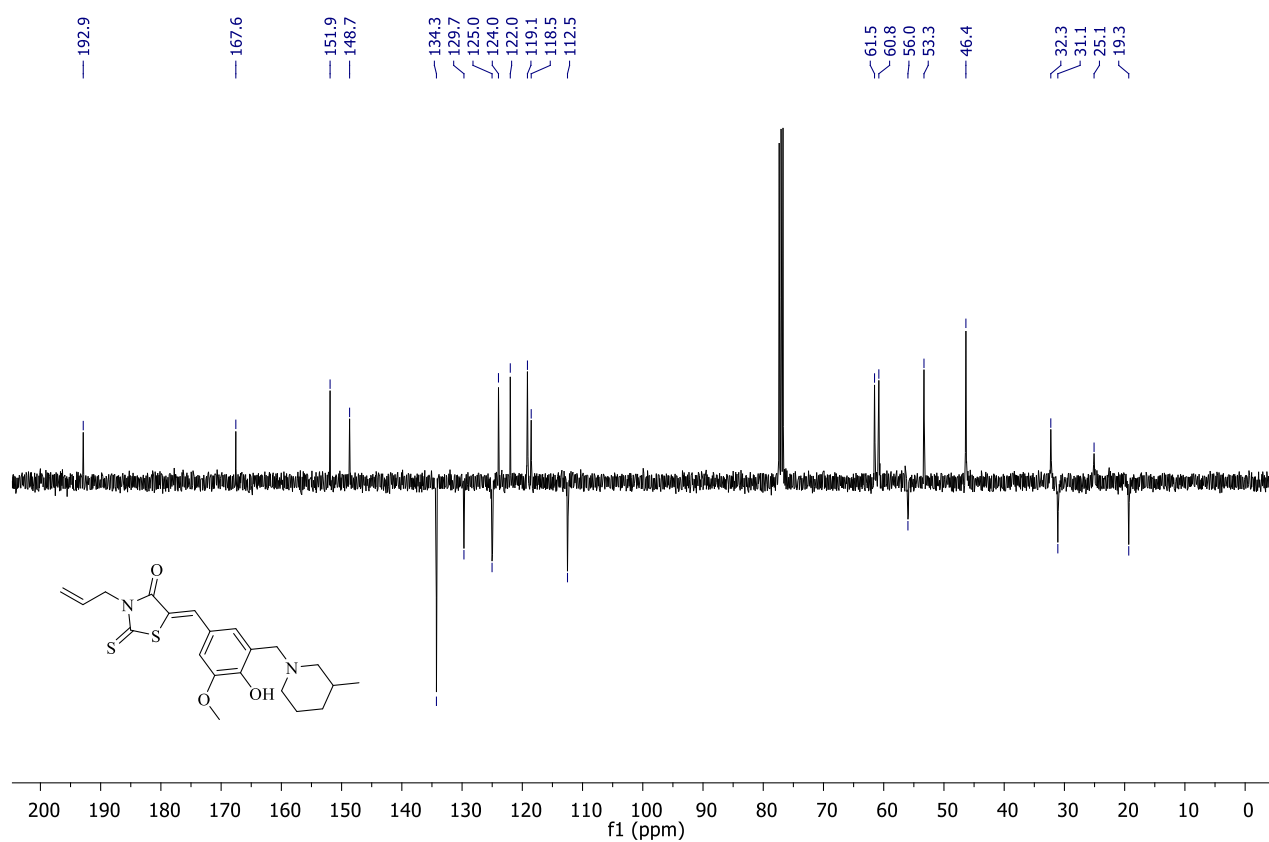

Figure S18. <sup>13</sup>C NMR Spectrum of Compound 5

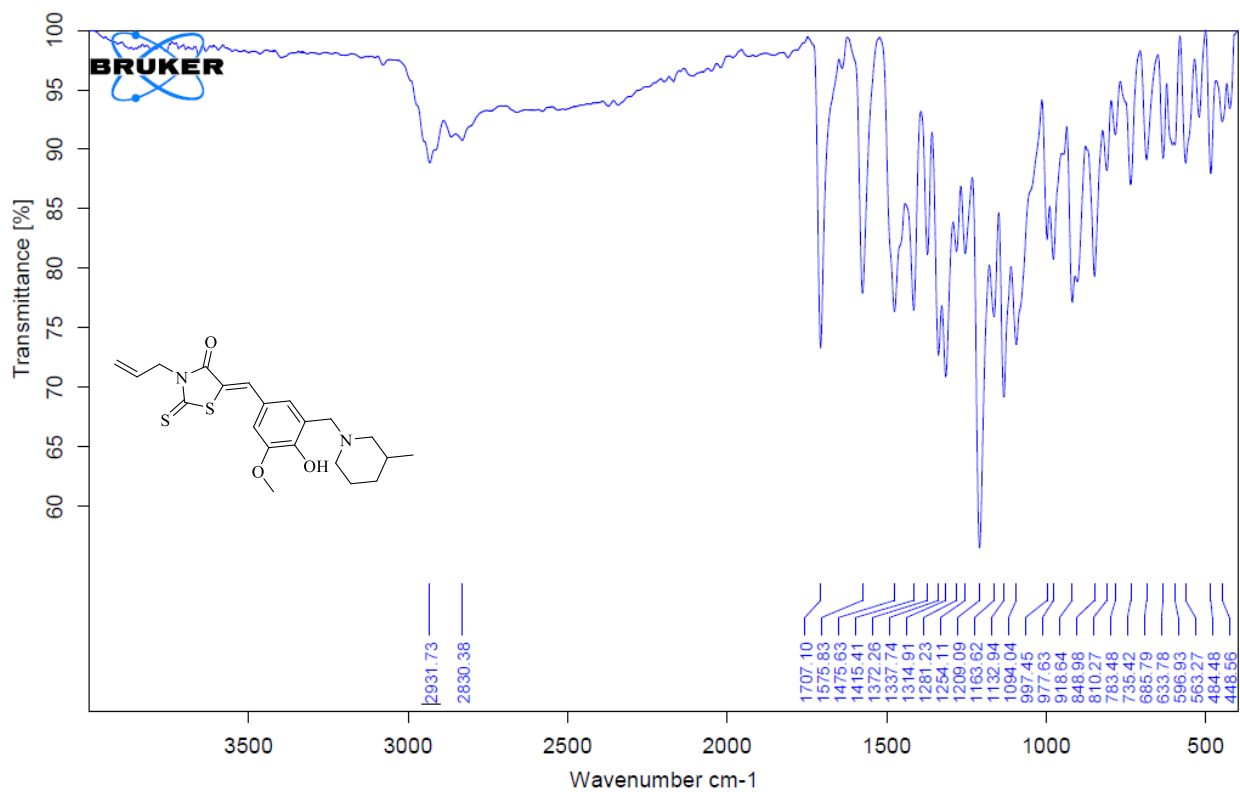

Figure S19. FTIR Spectrum of Compound 5

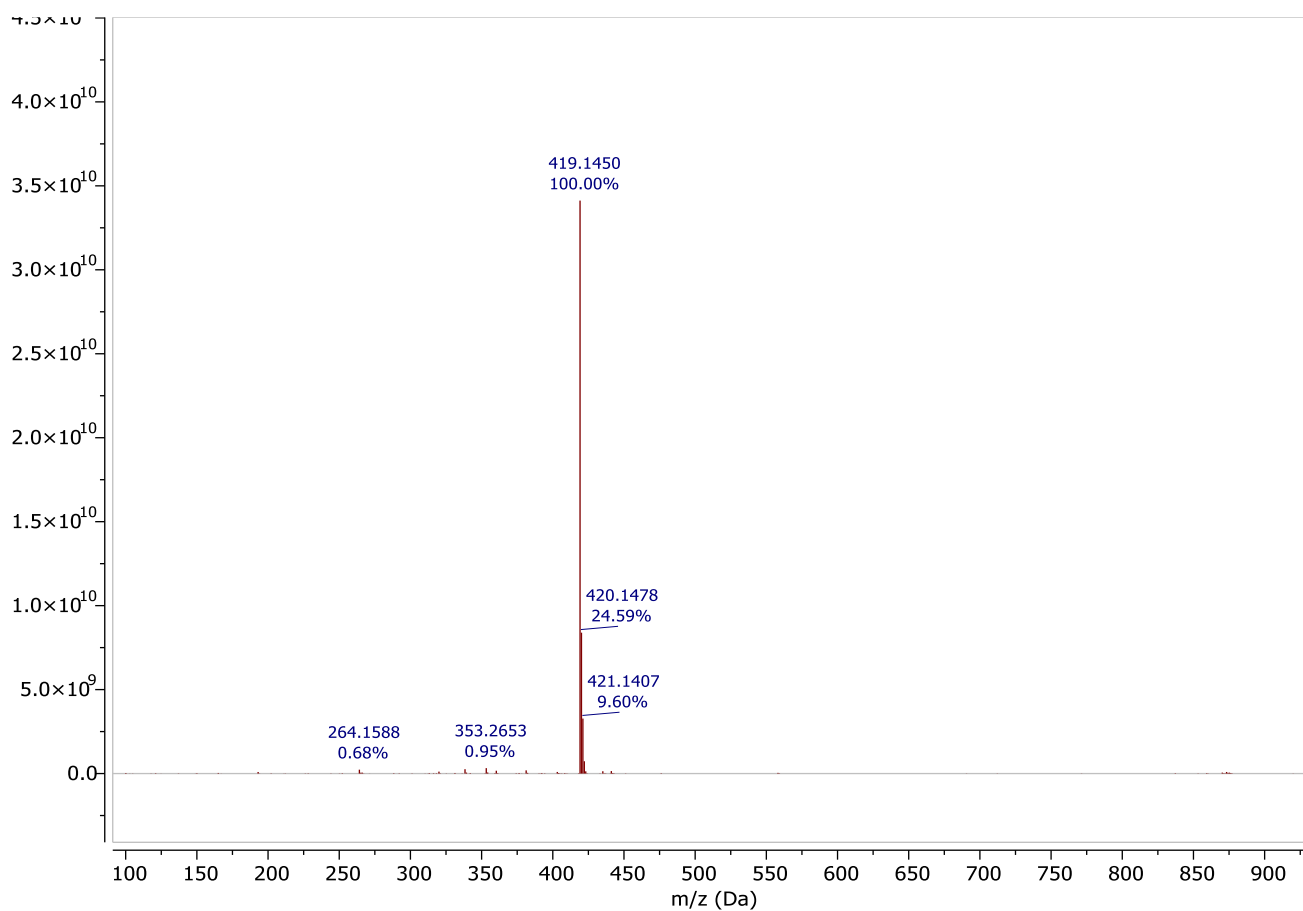

Figure S20. HRMS Spectrum of Compound 5

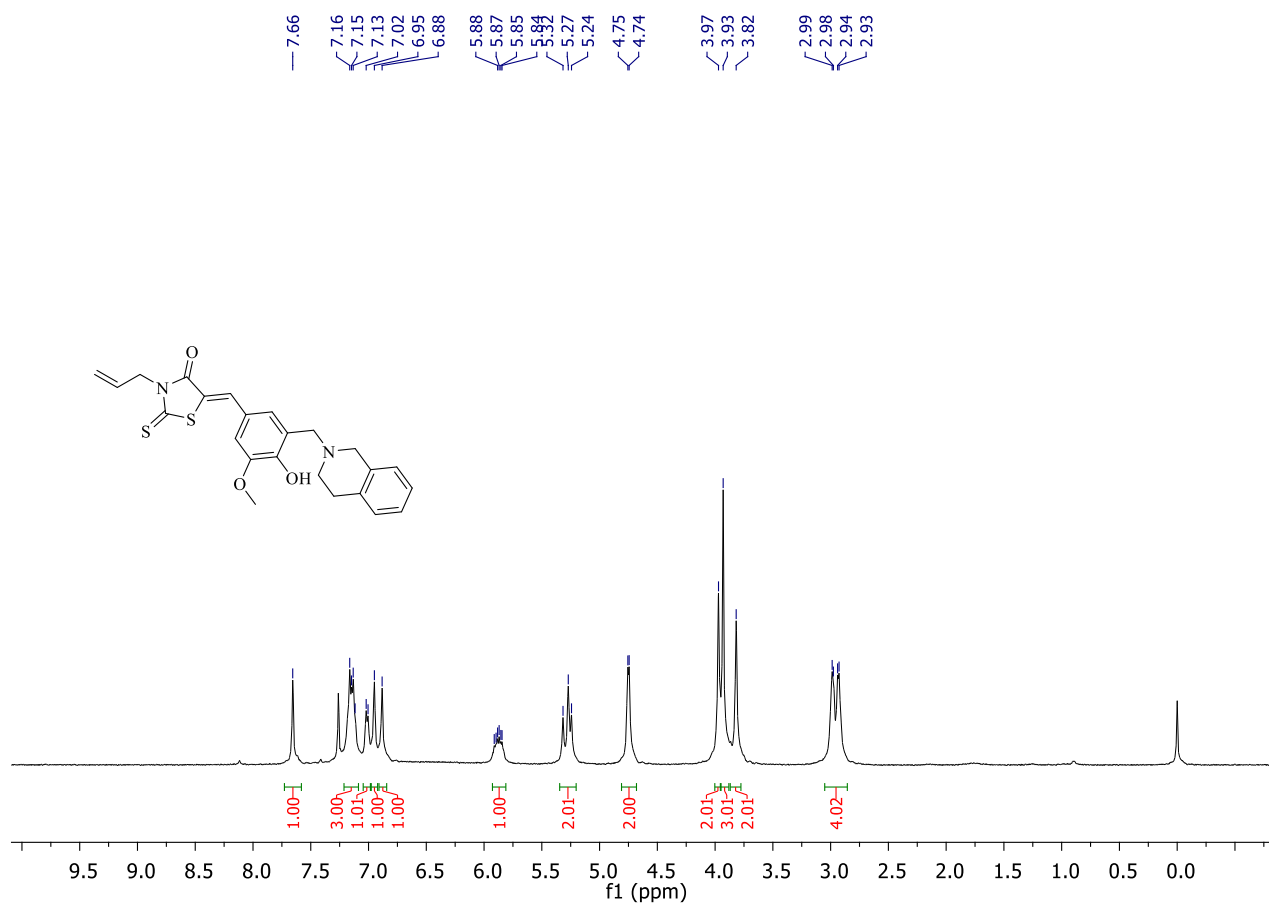

Figure S21. <sup>1</sup>H NMR Spectrum of Compound 6

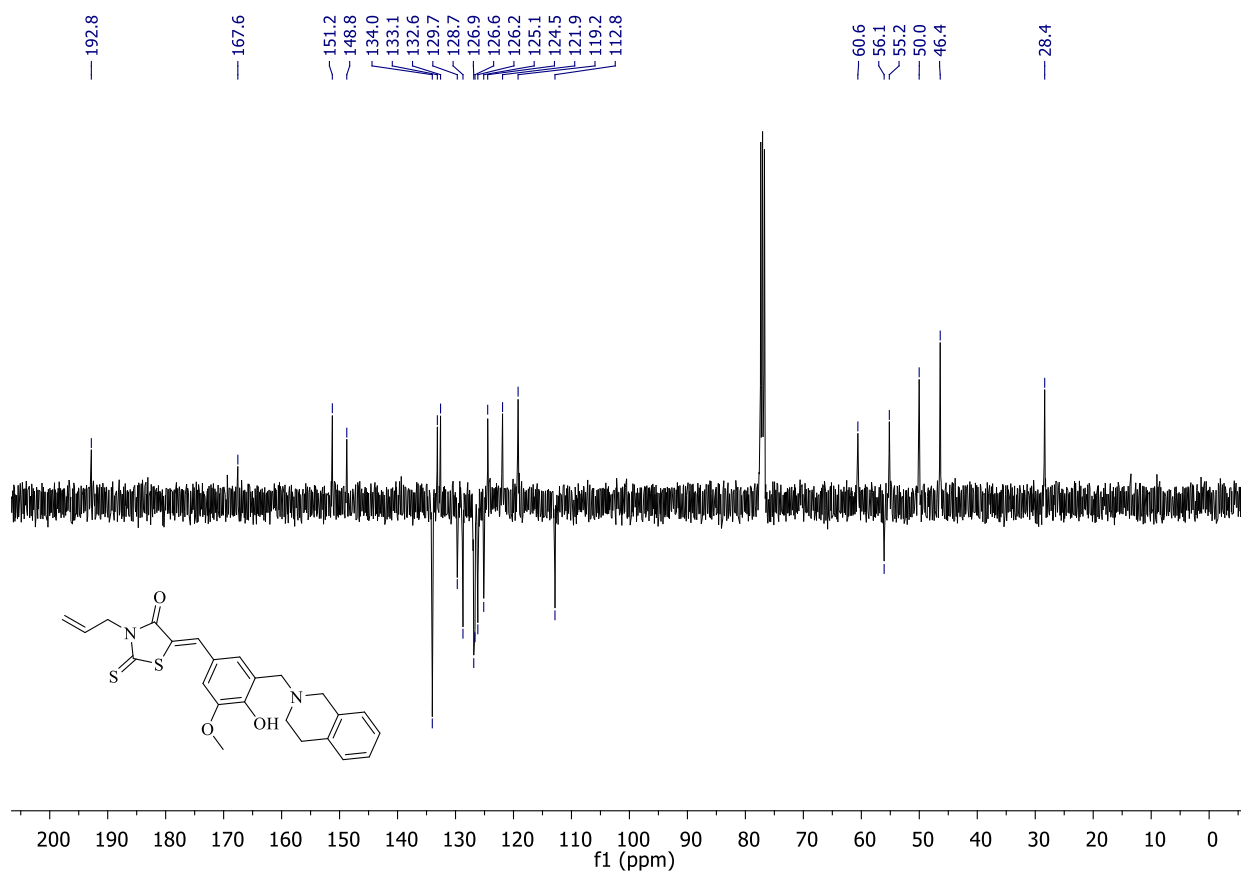

Figure S22. <sup>13</sup>C NMR Spectrum of Compound 6

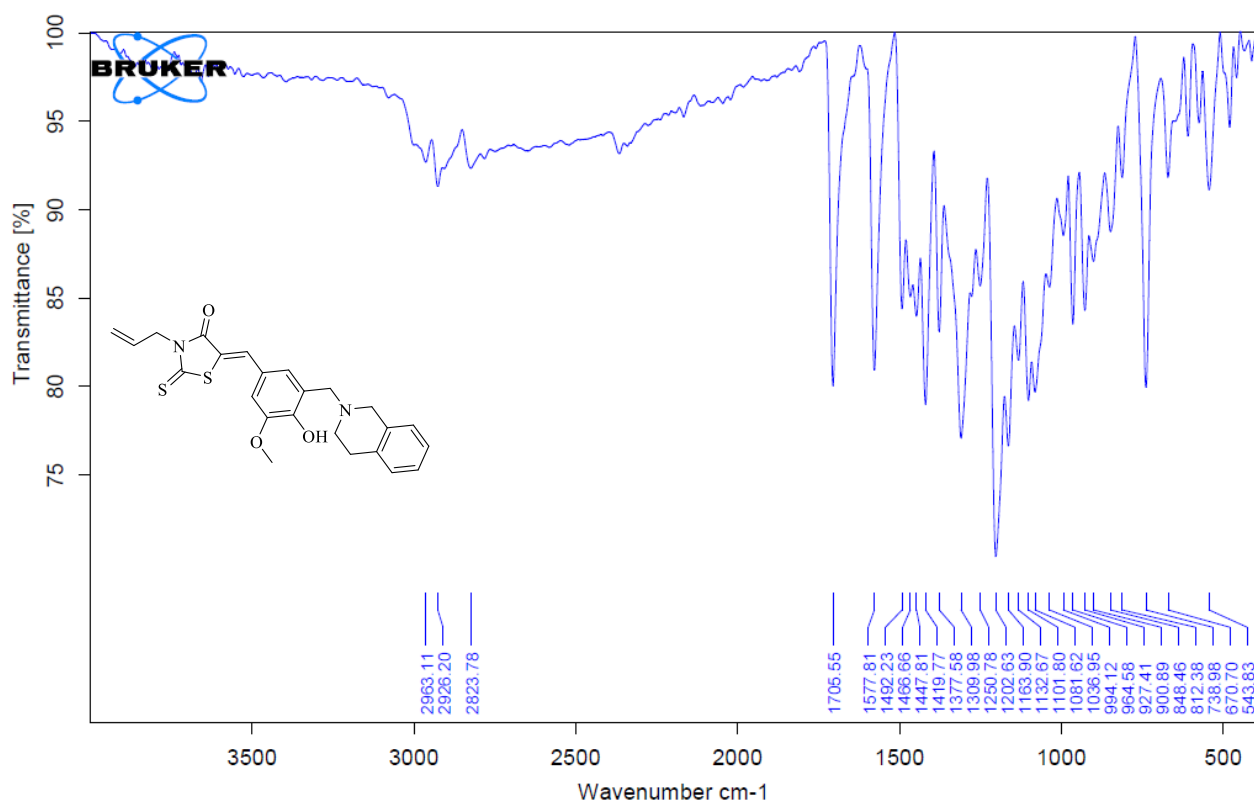

Figure S23. FTIR Spectrum of Compound 6

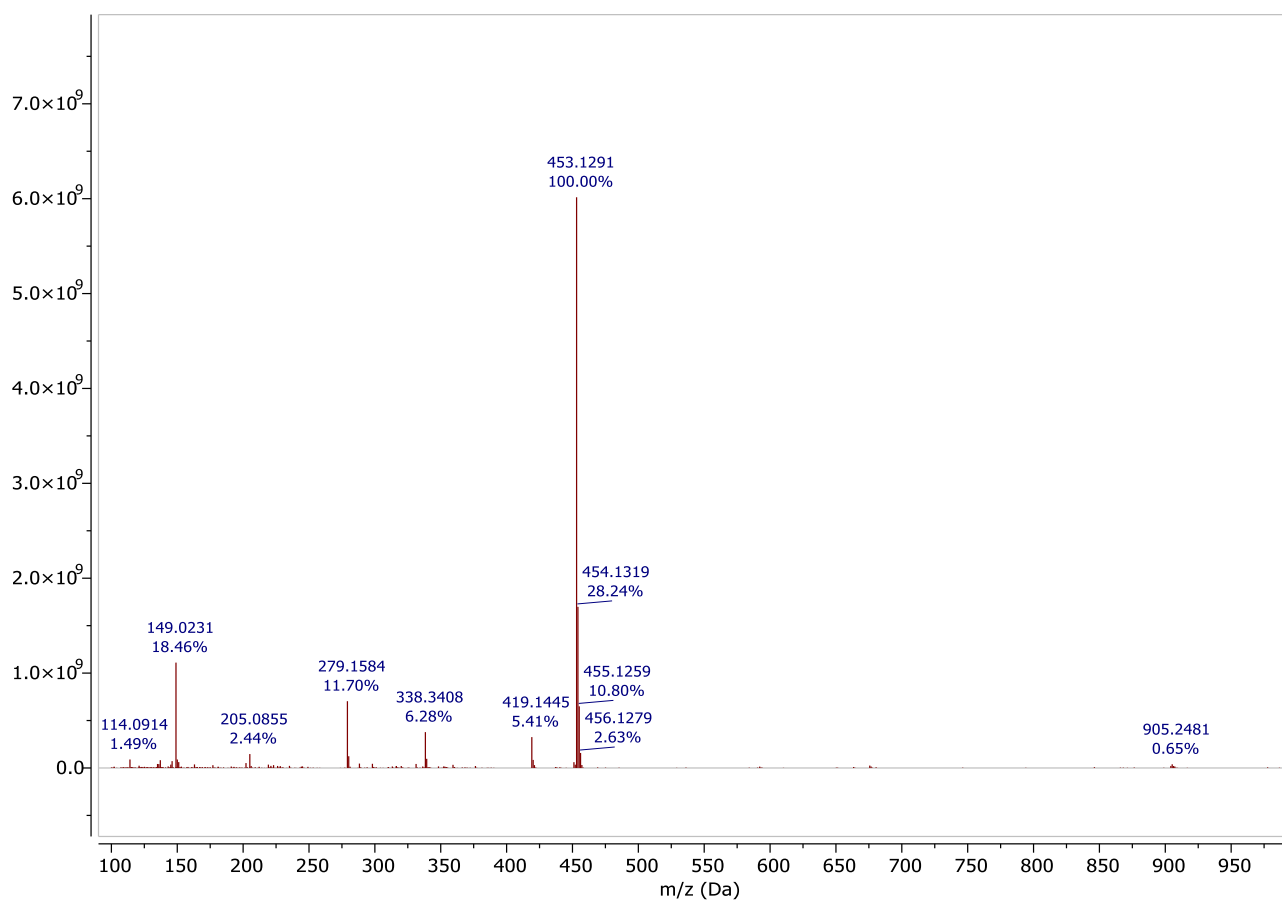

Figure S24. HRMS Spectrum of Compound 6

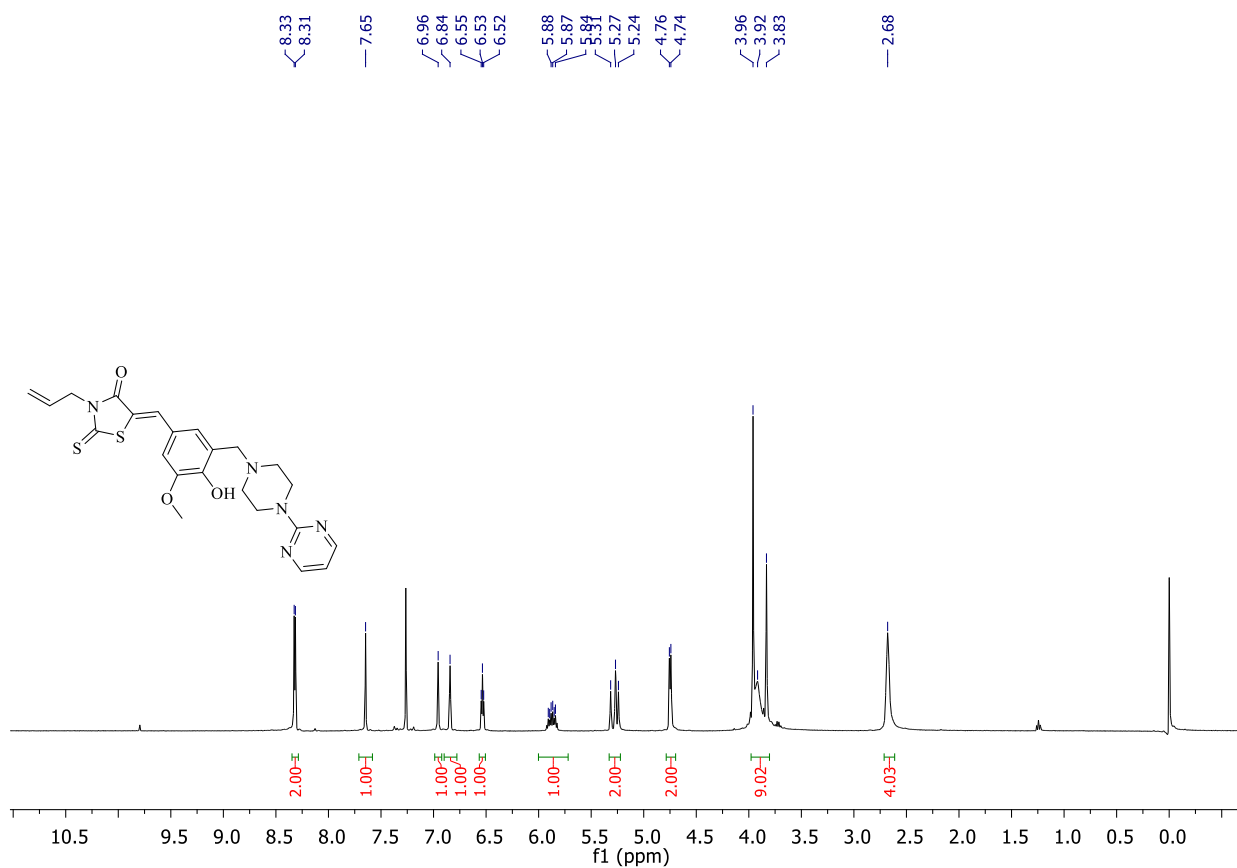

Figure S25. <sup>1</sup>H NMR Spectrum of Compound 7

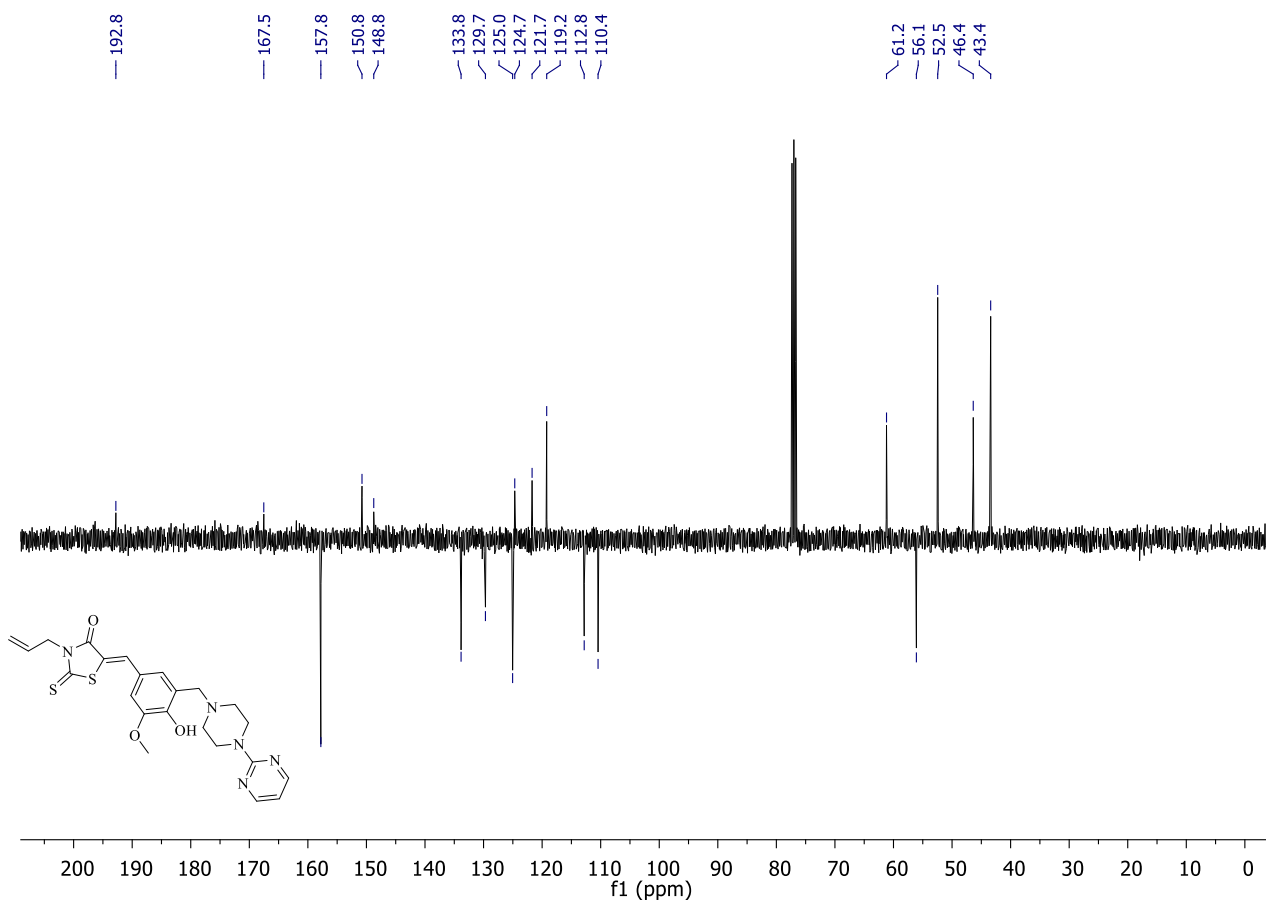

Figure S26. <sup>13</sup>C NMR Spectrum of Compound 7

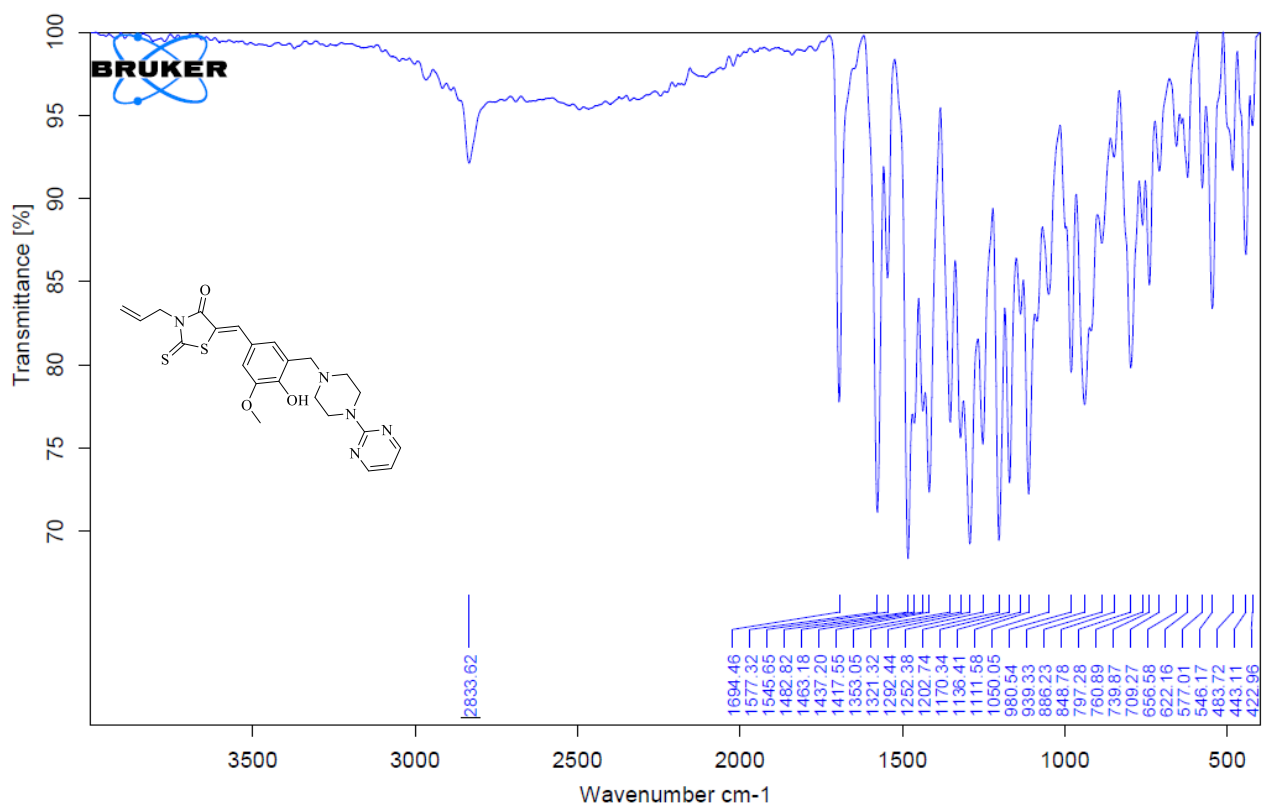

Figure S27. FTIR Spectrum of Compound 7

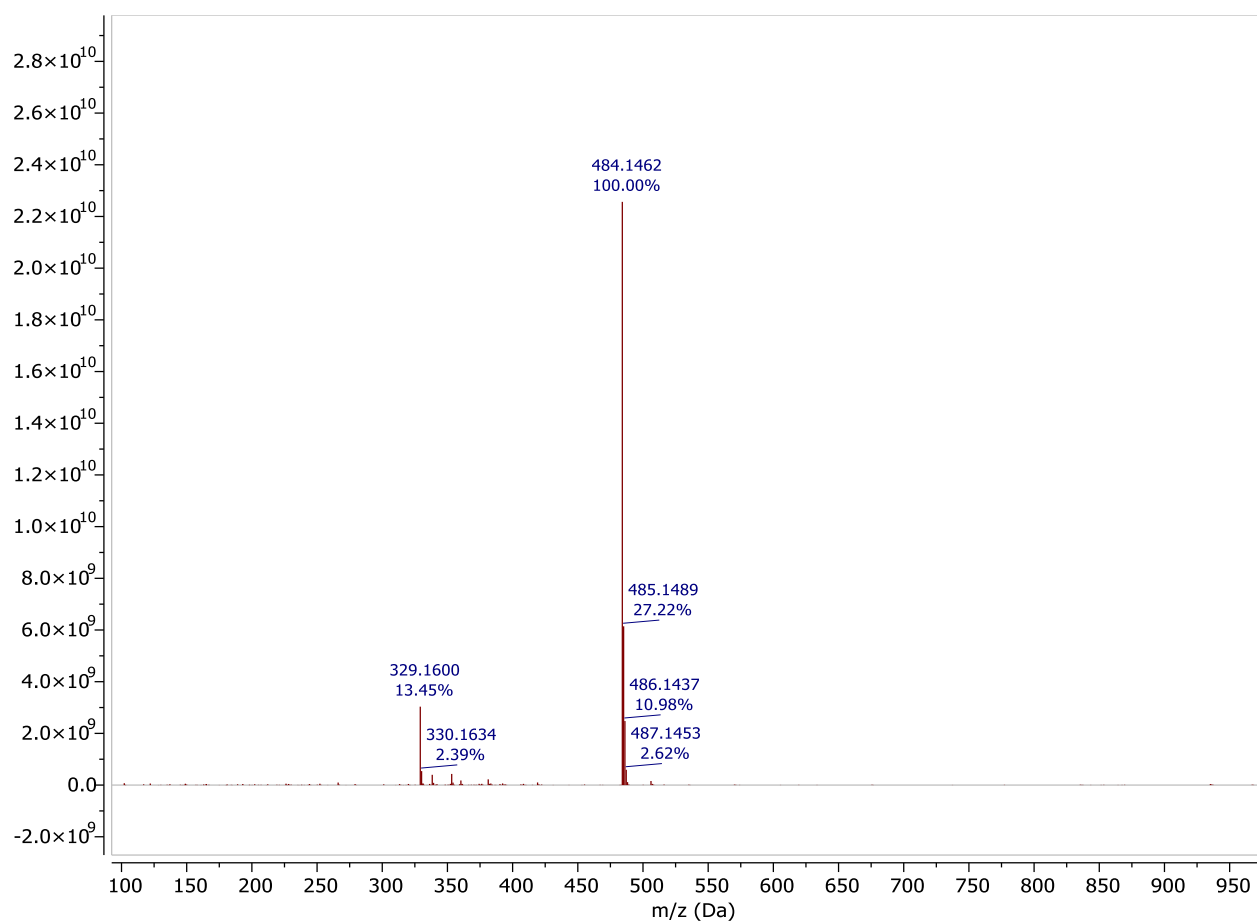

Figure S28. HRMS Spectrum of Compound 7



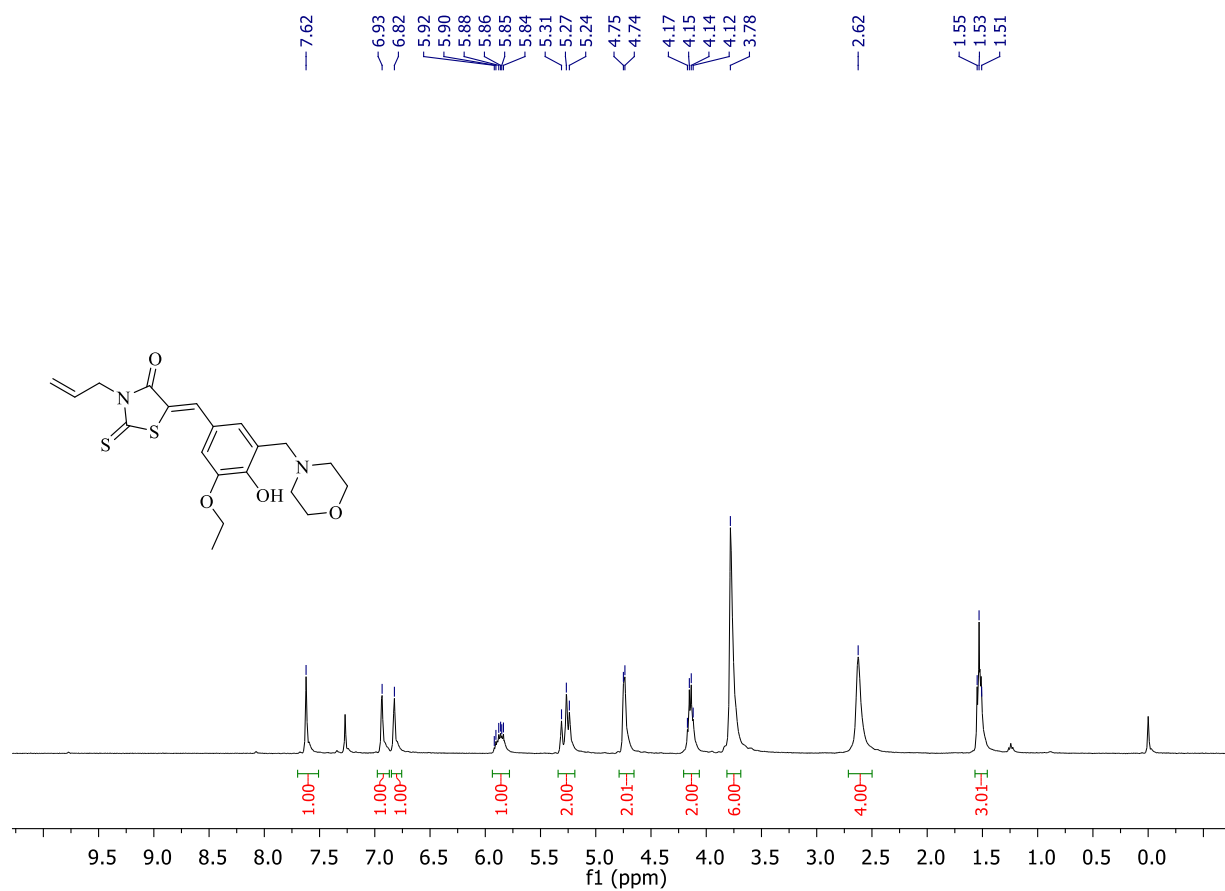

Figure S29. <sup>1</sup>H NMR Spectrum of Compound 8

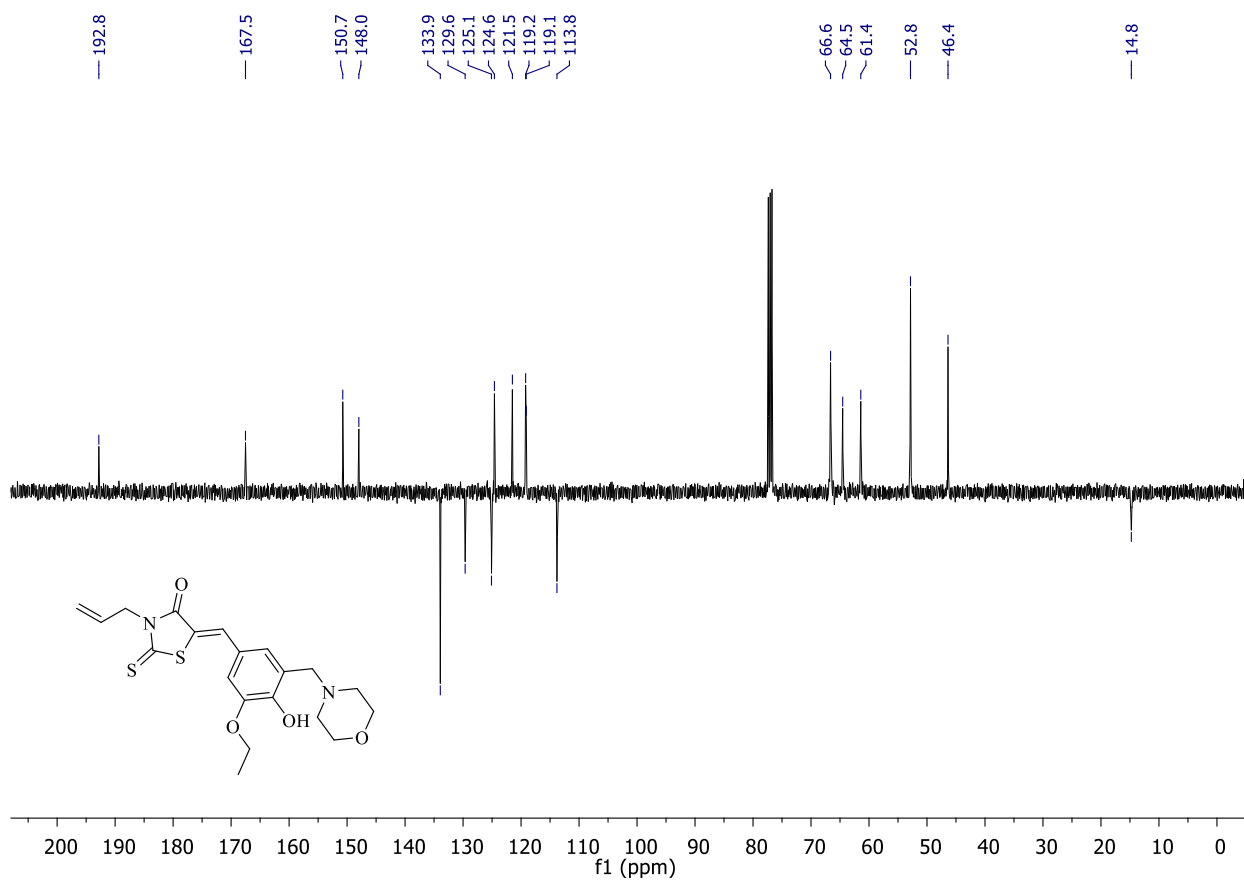

Figure S30. <sup>13</sup>C NMR Spectrum of Compound 8

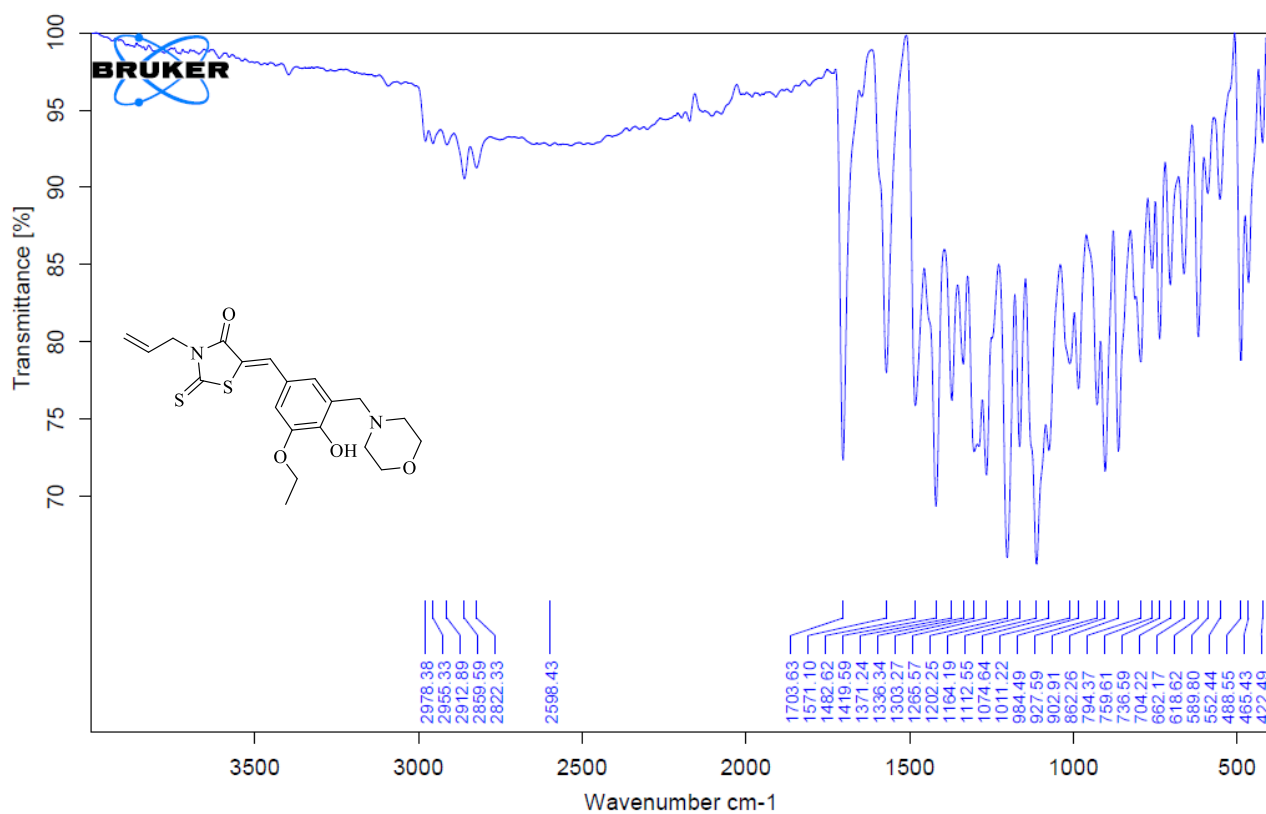

Figure S31. FTIR Spectrum of Compound 8

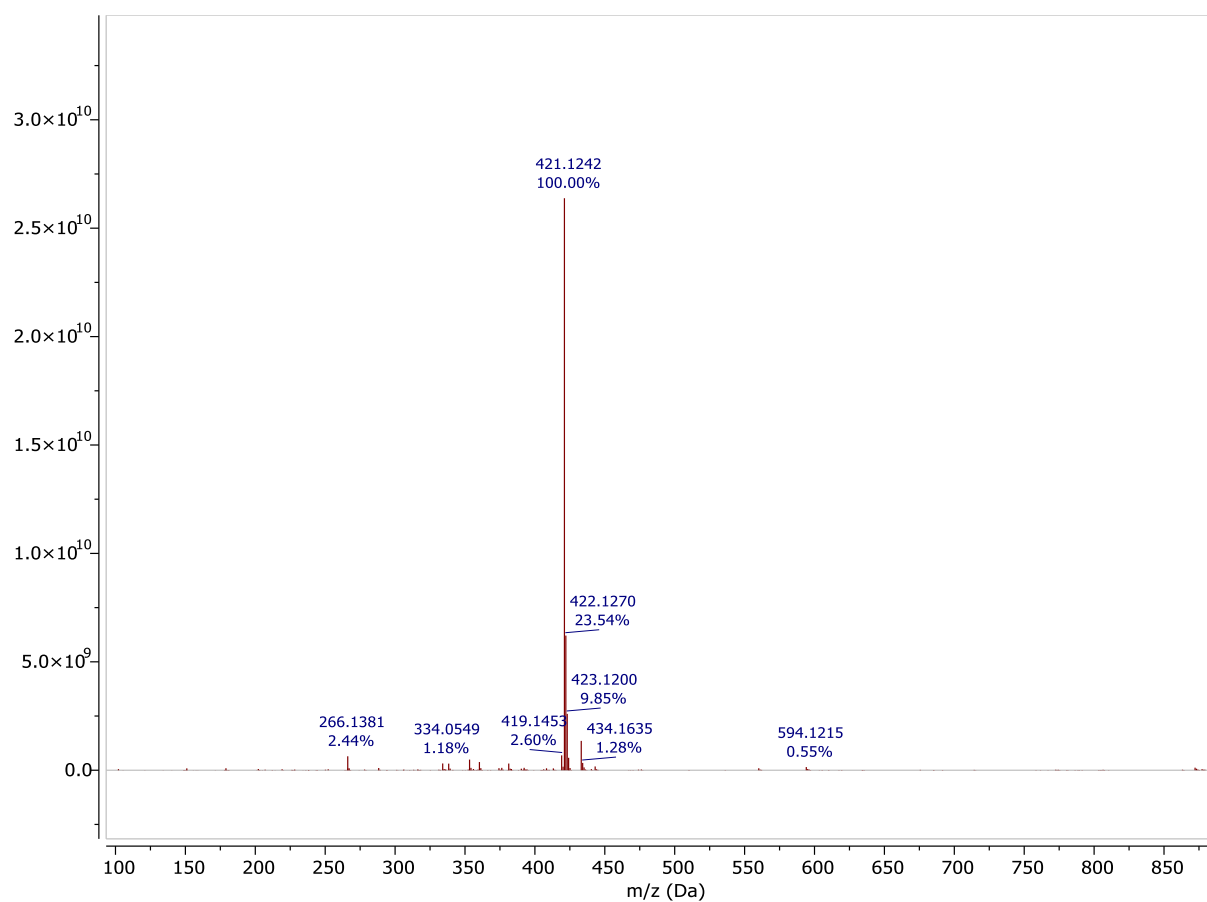

Figure S32. HRMS Spectrum of Compound 8

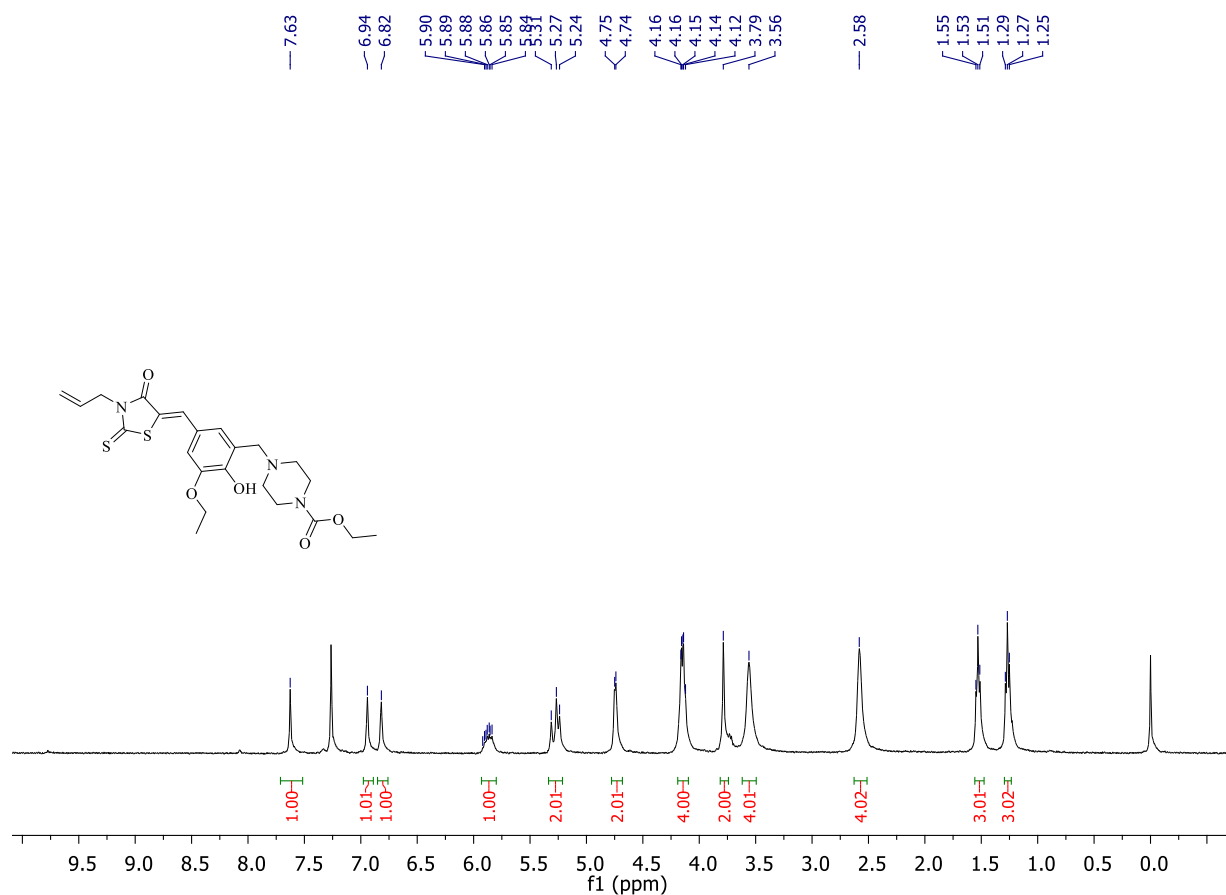

Figure S33. <sup>1</sup>H NMR Spectrum of Compound 9

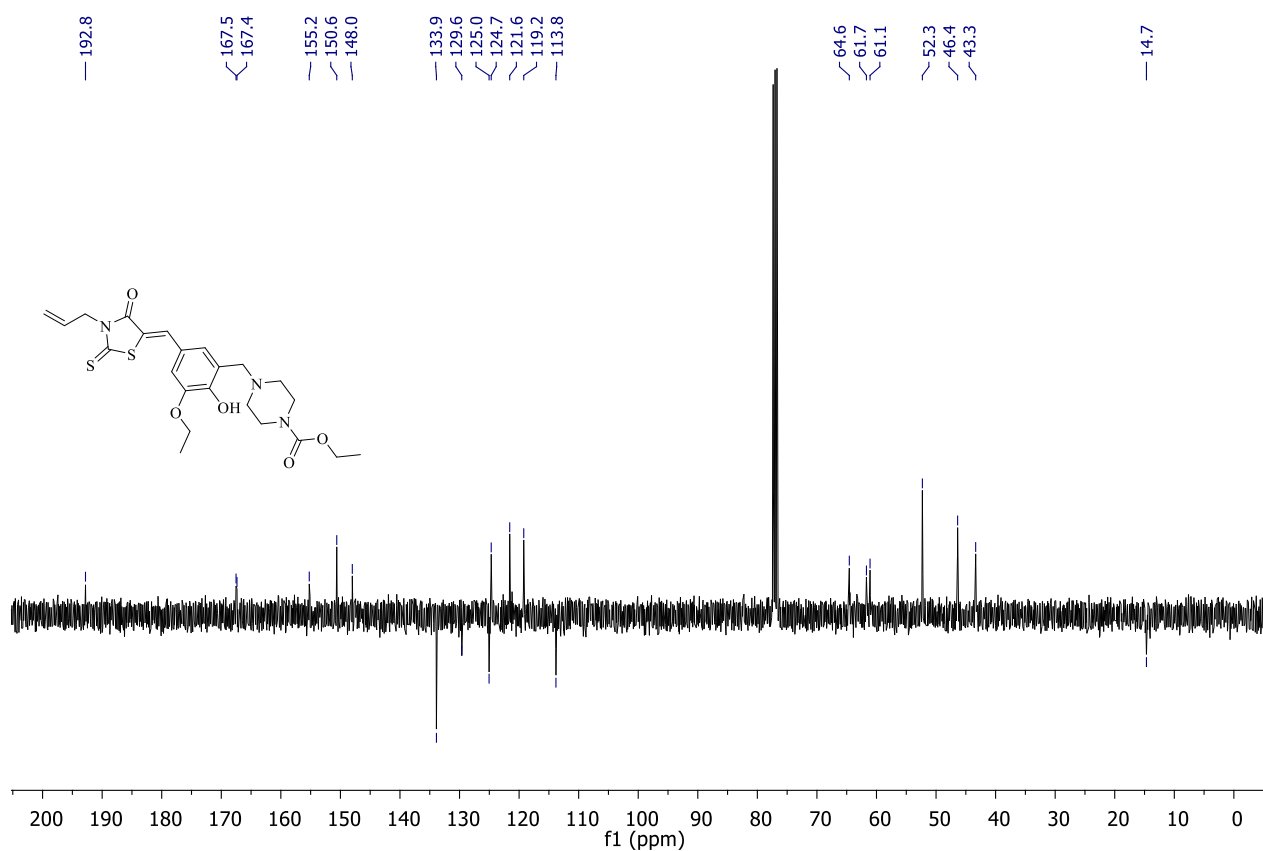

Figure S34. <sup>13</sup>C NMR Spectrum of Compound 9

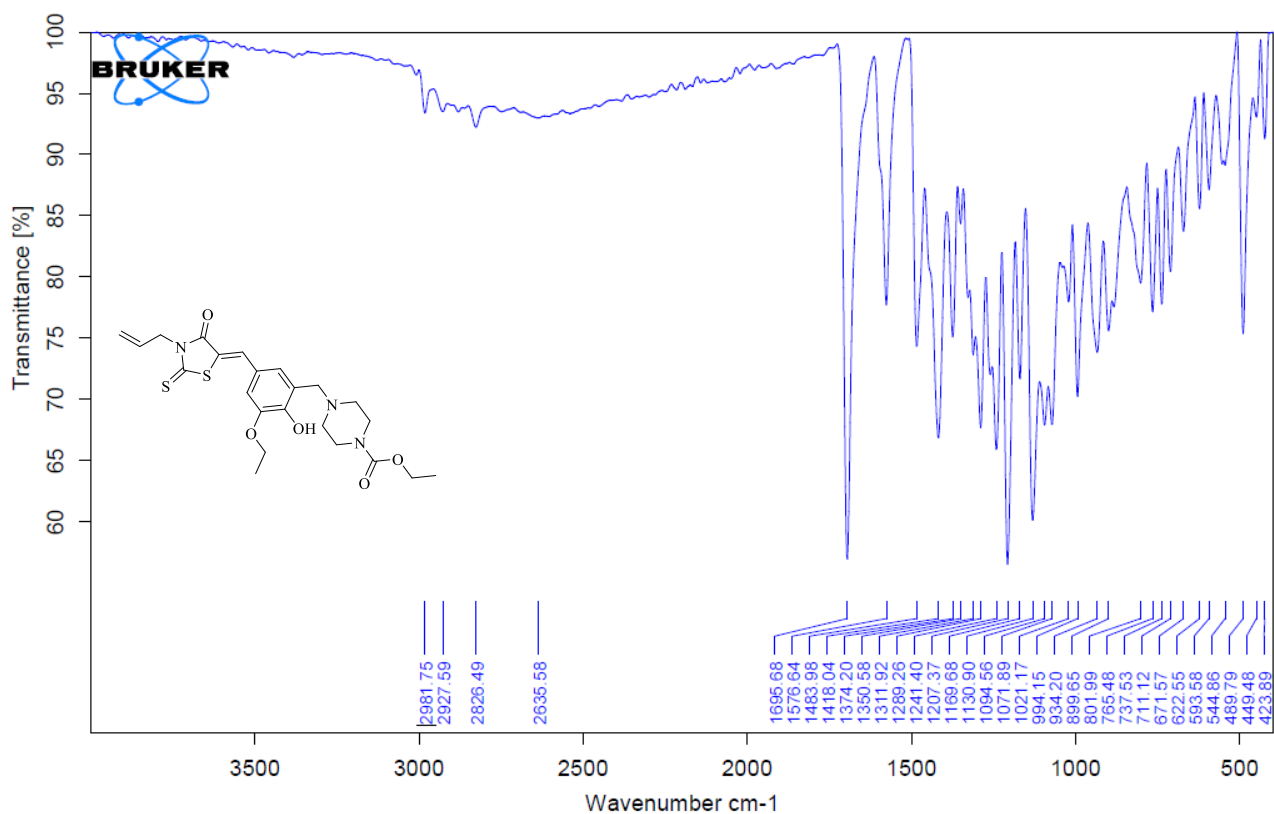

Figure S35. FTIR Spectrum of Compound 9

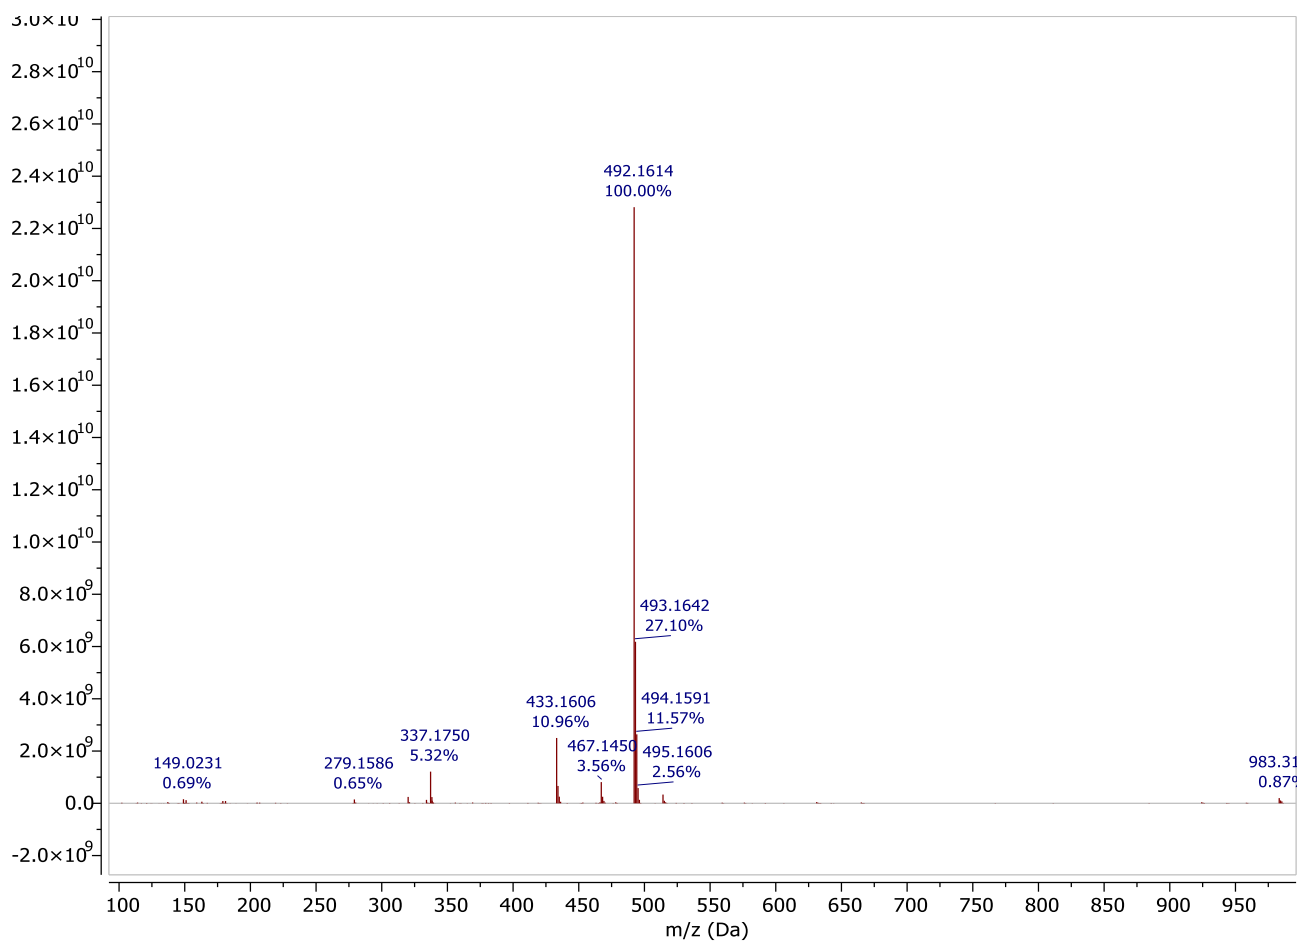

Figure S36. HRMS Spectrum of Compound 9

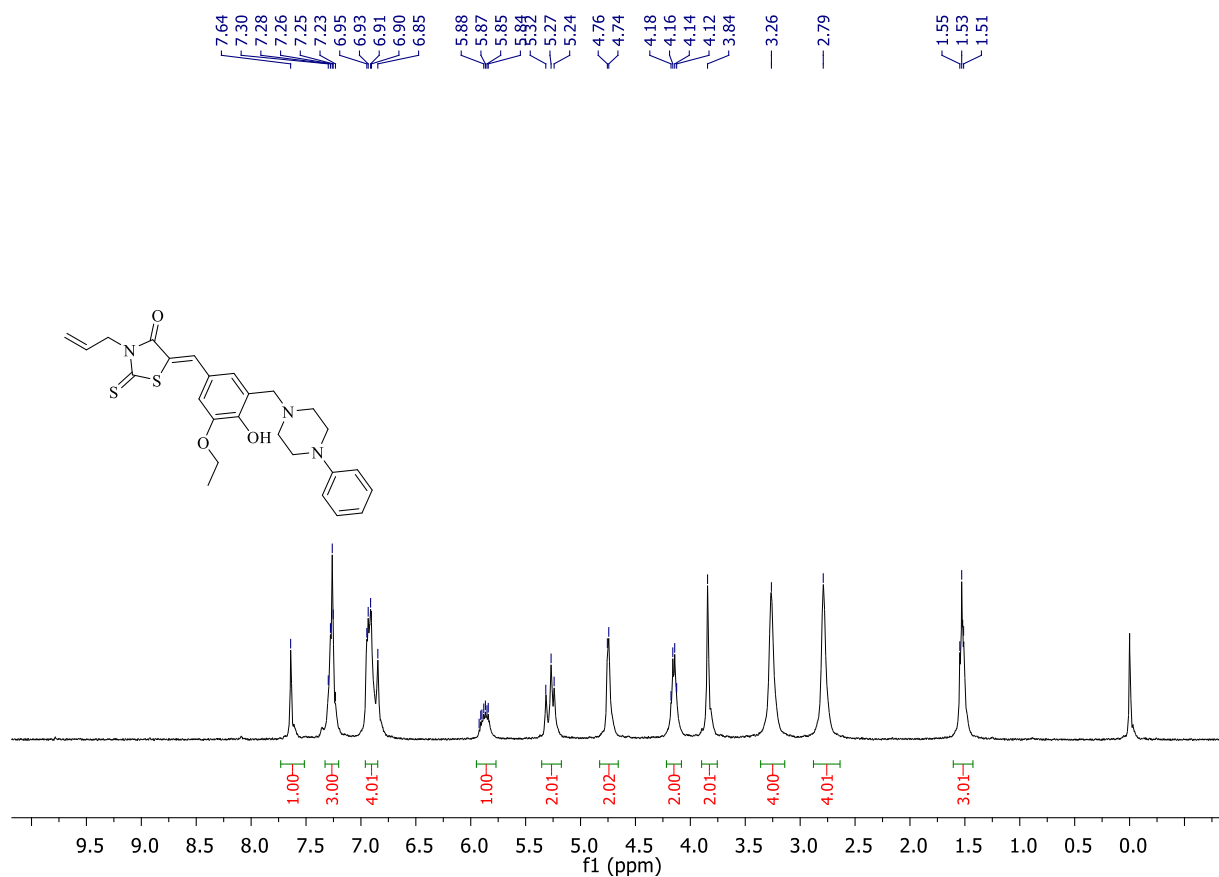

Figure S37. <sup>1</sup>H NMR Spectrum of Compound 10

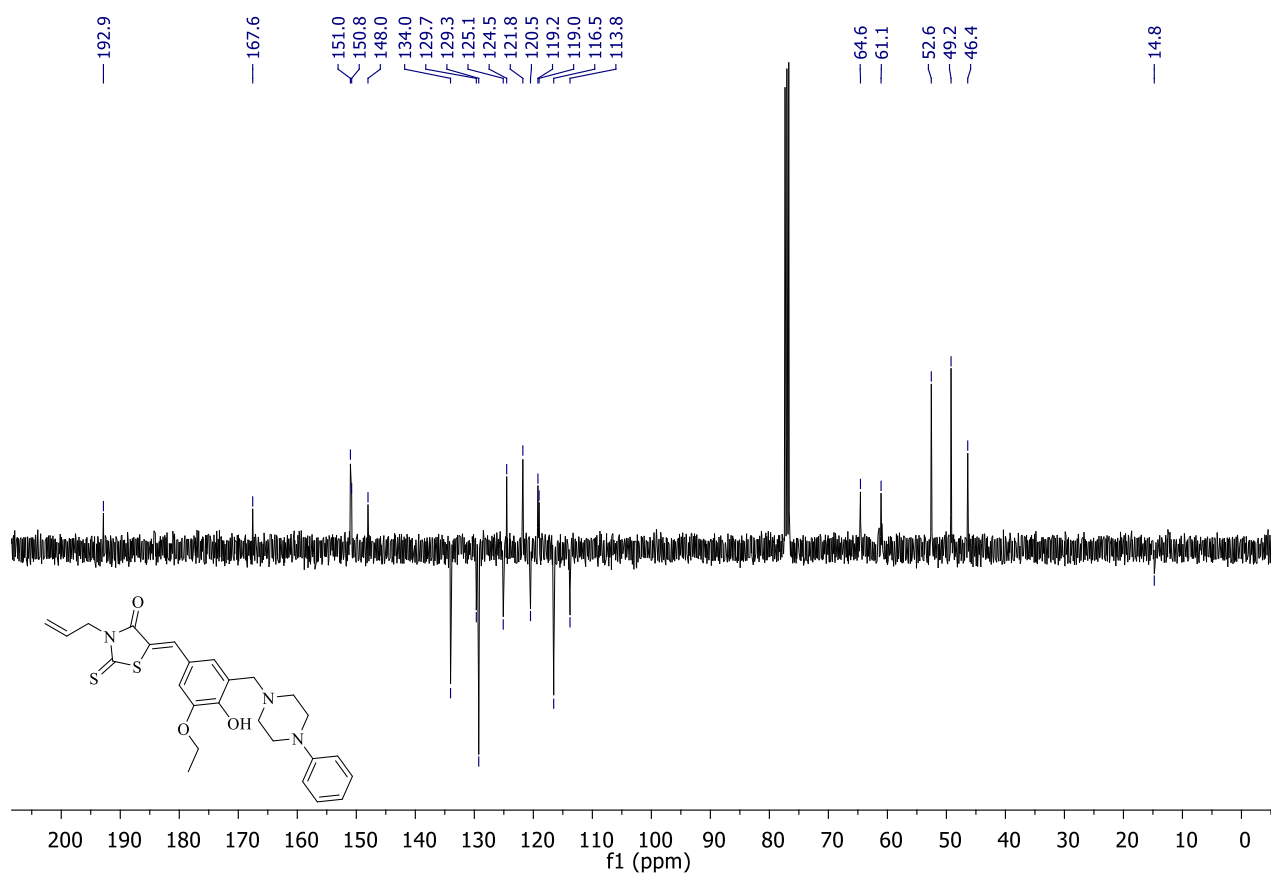

Figure S38. <sup>13</sup>C NMR Spectrum of Compound 10

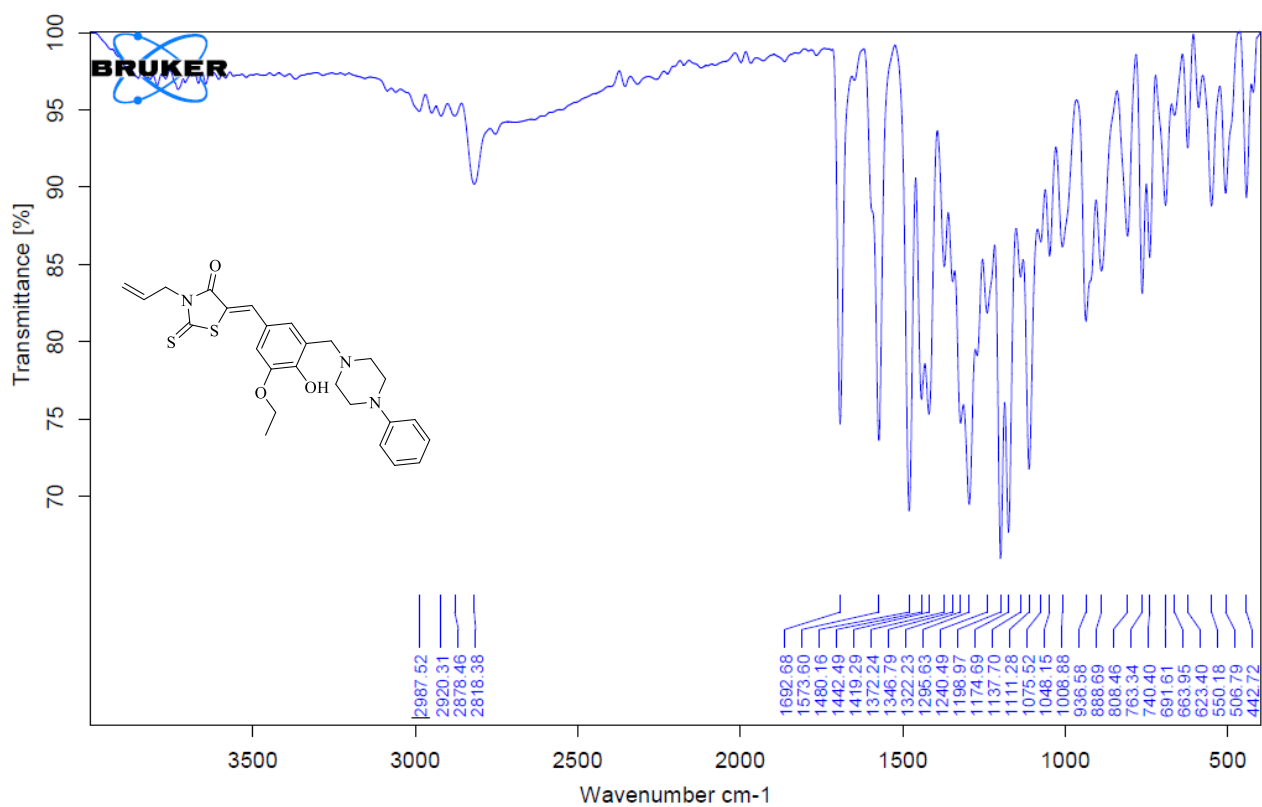

Figure S39. FTIR Spectrum of Compound 10

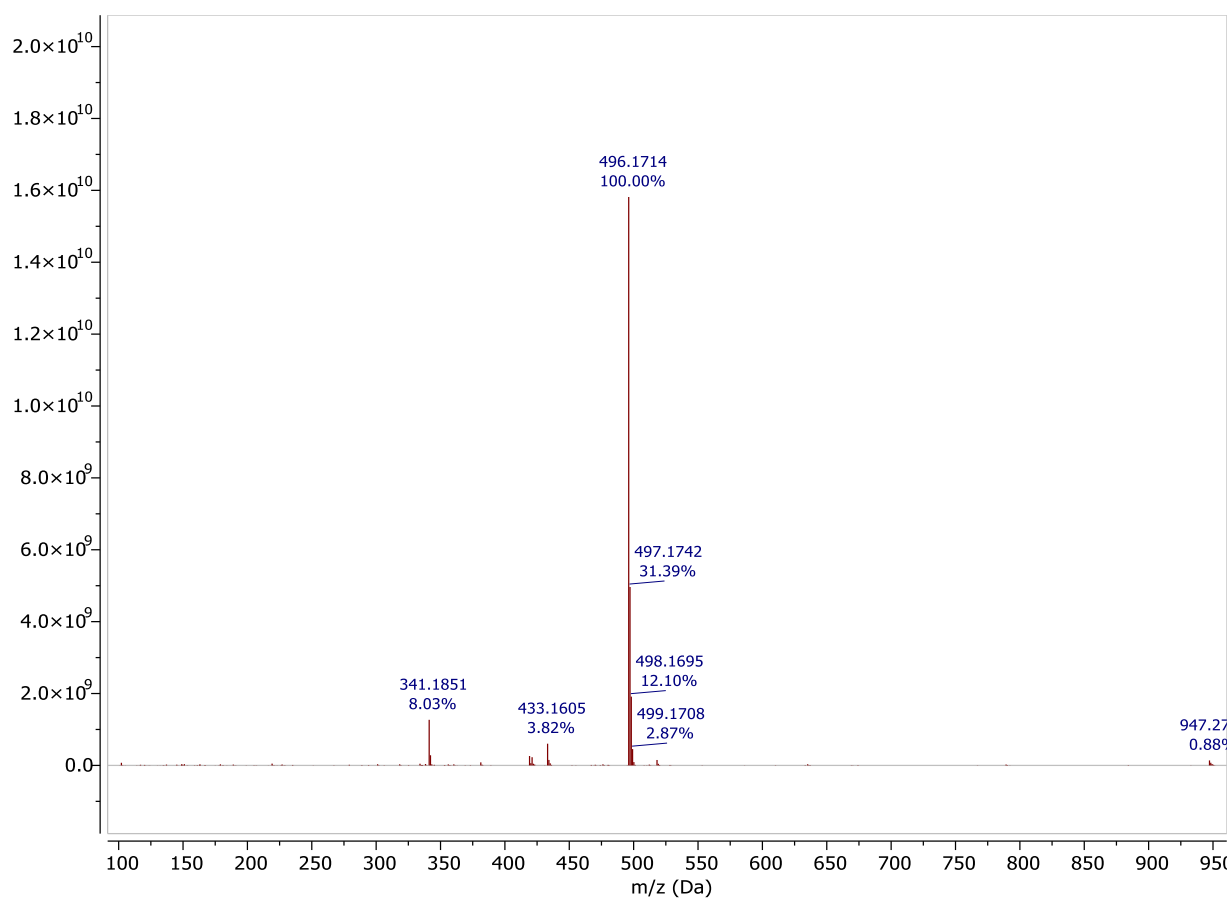

Figure S40. HRMS Spectrum of Compound 10

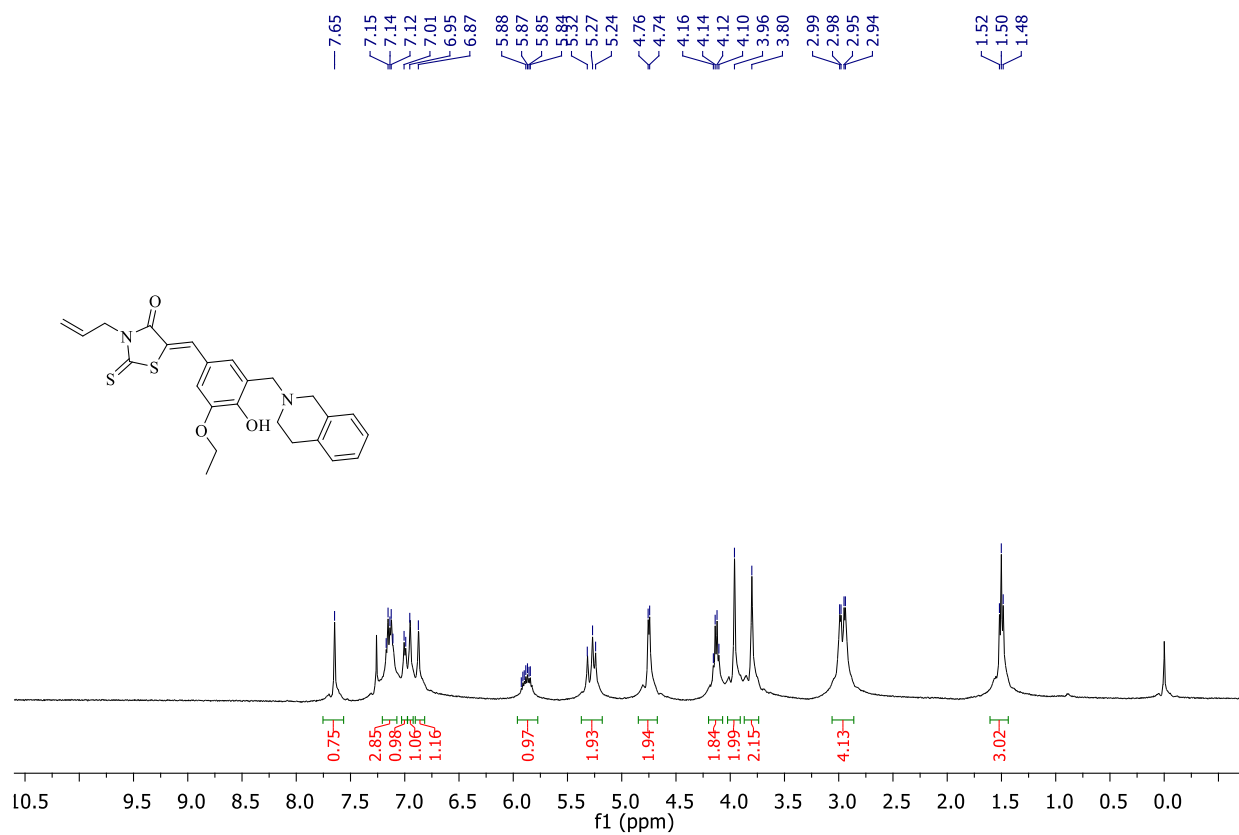

Figure S41. <sup>1</sup>H NMR Spectrum of Compound 11

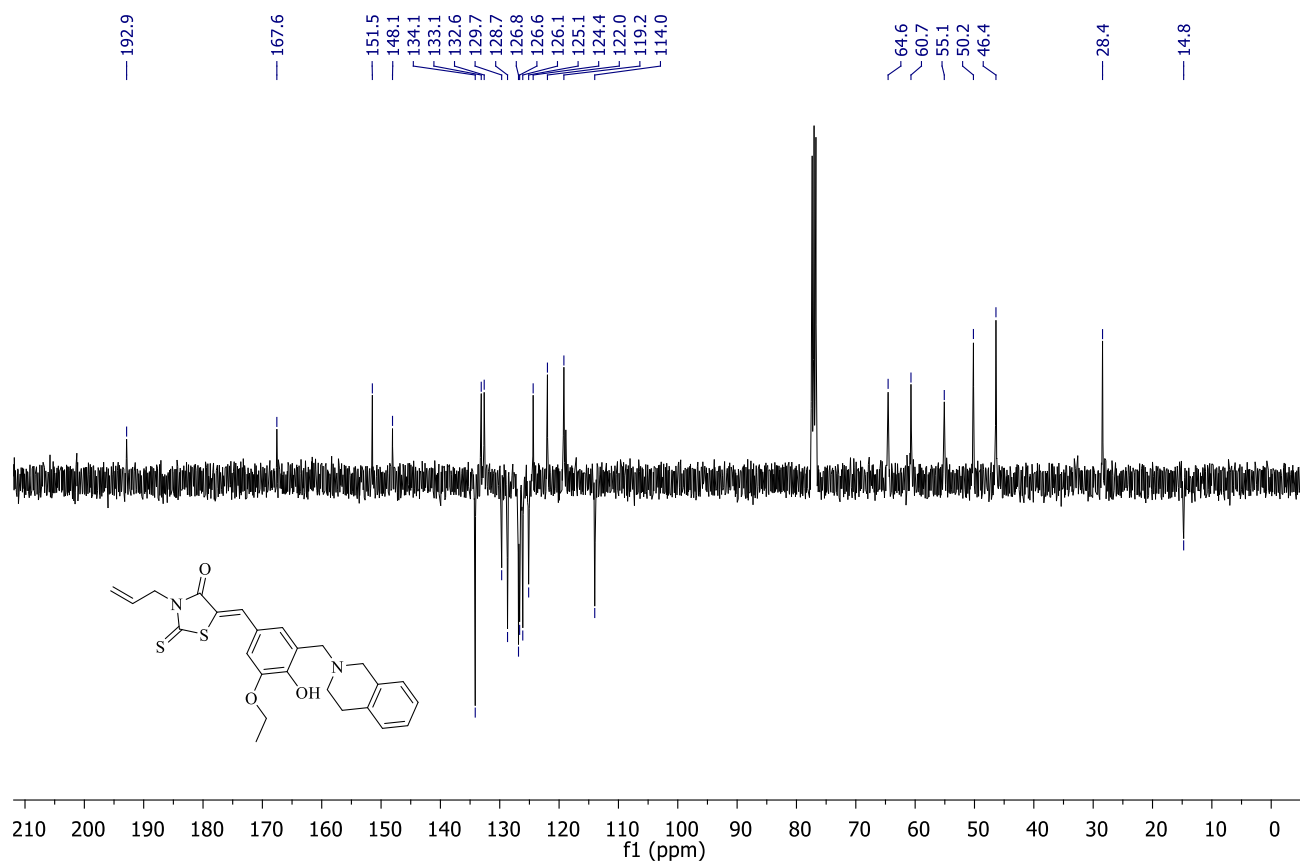

Figure S42. <sup>13</sup>C NMR Spectrum of Compound 11

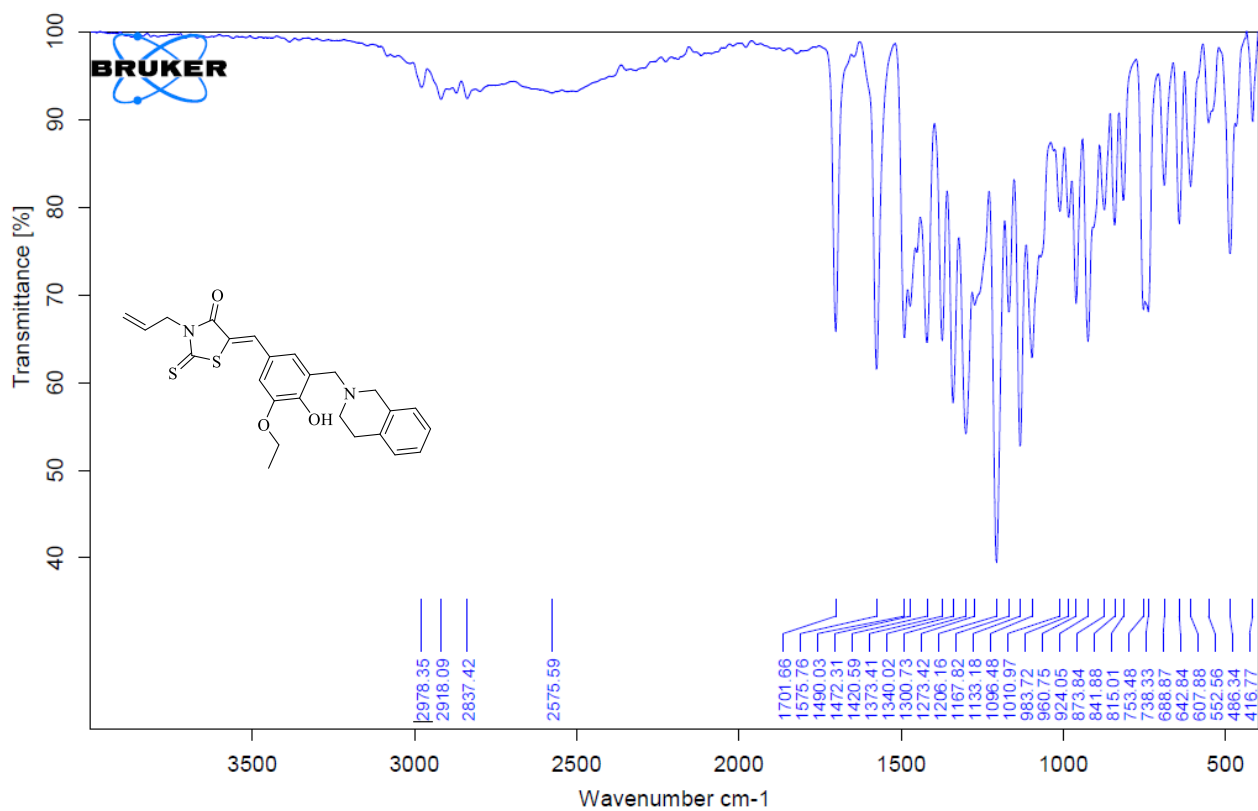

Figure S43. FTIR Spectrum of Compound 11

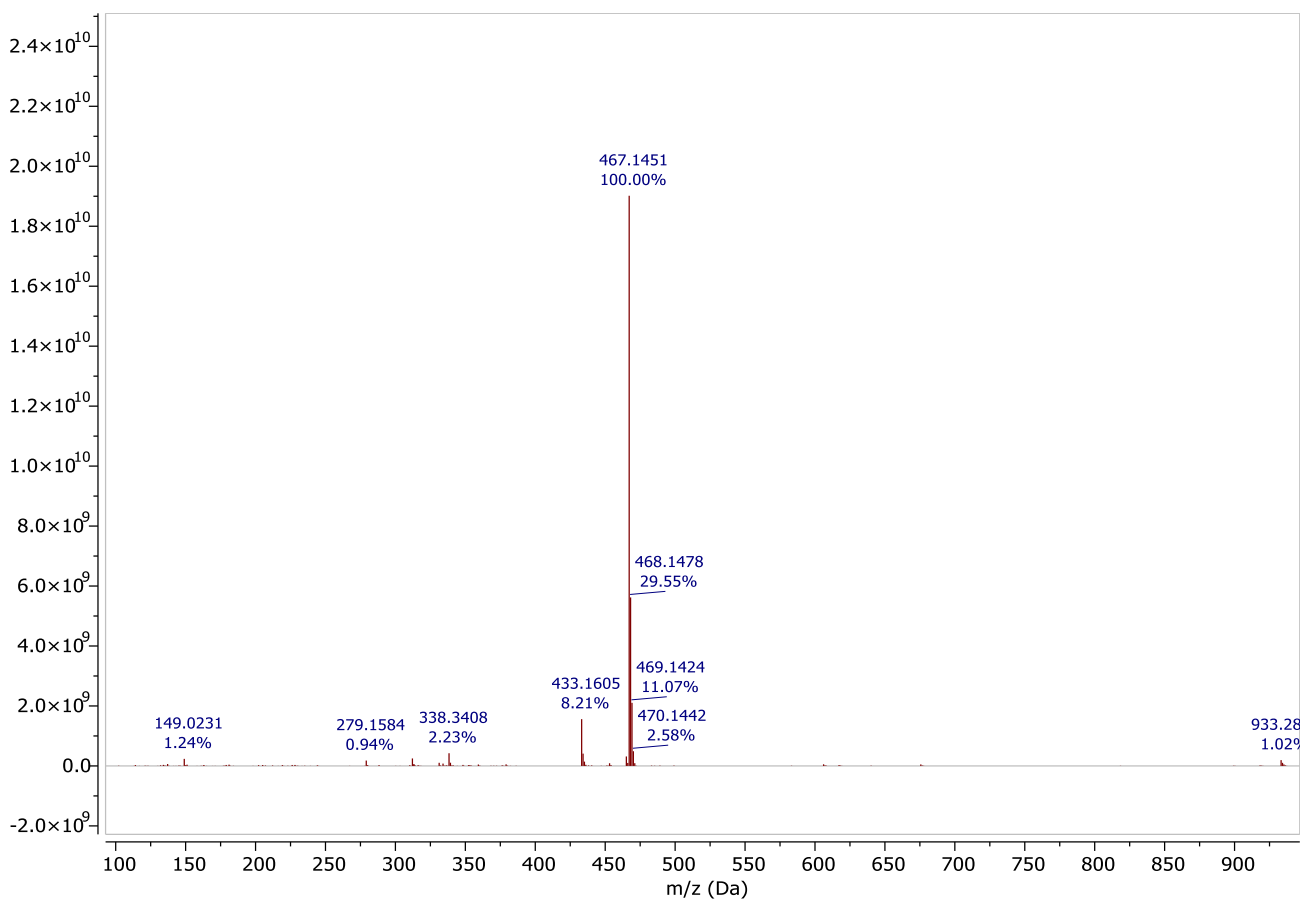

Figure S44. HRMS Spectrum of Compound 11



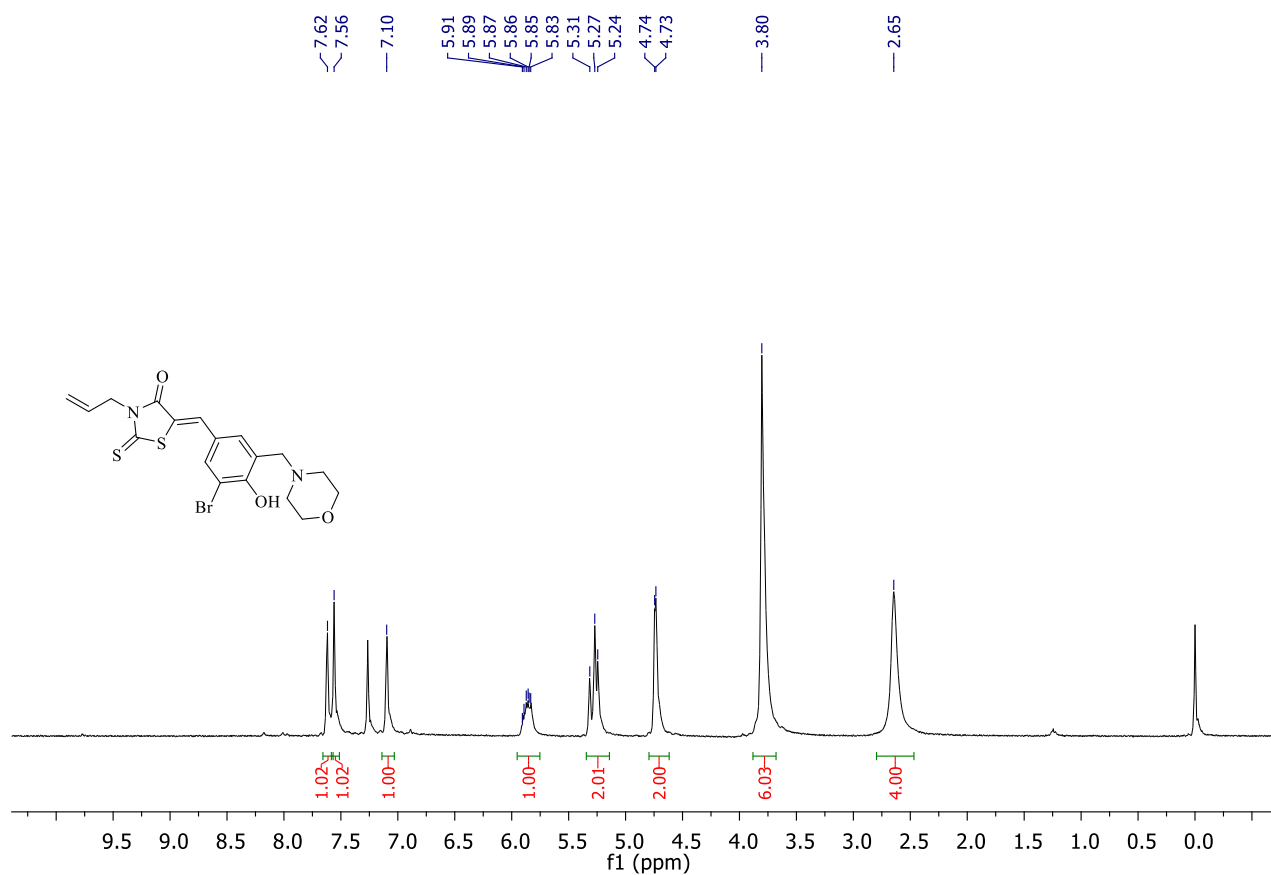

Figure S45. <sup>1</sup>H NMR Spectrum of Compound 12

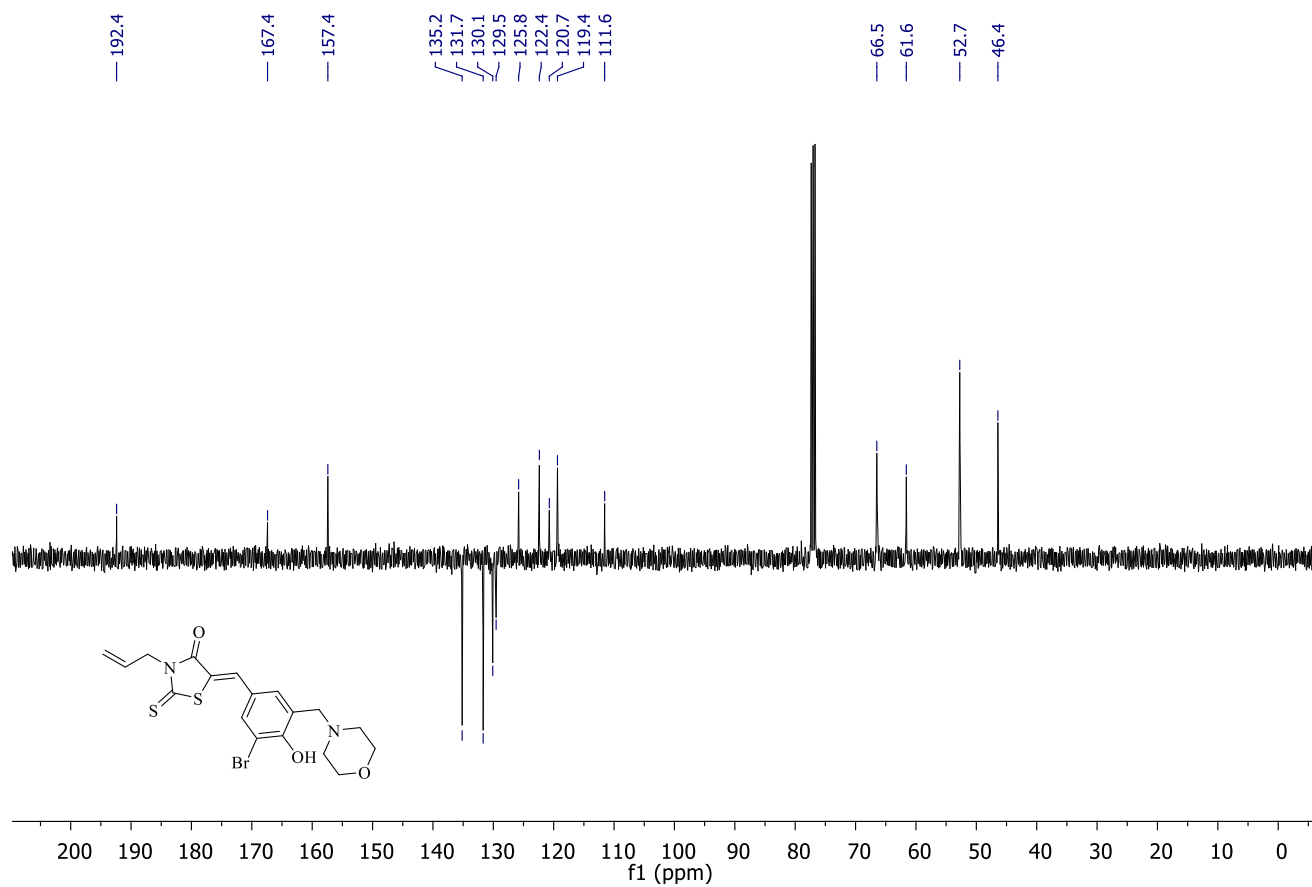

Figure S46. <sup>13</sup>C NMR Spectrum of Compound 12

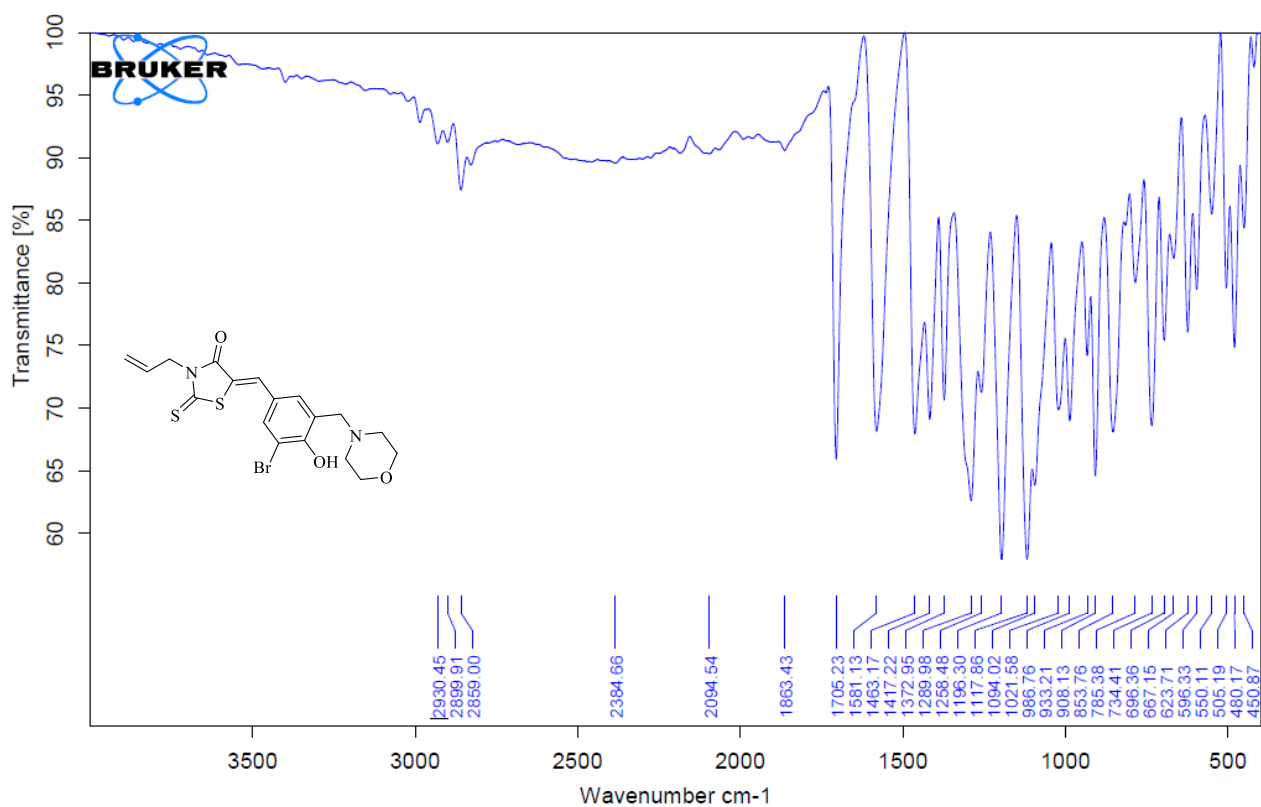

Figure S47. FTIR Spectrum of Compound 12

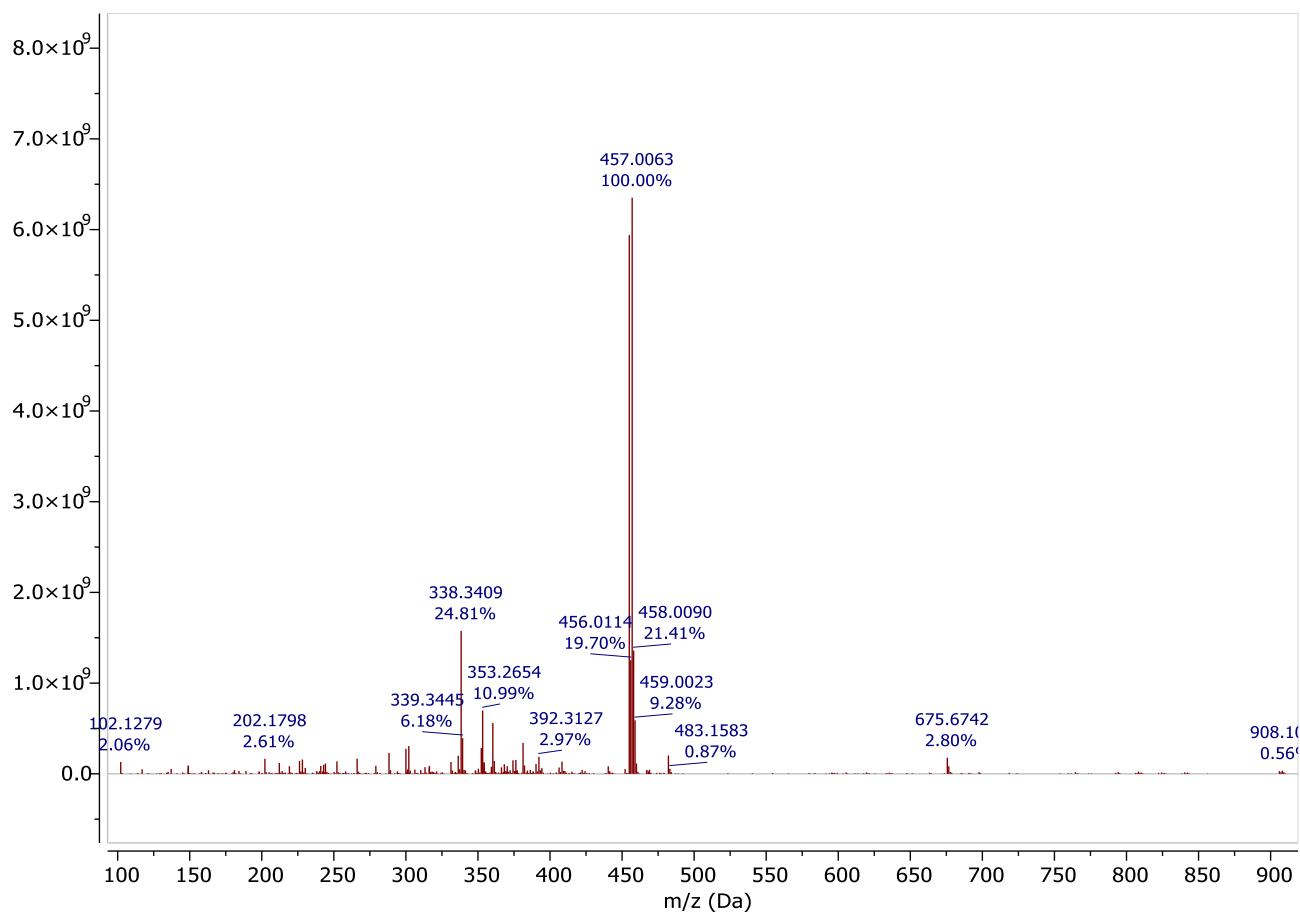

Figure S48. HRMS Spectrum of Compound 12

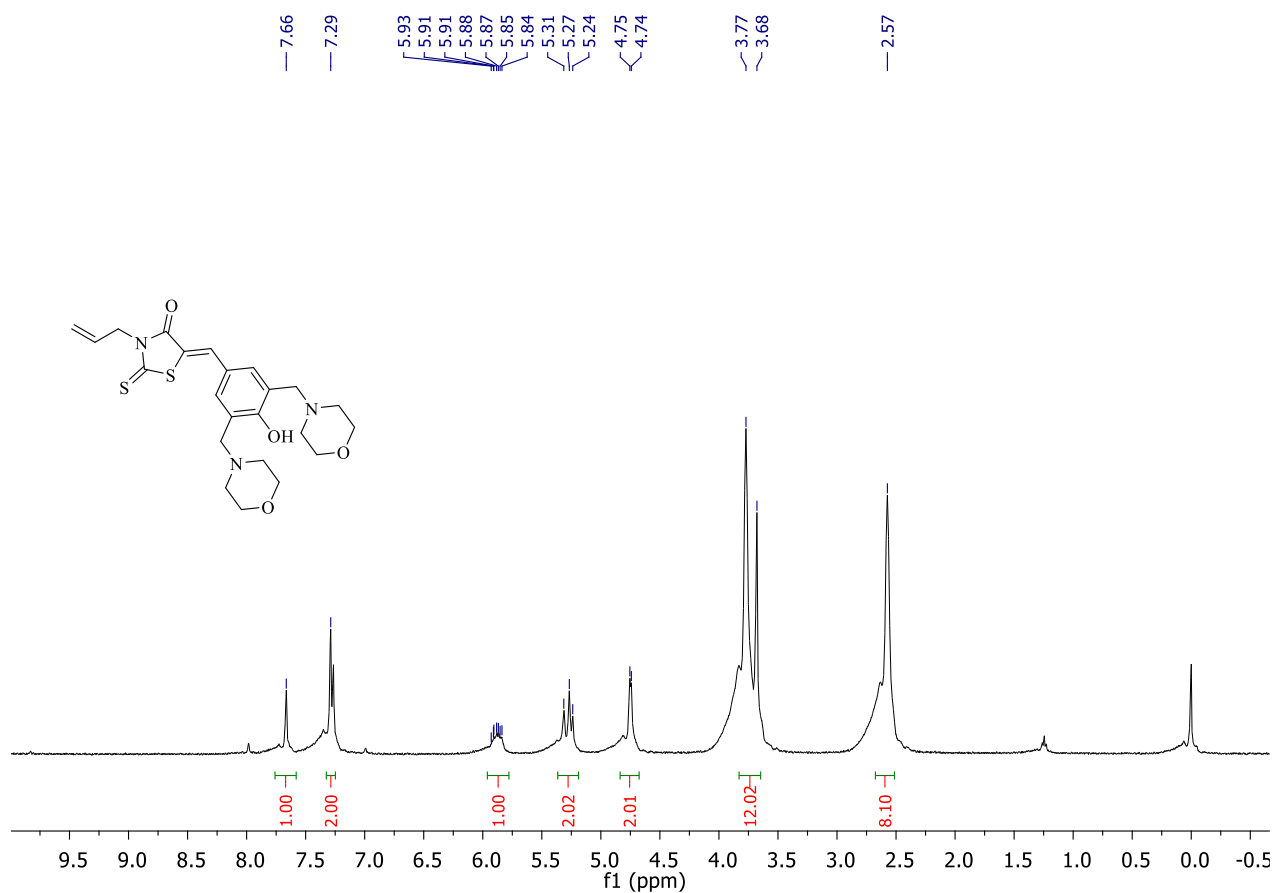

Figure S49. <sup>1</sup>H NMR Spectrum of Compound 13

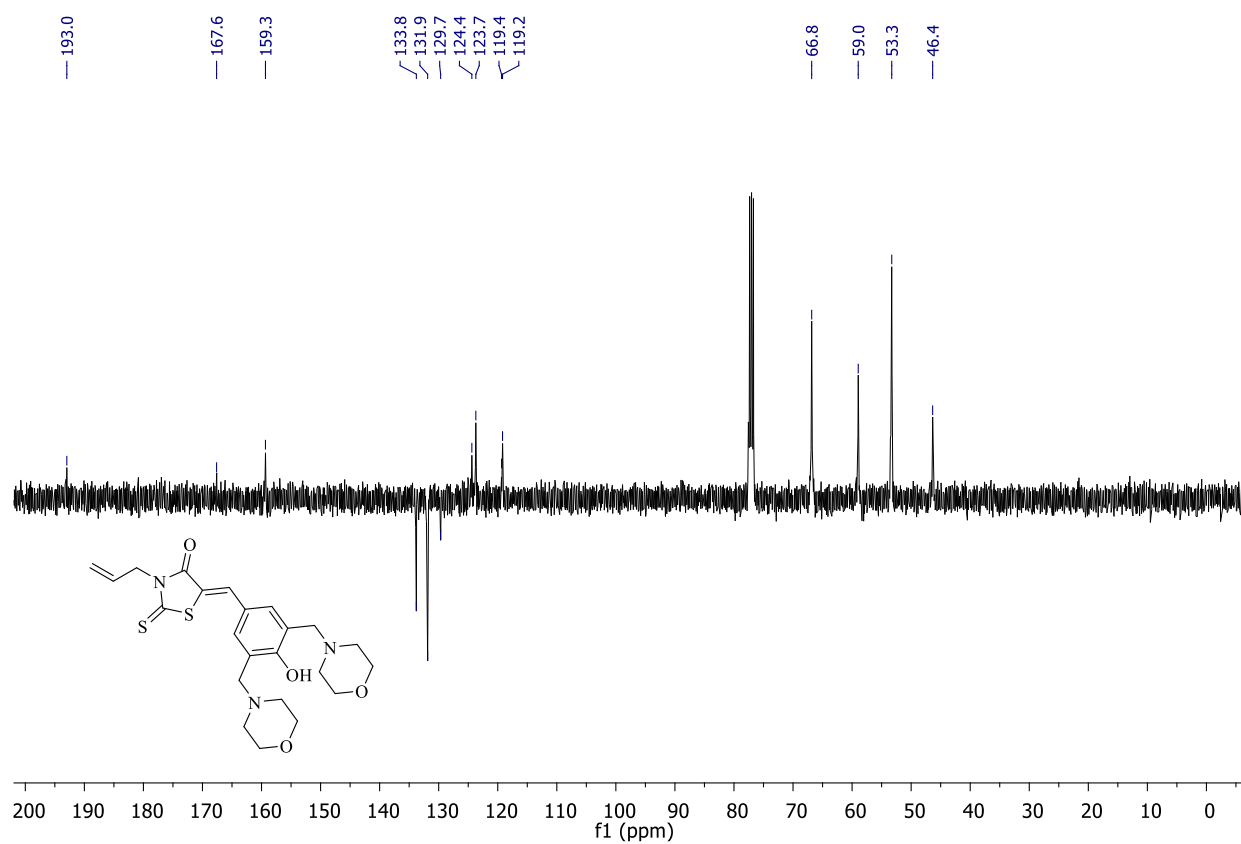

Figure S50. <sup>13</sup>C NMR Spectrum of Compound 13

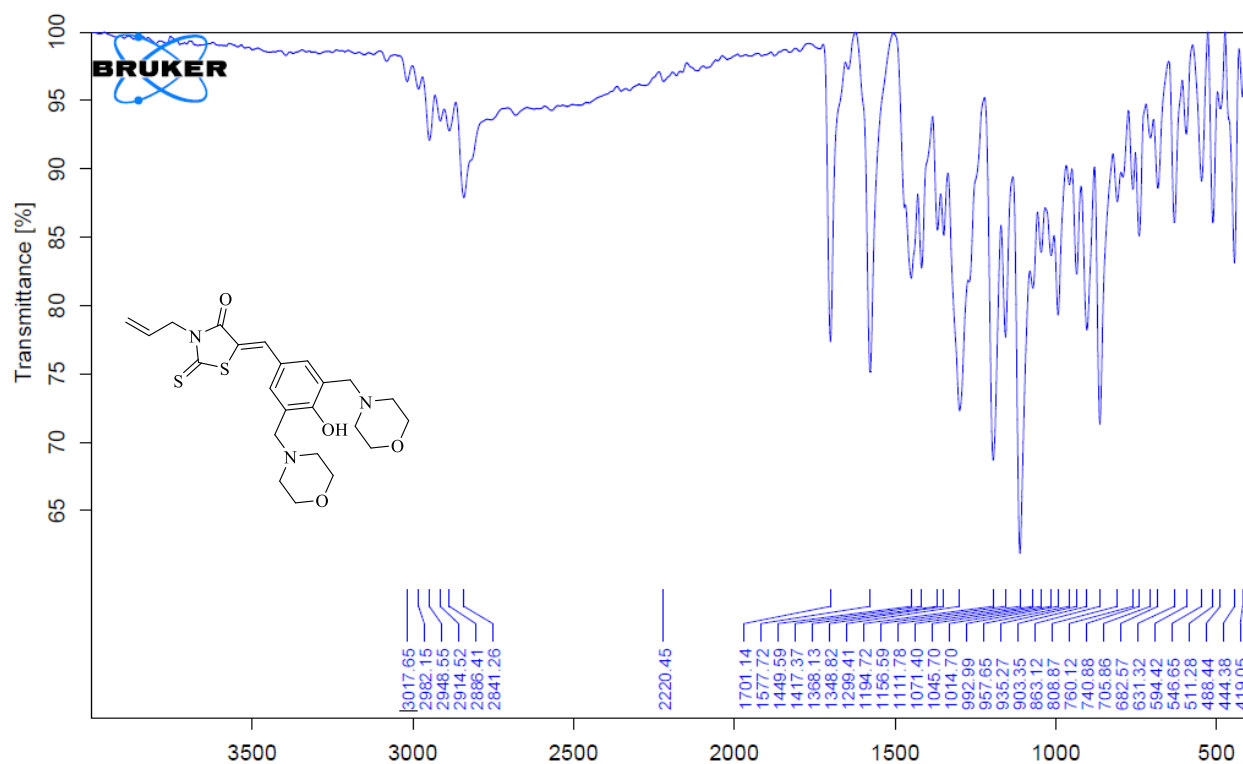

Figure S51. FTIR Spectrum of Compound 13

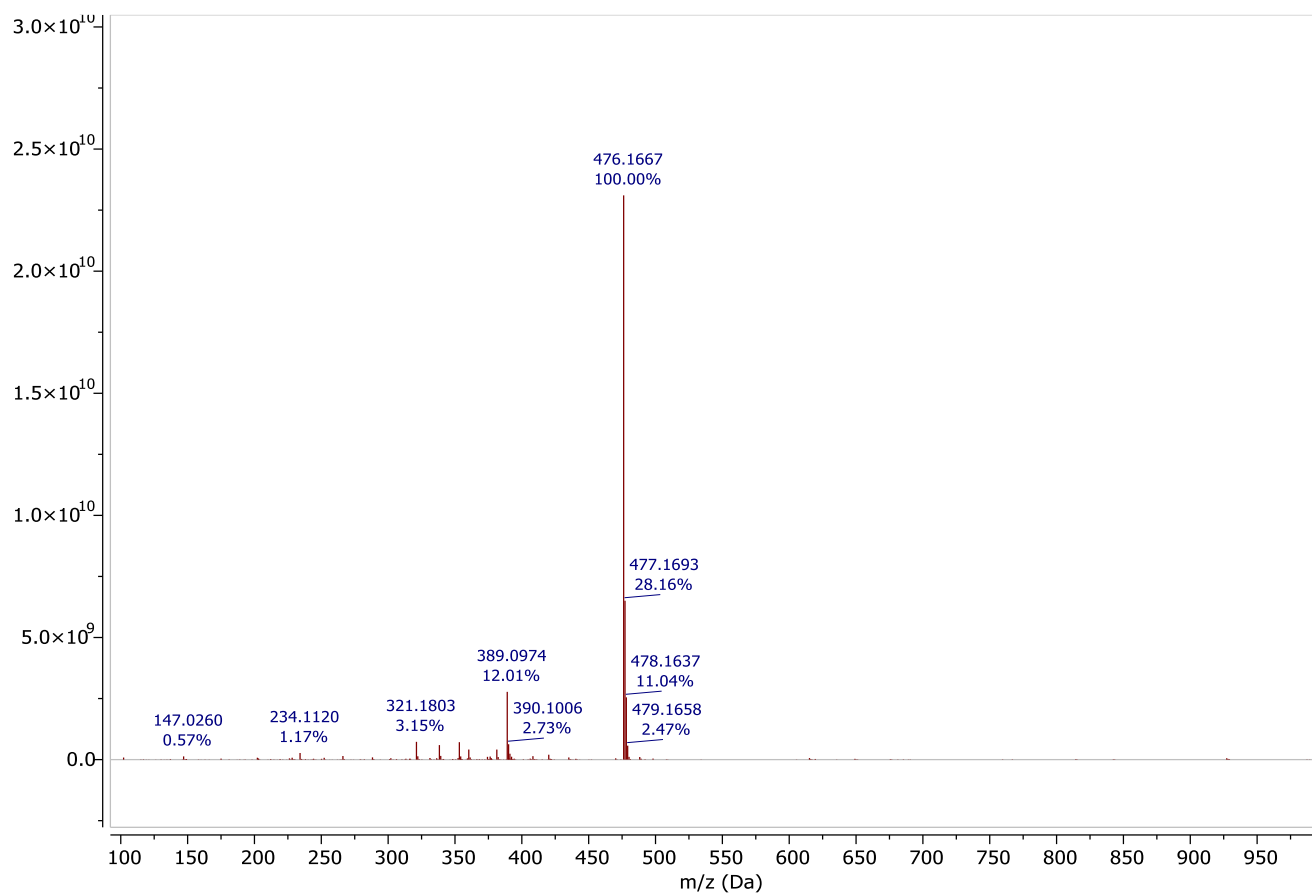

Figure S52. HRMS Spectrum of Compound 13

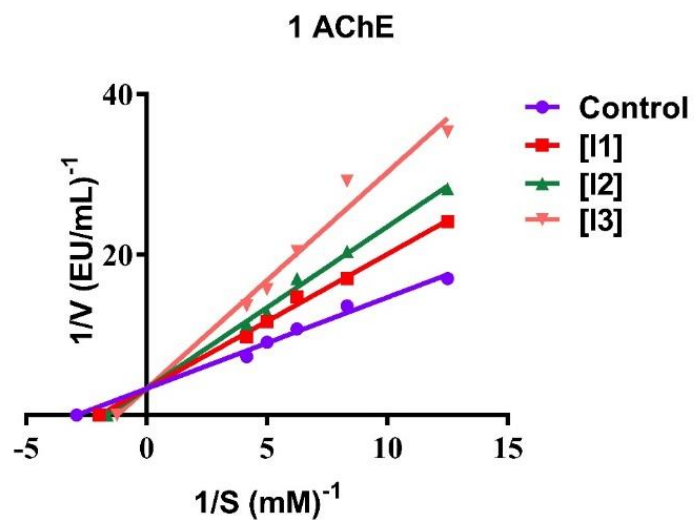

Figure S53. Lineweaver-Burk plots of compound 1 for AChE

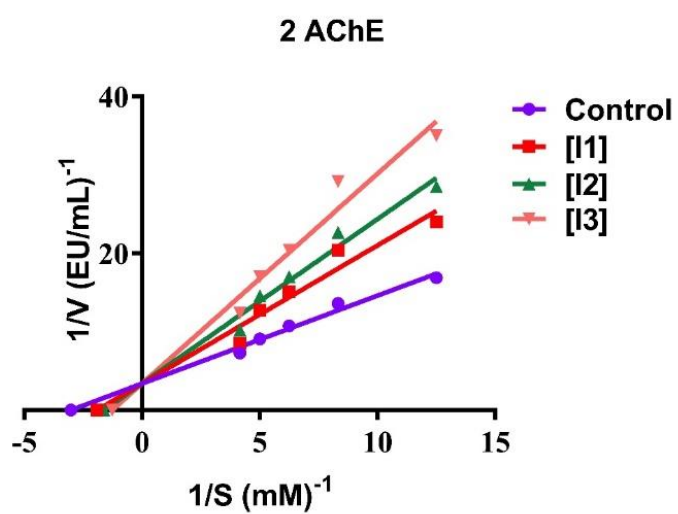

Figure S54. Lineweaver-Burk plots of compound 2 for AChE

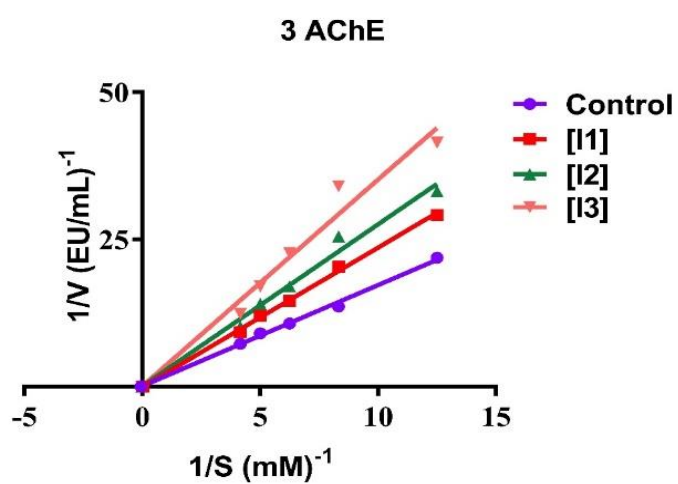

Figure S55. Lineweaver-Burk plots of compound 3 for AChE

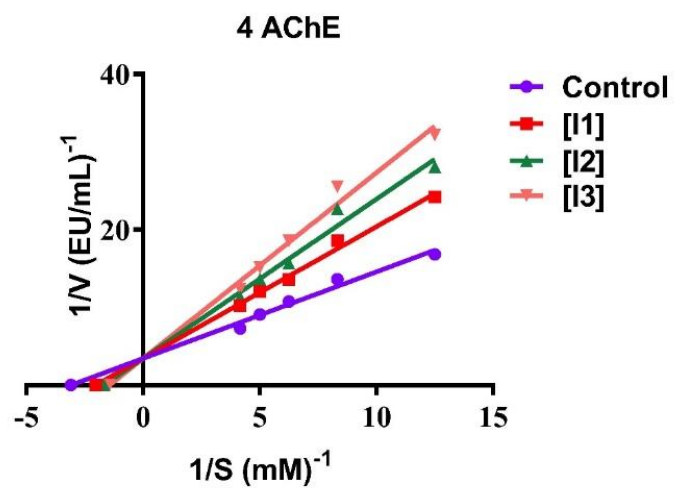

Figure S56. Lineweaver-Burk plots of compound 4 for AChE

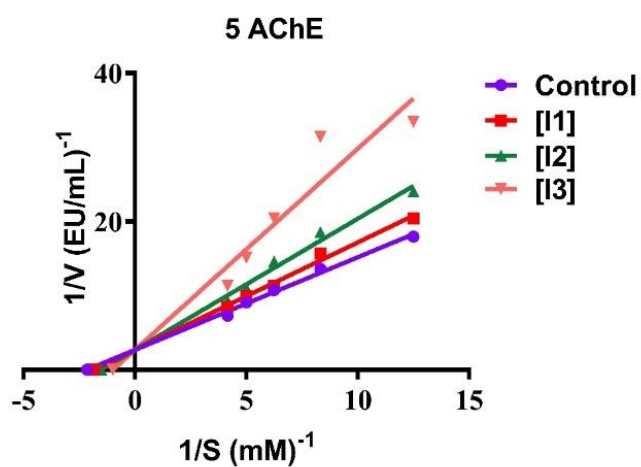

Figure S57. Lineweaver-Burk plots of compound 5 for AChE

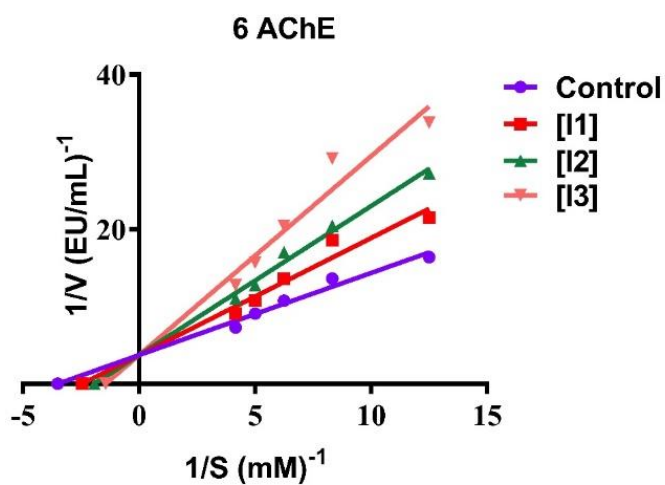

Figure S58. Lineweaver-Burk plots of compound 6 for AChE

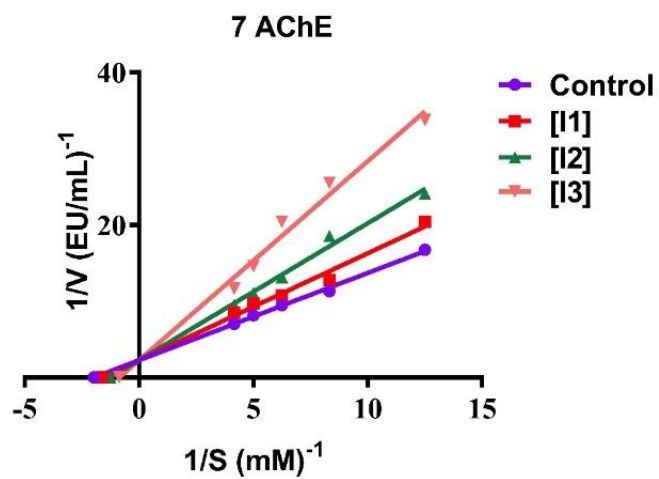

Figure S59. Lineweaver-Burk plots of compound 7 for AChE

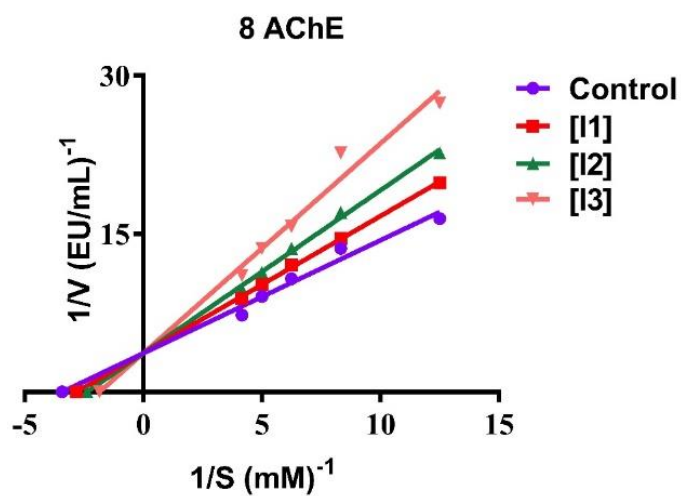

Figure S60. Lineweaver-Burk plots of compound 8 for AChE

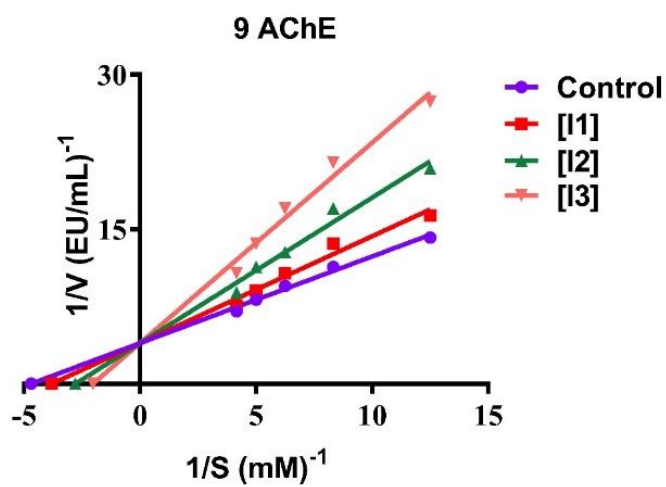

Figure S61. Lineweaver-Burk plots of compound 9 for AChE

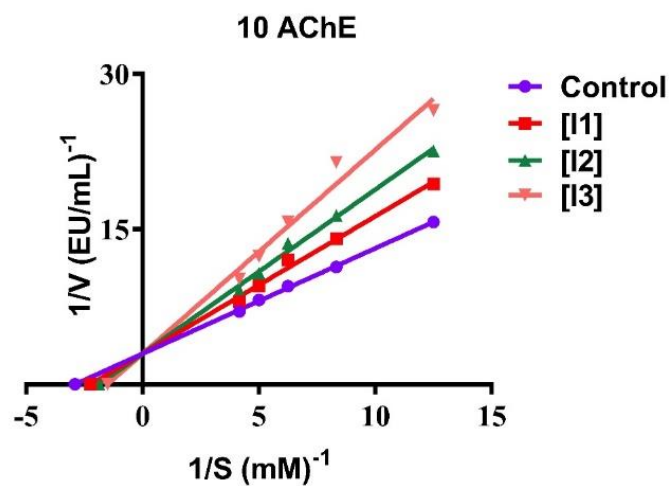

Figure S62. Lineweaver-Burk plots of compound 10 for AChE

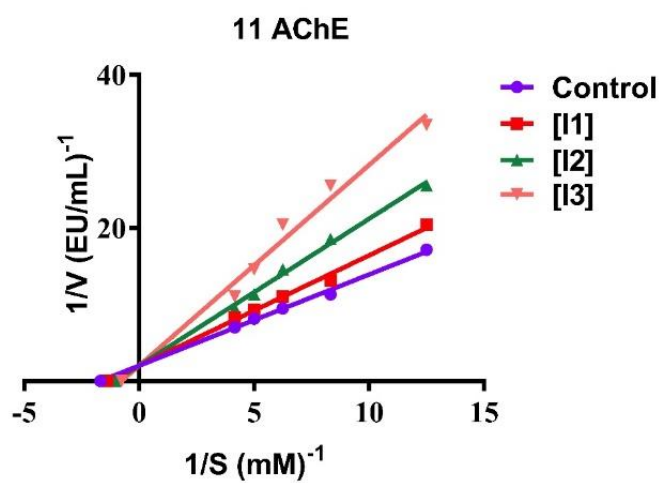

Figure S63. Lineweaver-Burk plots of compound 11 for AChE

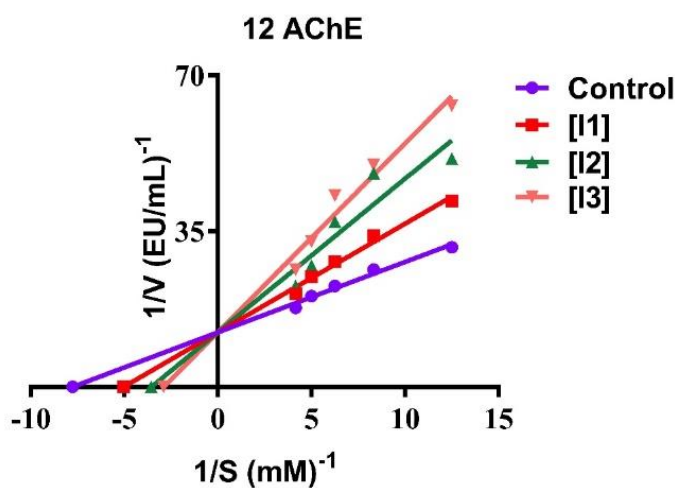

Figure S64. Lineweaver-Burk plots of compound 12 for AChE



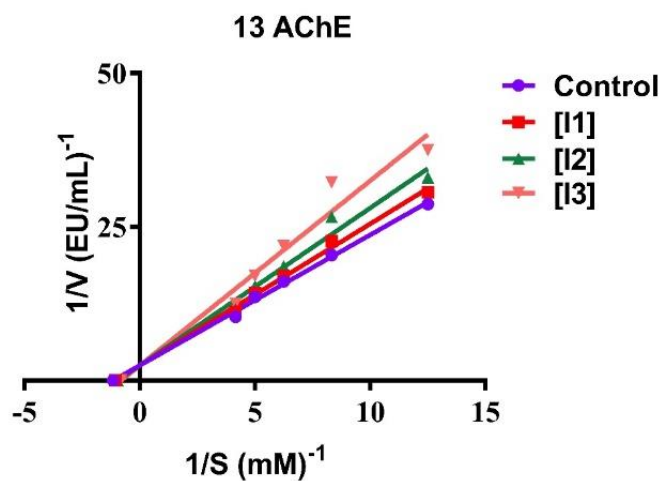

Figure S65. Lineweaver-Burk plots of compound 13 for AChE

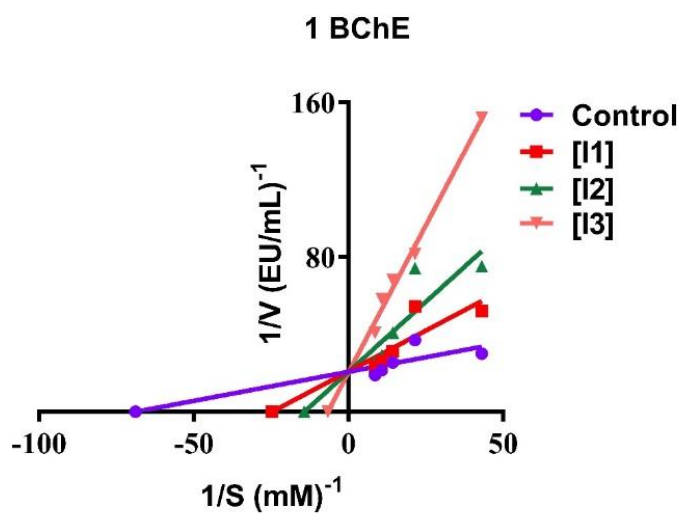

Figure S66. Lineweaver-Burk plots of compound 1 for BChE

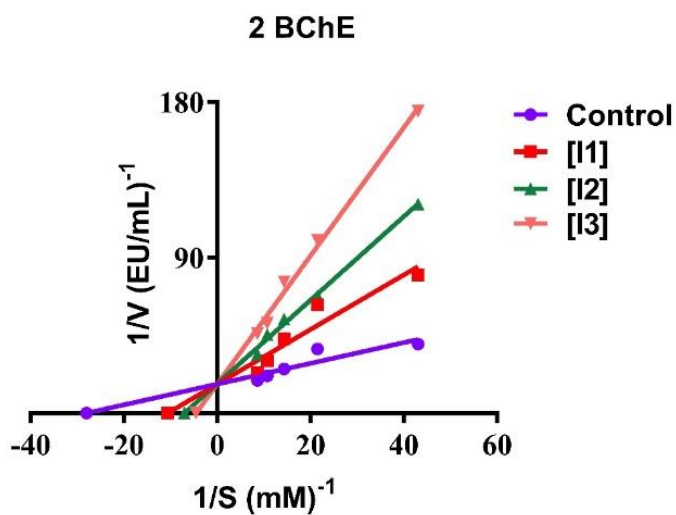

Figure S67. Lineweaver-Burk plots of compound 2 for BChE

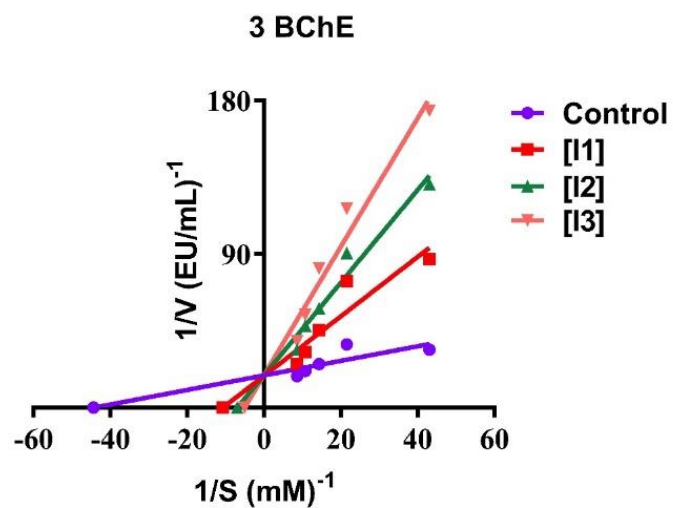

Figure S68. Lineweaver-Burk plots of compound 3 for BChE

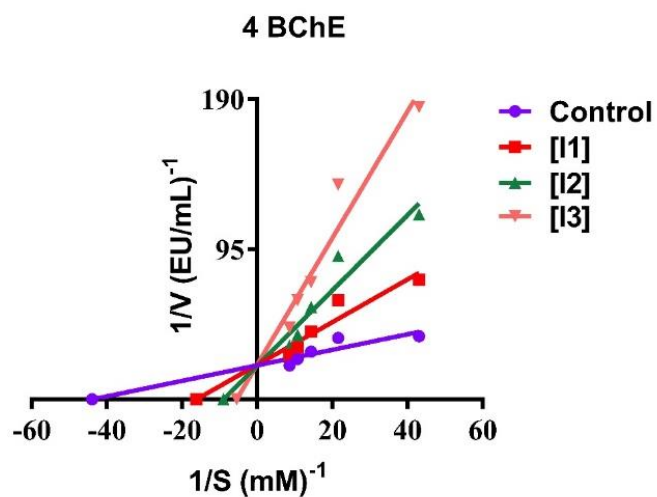

Figure S69. Lineweaver-Burk plots of compound 4 for BChE

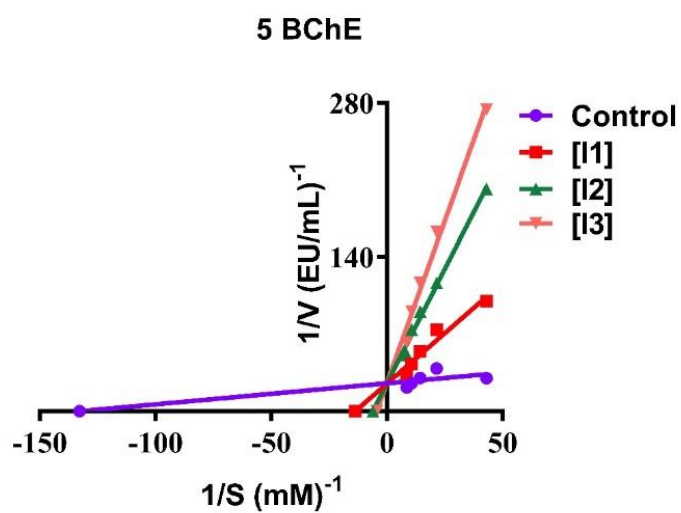

Figure S70. Lineweaver-Burk plots of compound 5 for BChE

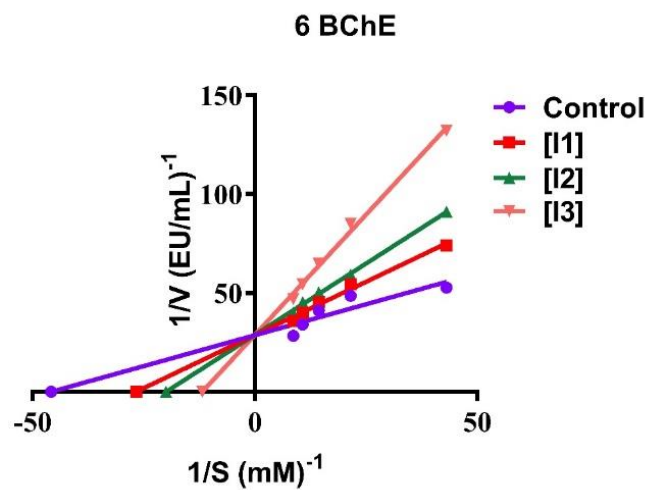

Figure S71. Lineweaver-Burk plots of compound 6 for BChE

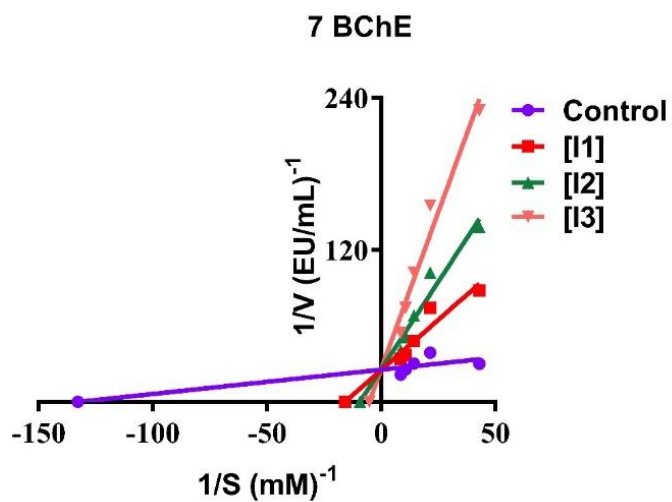

Figure S72. Lineweaver-Burk plots of compound 7 for BChE

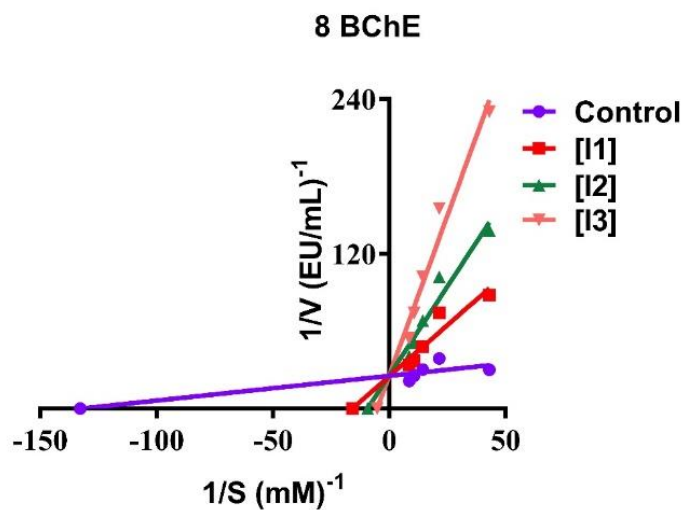

Figure S73. Lineweaver-Burk plots of compound 8 for BChE

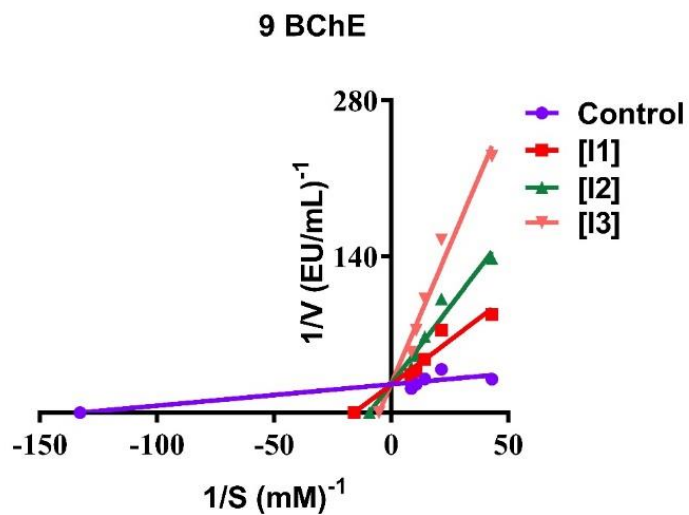

Figure S74. Lineweaver-Burk plots of compound 9 for BChE

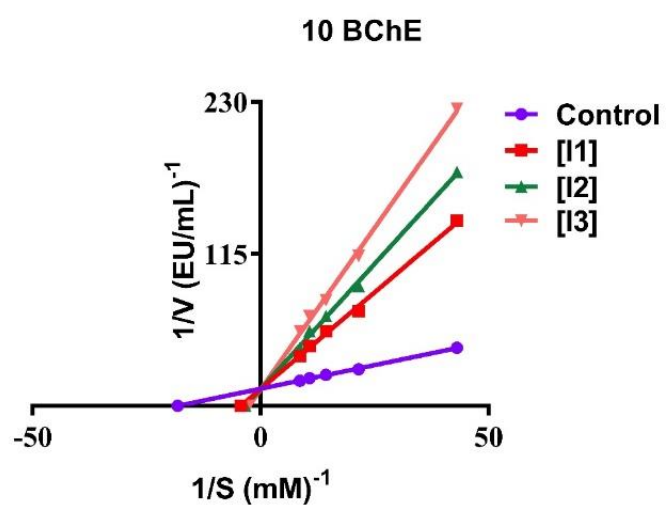

Figure S75. Lineweaver-Burk plots of compound 10 for BChE

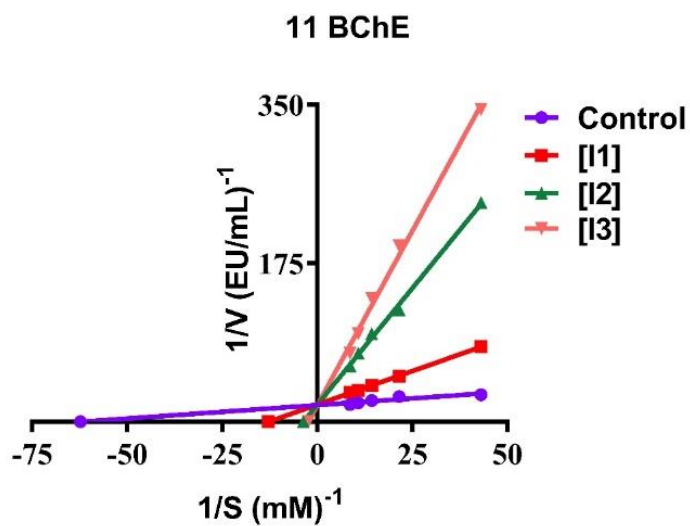

Figure S76. Lineweaver-Burk plots of compound 11 for BChE

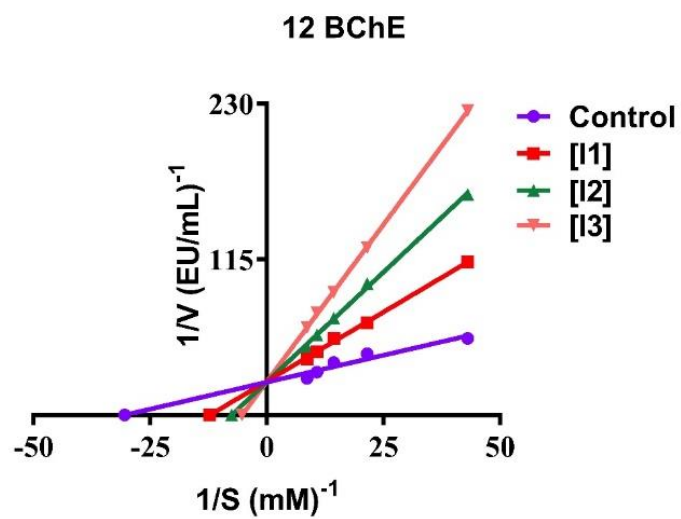

Figure S77. Lineweaver-Burk plots of compound 12 for BChE

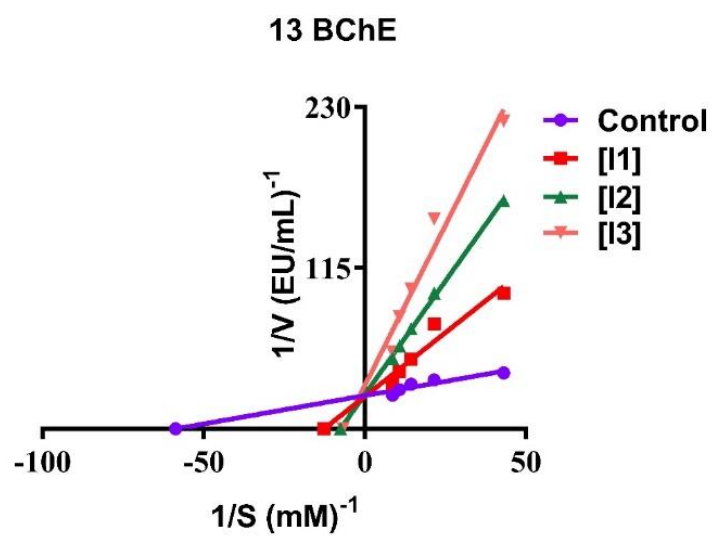

Figure S78. Lineweaver-Burk plots of compound 13 for BChE

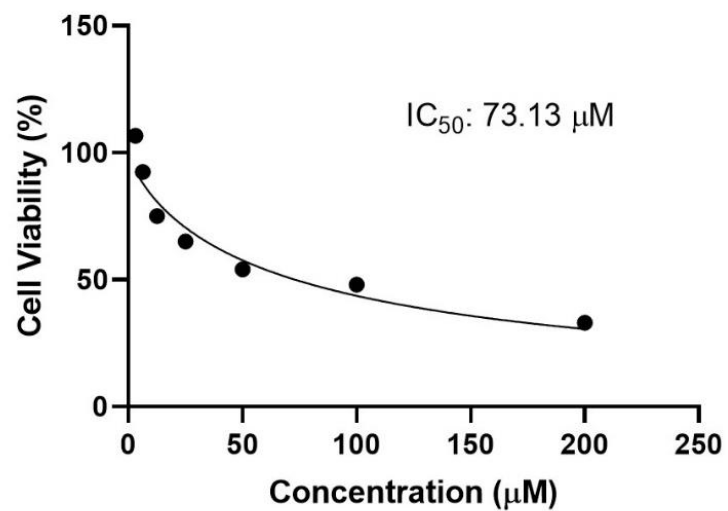

Figure S79. IC<sub>50</sub> Graph of Compound 4 for HUVEC

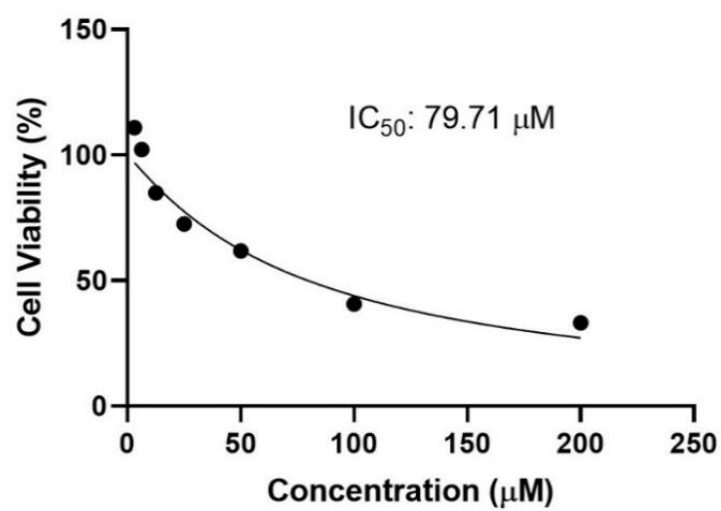

Figure S80. IC<sub>50</sub> Graph of Compound 6 for HUVEC

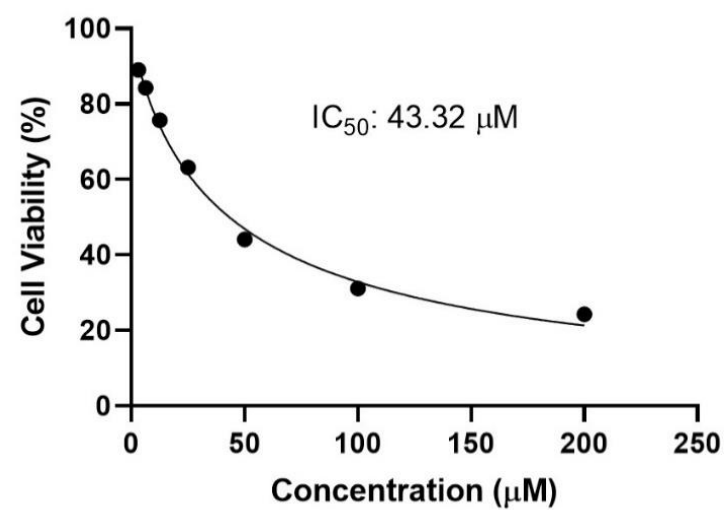

Figure S81. IC<sub>50</sub> Graph of Compound 7 for HUVEC

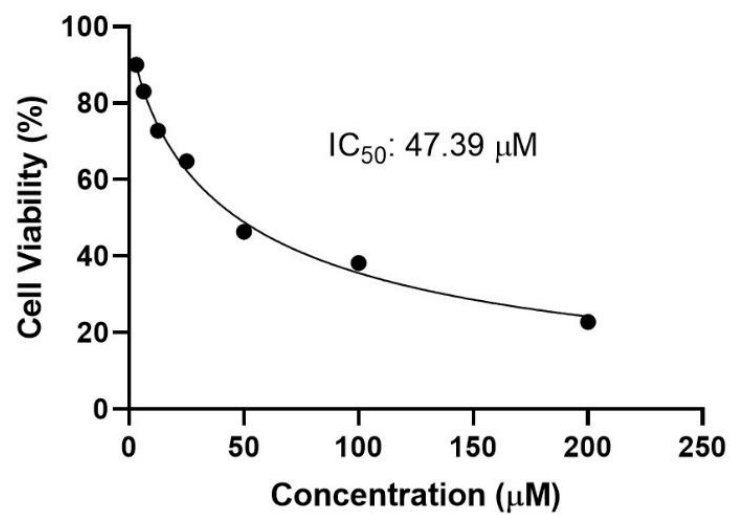

Figure S82. IC<sub>50</sub> Graph of Compound 10 for HUVEC

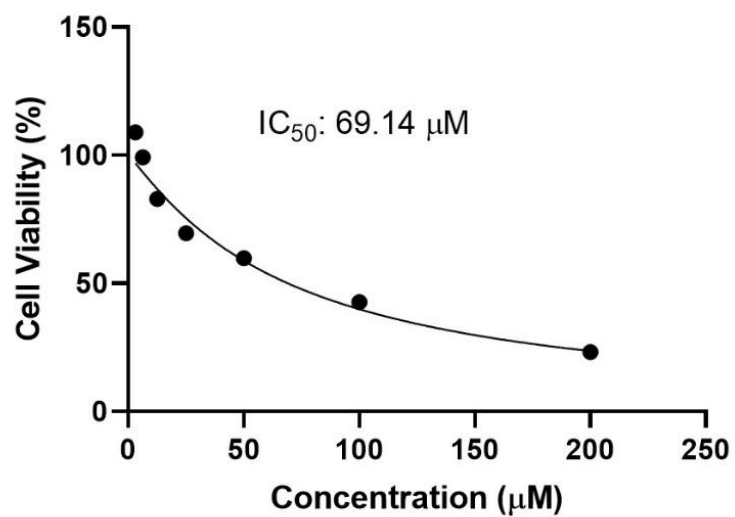

Figure S83. IC<sub>50</sub> Graph of Compound 11 for HUVEC
